# Supplementary material for: Effects of Whole and Partial Heart Irradiation on Collagen, Mast Cells, and Toll-like Receptor 4 in the Mouse Heart
Source: Cancers (Basel). 2023 Jan 7;15(2):406. doi: 10.3390/cancers15020406 (PMC9856613; doi:10.3390/cancers15020406)
Supplement: Supplementary file 1 [file cancers-15-00406-s001.zip]

Archive with 5 entries (5 files):
- Figure S1.pdf
- Figure S2.pdf
- Figure S3.pdf
- Table S1.xlsx
- Table S2.pdf
