# Supplementary material for: Effects of Whole and Partial Heart Irradiation on Collagen, Mast Cells, and Toll-like Receptor 4 in the Mouse Heart
Source: Cancers (Basel). 2023 Jan 7;15(2):406. doi: 10.3390/cancers15020406 (PMC9856613; doi:10.3390/cancers15020406)
Supplement: Supplementary file 1 [file cancers-15-00406-s001.zip › Table S1.xlsx]

## Sheet: Sheet1
	5 Days - Irradiated vs time- and sex-matched sham controls																								2 Weeks - Irradiated vs time- and sex-matched sham controls
	16 Gy whole heart				16 Gy whole heart				16 Gy partial heart				16 Gy partial heart				8 Gy whole heart				8 Gy whole heart				16 Gy whole heart				16 Gy whole heart				16 Gy partial heart				16 Gy partial heart				8 Gy whole heart				8 Gy whole heart
	Female				Male				Female				Male				Female				Male				Female				Male				Female				Male				Female				Male
name	p.value	FDR	Fold Change	log2(FC)	p.value	FDR	Fold Change	log2(FC)	p.value	FDR	Fold Change	log2(FC)	p.value	FDR	Fold Change	log2(FC)	p.value	FDR	Fold Change	log2(FC)	p.value	FDR	Fold Change	log2(FC)	p.value	FDR	Fold Change	log2(FC)	p.value	FDR	Fold Change	log2(FC)	p.value	FDR	Fold Change	log2(FC)	p.value	FDR	Fold Change	log2(FC)	p.value	FDR	Fold Change	log2(FC)	p.value	FDR	Fold Change	log2(FC)
Aminoadipic Acid_Neg	0.001141	0.51118	0.80434	-0.31413	0.31016	0.57259	1.1373	0.18566	0.70785	0.90741	0.97822	-0.031771	0.43386	0.74923	1.0841	0.11651	0.91754	0.97712	1.0007	0.00096896	0.55538	0.84315	1.0672	0.093772	0.92803	0.99034	1.0214	0.030504	0.80104	0.92017	0.96654	-0.049092	0.33173	0.94807	1.1029	0.14127	0.29348	0.67004	1.1326	0.17958	0.87763	0.94544	0.98317	-0.024483	0.77649	0.97923	1.0175	0.025055
Glutaric Acid_Neg	0.0056295	0.58468	0.77805	-0.36207	0.7975	0.8951	1.0208	0.029666	0.26472	0.85069	0.90261	-0.14783	0.54312	0.80588	1.0599	0.083996	0.21939	0.85654	0.89606	-0.15834	0.35642	0.72251	1.0773	0.10742	0.83589	0.99034	0.97309	-0.039357	0.27604	0.74026	0.86461	-0.20987	0.62486	0.94807	0.93869	-0.091285	0.91925	0.95996	0.99083	-0.013294	0.43121	0.77771	0.89678	-0.15717	0.55941	0.93599	0.93769	-0.092814
Phosphoribosyl Pyrophosphate_Neg	0.007918	0.58468	0.77145	-0.37435	0.79347	0.8951	0.95038	-0.07343	0.20801	0.79329	0.92567	-0.11143	0.21297	0.54769	1.1898	0.25067	0.17624	0.85654	0.89397	-0.16169	0.84526	0.94791	1.0219	0.031226	0.9423	0.99034	1.003	0.0043509	0.83459	0.93345	1.0187	0.02675	0.61083	0.94807	1.0497	0.069973	0.14867	0.59525	1.1166	0.15915	0.72559	0.87188	0.94875	-0.075895	0.80643	0.98981	1.0246	0.035095
Isovaleric Acid_Neg	0.0088272	0.58468	0.43305	-1.2074	0.40575	0.6586	0.79664	-0.32799	0.12289	0.75452	0.6753	-0.56641	0.63913	0.84009	0.86594	-0.20766	0.46081	0.88133	0.82792	-0.27243	0.12403	0.55015	0.65301	-0.61481	0.29299	0.99034	0.66994	-0.57789	0.069318	0.50088	0.69691	-0.52096	0.88424	0.9961	0.90565	-0.14297	0.024237	0.41763	0.66806	-0.58195	0.58457	0.83171	1.1079	0.14784	0.11323	0.83784	0.7104	-0.49329
Glucosamine_pos_1	0.0095636	0.58468	0.71626	-0.48144	0.56891	0.76309	1.0737	0.10256	0.10522	0.75452	0.61221	-0.70791	0.45415	0.75077	0.81535	-0.29451	0.23502	0.85654	0.72554	-0.46288	0.4457	0.78303	1.115	0.15707	0.68129	0.99034	1.0618	0.086511	0.20538	0.70222	0.70611	-0.50204	0.37211	0.94807	1.1534	0.20591	0.12087	0.58857	1.2597	0.33306	0.45207	0.77931	1.1061	0.14543	0.90412	0.99333	1.1681	0.22416
3-Indolebutyric Acid_pos	0.010552	0.58468	0.38314	-1.384	0.43574	0.68736	1.3399	0.42208	0.19618	0.77686	0.67552	-0.56593	0.93966	0.96332	1.0175	0.025054	0.20846	0.85654	0.64476	-0.63316	0.86873	0.95594	1.1302	0.17655	0.78289	0.99034	0.93096	-0.10321	0.27611	0.74026	0.58773	-0.76679	0.86556	0.99174	0.93451	-0.097724	0.3022	0.67004	1.32	0.40058	0.43144	0.77771	0.79401	-0.33277	0.7814	0.97923	1.1538	0.20641
Acetylcarnitine_pos	0.011955	0.58468	0.85592	-0.22446	0.11567	0.40832	0.83532	-0.25959	0.090963	0.75452	0.84118	-0.24952	0.49252	0.77267	0.93876	-0.091177	0.79721	0.94965	1.0154	0.021997	0.3956	0.75375	0.93093	-0.10326	0.73009	0.99034	0.96565	-0.050424	0.55291	0.84878	0.96848	-0.0462	0.10023	0.94807	1.272	0.34709	0.25675	0.65796	1.0492	0.069267	0.041178	0.51885	1.2984	0.37677	0.53191	0.93599	1.084	0.11643
5-Phosphoribosyl-1-Pyrophosphate_Neg	0.015144	0.58468	0.78365	-0.35171	0.24923	0.5177	0.85961	-0.21825	0.090531	0.75452	0.90163	-0.1494	0.25286	0.58695	1.1745	0.23209	0.23223	0.85654	0.89447	-0.1609	0.69987	0.87479	0.94645	-0.0794	0.92877	0.99034	1.0115	0.016504	0.92778	0.96939	0.99393	-0.0087797	0.73175	0.9787	1.0247	0.035133	0.38564	0.73519	1.0695	0.096951	0.50536	0.79363	0.91097	-0.13453	0.68411	0.96871	1.0322	0.04578
Acetoacetate_Neg	0.015593	0.58468	0.49744	-1.0074	0.78948	0.8951	0.98113	-0.027482	0.14827	0.77686	0.742	-0.43051	0.60934	0.83808	0.93215	-0.10136	0.33661	0.87225	0.80436	-0.31408	0.21046	0.63873	0.83205	-0.26525	0.60479	0.99034	0.84526	-0.24254	0.038302	0.40316	0.73684	-0.44058	0.97378	0.9961	0.94301	-0.08466	0.10998	0.56048	0.77159	-0.37409	0.71119	0.86622	1.0762	0.10593	0.062125	0.75509	0.7706	-0.37594
Oxalate_Neg	0.016626	0.58468	1.4109	0.49659	0.044735	0.31792	1.5753	0.65562	0.19905	0.77686	1.1937	0.25543	0.036228	0.26458	1.6247	0.70014	0.17499	0.85654	1.2306	0.29932	0.0054897	0.36477	1.7245	0.78618	0.15317	0.99034	1.3312	0.41272	0.67689	0.87644	0.907	-0.14083	0.71877	0.9787	0.90073	-0.15083	0.93559	0.968	0.98029	-0.028723	0.39772	0.77771	1.167	0.22279	0.96863	0.99919	0.96089	-0.05755
Glyceraldehyde_Neg	0.018483	0.58468	1.4989	0.58393	0.078392	0.34524	1.5659	0.64698	0.11644	0.75452	1.2164	0.28261	0.03402	0.26458	1.6381	0.71202	0.071734	0.85654	1.2714	0.34638	0.012071	0.36477	1.7436	0.80204	0.15473	0.99034	1.3849	0.46978	0.62053	0.86604	0.89162	-0.1655	0.79956	0.9787	0.90978	-0.13642	0.73695	0.8996	1.0295	0.041967	0.37849	0.77771	1.1895	0.25035	0.93542	0.99333	0.95714	-0.063202
2-Oxobutanoate_Neg	0.019366	0.58468	0.46908	-1.0921	0.55825	0.76249	0.9003	-0.15152	0.19824	0.77686	0.7526	-0.41005	0.53562	0.80588	0.8949	-0.16021	0.45637	0.88133	0.83463	-0.2608	0.18672	0.61884	0.78784	-0.34403	0.41666	0.99034	0.7777	-0.36271	0.060198	0.47339	0.72093	-0.47207	0.97047	0.9961	0.94372	-0.083567	0.1003	0.5467	0.73641	-0.44142	0.72119	0.87095	1.08	0.11109	0.073041	0.75509	0.74017	-0.43407
IDP_Neg	0.020022	0.58468	0.80754	-0.3084	0.60008	0.78837	0.9525	-0.070212	0.097442	0.75452	0.90635	-0.14186	0.12235	0.40566	1.172	0.22897	0.65936	0.90705	0.97289	-0.039651	0.68814	0.87479	1.049	0.068995	0.73811	0.99034	0.95773	-0.062316	0.7903	0.91962	1.0308	0.043766	0.69785	0.97287	1.0278	0.039519	0.27255	0.66211	1.101	0.13881	0.87421	0.94544	1.0093	0.013407	0.55089	0.93599	1.0319	0.045265
Pyroglutamic Acid_pos	0.020969	0.58468	0.90037	-0.15141	0.52388	0.74124	0.94994	-0.074096	0.086496	0.75452	0.89358	-0.16232	0.079015	0.35215	1.2382	0.30826	0.090366	0.85654	0.8809	-0.18294	0.62507	0.8614	1.0451	0.06367	0.4183	0.99034	0.93994	-0.089358	0.25638	0.74026	1.09	0.12435	0.43022	0.94807	1.0624	0.087366	0.21715	0.64608	1.0914	0.12618	0.14972	0.61966	1.1583	0.21199	0.14007	0.85958	1.142	0.19152
Cis-4-Hydroxy-D-Proline_pos	0.022627	0.58468	0.74291	-0.42873	0.34573	0.60267	1.1443	0.19447	0.12099	0.75452	0.82347	-0.28021	0.23418	0.56103	0.83281	-0.26393	0.056196	0.85654	0.80227	-0.31785	0.65332	0.87115	1.165	0.22028	0.29745	0.99034	1.1171	0.15978	0.057083	0.47339	1.2596	0.33294	0.027845	0.94807	1.4343	0.52035	0.013989	0.30546	1.3887	0.47375	0.06734	0.51885	1.3225	0.4033	0.032269	0.75509	1.3719	0.45618
Uridine 5-Diphosphate_Neg	0.022821	0.58468	0.81577	-0.29376	0.64387	0.80863	0.94847	-0.076333	0.18436	0.77686	0.86467	-0.20977	0.93962	0.96332	0.99194	-0.011674	0.57822	0.88885	0.96463	-0.051946	0.32449	0.70228	1.1267	0.17215	0.469	0.99034	1.123	0.1673	0.71016	0.88666	0.95424	-0.067573	0.97831	0.9961	0.98315	-0.02452	0.83608	0.93864	1.036	0.051035	0.29249	0.70419	1.1408	0.19006	0.64372	0.96871	1.0383	0.054168
3-Hydroxypropionic Acid_Neg	0.024253	0.58468	1.582	0.66179	0.088577	0.36798	1.547	0.62948	0.17425	0.77686	1.2163	0.28248	0.037235	0.26458	1.6548	0.72662	0.034237	0.85654	1.3156	0.39572	0.020055	0.39242	1.8029	0.85031	0.1079	0.99034	1.5229	0.60686	0.73383	0.89336	0.94022	-0.088929	0.91899	0.9961	0.97652	-0.034283	0.77414	0.90477	1.023	0.032791	0.204	0.67645	1.3713	0.45559	0.67076	0.96871	0.92659	-0.10999
Indole-2-Carboxylic Acid_Neg	0.02649	0.58468	0.82983	-0.26912	0.18311	0.47106	1.1127	0.15412	0.014704	0.74418	0.83289	-0.26379	0.21772	0.54769	1.101	0.13879	0.17583	0.85654	0.87863	-0.18666	0.0035629	0.36477	1.2496	0.32144	0.96199	0.99034	1.0003	0.0004939	0.21004	0.70222	0.89712	-0.15663	0.39006	0.94807	0.90508	-0.14388	0.92905	0.9657	0.99801	-0.0028686	0.65708	0.84401	0.94544	-0.080939	0.47681	0.92473	0.93337	-0.099479
Lactate_Neg	0.030852	0.58468	1.4169	0.50276	0.058495	0.31792	1.5825	0.66219	0.24199	0.83103	1.1612	0.21566	0.02107	0.26458	1.6796	0.74813	0.10524	0.85654	1.2624	0.33617	0.0070847	0.36477	1.7382	0.79762	0.18409	0.99034	1.3416	0.42397	0.70407	0.88666	0.92042	-0.11963	0.7752	0.9787	0.89788	-0.1554	0.73024	0.8996	1.0272	0.038758	0.40894	0.77771	1.18	0.23876	0.8726	0.99333	0.94514	-0.081397
Palmitoylcarnitine_pos	0.032464	0.58468	0.68199	-0.55218	0.40054	0.6586	0.88796	-0.17144	0.07379	0.75452	0.64894	-0.62383	0.26585	0.61078	0.84211	-0.24792	0.34349	0.87225	0.86913	-0.20235	0.1325	0.55659	0.79611	-0.32897	0.94557	0.99034	0.98646	-0.019673	0.279	0.74026	1.1507	0.20257	0.29218	0.94807	1.1744	0.2319	0.71488	0.8996	1.0628	0.087815	0.08269	0.5269	1.5039	0.58871	0.37376	0.90025	1.1991	0.2619
Acetylglycine/Guanidineacetate_pos	0.034573	0.58468	0.61628	-0.69834	0.75043	0.8894	0.97905	-0.030547	0.14495	0.77686	0.73229	-0.44951	0.83816	0.94742	1.0539	0.07578	0.41328	0.88133	0.85313	-0.22917	0.50468	0.80749	0.91437	-0.12916	0.65418	0.99034	0.88136	-0.18219	0.74256	0.8991	1.0445	0.062881	0.2219	0.94807	1.3189	0.39934	0.70843	0.89909	0.95499	-0.066439	0.073126	0.51885	1.566	0.64712	0.69419	0.96871	1.1841	0.24384
Pantothenic Acid_Neg	0.035558	0.58468	0.73209	-0.44991	0.48879	0.72588	1.1479	0.19897	0.06973	0.75452	0.79623	-0.32874	0.082774	0.35215	1.3724	0.45667	0.027522	0.85654	0.77397	-0.36964	0.056165	0.47457	1.3312	0.41275	0.061601	0.99034	1.3272	0.40843	0.75525	0.90768	0.97881	-0.030902	0.29004	0.94807	1.1238	0.16839	0.23141	0.65778	1.1385	0.18709	0.45369	0.77931	1.1118	0.15289	0.92698	0.99333	1.0126	0.018055
Xanthurenic Acid_Neg_1	0.037851	0.58468	0.82106	-0.28444	0.00045973	0.10298	1.4958	0.58093	0.19763	0.77686	0.87228	-0.19713	0.086228	0.35215	1.3095	0.38899	0.17264	0.85654	0.87394	-0.19439	0.0089192	0.36477	1.3079	0.3872	0.50827	0.99034	1.1045	0.14345	0.39398	0.80228	0.91858	-0.12253	0.5527	0.94807	0.87888	-0.18627	0.93256	0.9671	0.99926	-0.0010639	0.67699	0.85167	1.0624	0.087308	0.73539	0.96871	0.97865	-0.03113
Guanidineacetate_Neg	0.038495	0.58468	0.42192	-1.245	0.95631	0.98944	1.0233	0.033246	0.42714	0.87727	0.75813	-0.39949	0.64083	0.84009	1.0506	0.071182	0.67618	0.90705	0.86554	-0.20832	0.79947	0.93515	0.90594	-0.14251	0.68836	0.99034	0.76901	-0.37893	0.64449	0.86804	1.1003	0.13793	0.43972	0.94807	1.1498	0.20134	0.35577	0.71779	0.84096	-0.2499	0.23991	0.67645	1.3661	0.45006	0.92291	0.99333	1.0113	0.016148
N-Acetylglycine_Neg	0.0408	0.58468	0.39059	-1.3563	0.79195	0.8951	1.1906	0.25172	0.34366	0.87727	0.69174	-0.5317	0.41482	0.74914	1.1331	0.18024	0.58685	0.88885	0.80268	-0.3171	0.81121	0.93557	0.93471	-0.097403	0.5971	0.99034	0.76004	-0.39585	0.92215	0.9675	1.035	0.049592	0.47454	0.94807	1.1478	0.19889	0.41712	0.75656	0.84656	-0.24031	0.3321	0.73466	1.2401	0.31046	0.97199	0.99919	1.0509	0.071565
Glucosamine 6-Phosphate_Neg	0.044472	0.58468	0.70811	-0.49796	0.95211	0.98738	1.2205	0.28749	0.39311	0.87727	0.87546	-0.19189	0.012531	0.26458	3.2142	1.6845	0.4232	0.88133	1.2775	0.35336	0.097571	0.52791	1.6345	0.70882	0.39781	0.99034	0.82048	-0.28546	0.65103	0.86804	0.9707	-0.042909	0.24062	0.94807	1.2587	0.33192	0.096471	0.53754	1.4429	0.52895	0.27351	0.69465	1.2215	0.2886	0.46621	0.92473	1.2183	0.28491
Alpha-Tocopherol_Neg	0.045119	0.58468	0.71937	-0.4752	0.029527	0.28773	1.6708	0.74053	0.10384	0.75452	0.76297	-0.39031	0.073898	0.34203	1.382	0.46673	0.21105	0.85654	0.80882	-0.30611	0.067716	0.49851	1.2754	0.35091	0.28767	0.99034	1.2953	0.37334	0.6653	0.86904	0.95957	-0.059539	0.89647	0.9961	0.99441	-0.0080885	0.77824	0.90477	1.0662	0.092414	0.24123	0.67645	1.3094	0.38893	0.99854	0.99919	1.0342	0.048482
Ethanolamine_pos	0.045917	0.58468	1.0934	0.12888	0.64411	0.80863	0.95738	-0.06284	0.7292	0.90741	1.0359	0.050834	0.13264	0.42446	1.3067	0.38598	0.77706	0.94371	1.0355	0.050271	0.23043	0.65338	1.1987	0.26153	0.38592	0.99034	0.93771	-0.092792	0.61698	0.86572	1.0811	0.11249	0.67818	0.97058	1.042	0.059379	0.23902	0.65796	1.1574	0.21086	0.15232	0.62032	1.1809	0.2399	0.5114	0.92756	1.1379	0.18642
Sedoheptulose Phosphates_Neg	0.046399	0.58468	0.74887	-0.41722	0.80016	0.8951	0.91578	-0.12693	0.49895	0.87727	0.91218	-0.13261	0.052695	0.29145	1.8248	0.86773	0.72784	0.92719	1.0662	0.092513	0.29021	0.69687	1.4207	0.5066	0.9097	0.99034	0.9172	-0.12469	0.44344	0.83274	1.242	0.31266	0.25909	0.94807	1.3132	0.39312	0.088515	0.537	1.487	0.57243	0.30734	0.71181	1.2791	0.35517	0.26455	0.86825	1.3279	0.40914
Mesaconic Acid_pos_2	0.047295	0.58468	1.1319	0.17875	0.16072	0.46755	0.90576	-0.1428	0.81824	0.92054	1.0042	0.0060884	0.89652	0.95474	0.9973	-0.0039058	0.19927	0.85654	1.0345	0.048865	0.99568	0.99881	1.0013	0.0018032	0.38618	0.99034	0.95071	-0.072917	0.46183	0.83954	1.0329	0.046654	0.23038	0.94807	1.1417	0.19122	0.62781	0.86402	1.0471	0.06637	0.079455	0.5223	1.1754	0.23314	0.77159	0.97923	1.0553	0.077709
Butylcarnitine_pos	0.051283	0.58468	1.5295	0.61304	0.12336	0.41552	1.506	0.59074	0.32497	0.86557	1.3532	0.43642	0.022894	0.26458	1.4084	0.49405	0.82695	0.95877	0.96075	-0.057774	0.87892	0.9561	1.2225	0.28986	0.085733	0.99034	0.79406	-0.33268	0.0036318	0.1628	2.5614	1.3569	0.14661	0.94807	1.2461	0.31743	0.056822	0.537	1.6493	0.72184	0.53414	0.80935	1.0776	0.10776	0.41518	0.92217	1.1919	0.25321
N-Acetylmethionine_Neg	0.051584	0.58468	1.4095	0.49522	0.077608	0.34524	1.501	0.58596	0.86316	0.94315	0.97618	-0.034787	0.11654	0.39856	1.5132	0.59758	0.40941	0.88133	0.86971	-0.20139	0.14832	0.55908	1.8618	0.89673	0.17179	0.99034	1.3744	0.45879	0.023414	0.31786	1.4956	0.58075	0.33959	0.94807	0.88038	-0.1838	0.39642	0.74308	1.1082	0.14828	0.58692	0.83171	1.0797	0.11065	0.38357	0.90513	1.1607	0.21503
Lipoamide_pos_1	0.052146	0.58468	0.88877	-0.17011	0.55015	0.75836	1.0487	0.068666	0.040415	0.75452	0.79849	-0.32466	0.6024	0.83553	1.1082	0.14816	0.1244	0.85654	0.86072	-0.21639	0.30668	0.69687	1.1199	0.16337	0.33502	0.99034	1.0657	0.091838	0.22214	0.73176	1.1038	0.14247	0.2368	0.94807	1.0945	0.13033	0.36896	0.72785	1.0783	0.10875	0.036029	0.51885	1.2388	0.309	0.53711	0.93599	1.0851	0.11782
ADP-Glucose_pos	0.052576	0.58468	0.42525	-1.2336	0.49736	0.73055	1.4793	0.56496	0.15144	0.77686	0.57751	-0.79208	0.70803	0.87779	0.88645	-0.17389	0.44194	0.88133	0.80188	-0.31853	0.41008	0.75375	1.598	0.67624	0.46017	0.99034	1.4977	0.58279	0.32255	0.77152	0.6477	-0.6266	0.11057	0.94807	2.0371	1.0265	0.76014	0.90477	0.92686	-0.10958	0.6123	0.83445	1.2634	0.33732	0.66324	0.96871	0.87529	-0.19217
2-Aminopimelic Acid_Neg	0.055227	0.58468	0.58717	-0.76815	0.34026	0.59545	1.1326	0.17968	0.41461	0.87727	0.88343	-0.17882	0.75638	0.91091	1.0226	0.032225	0.60397	0.88885	0.92023	-0.11993	0.33358	0.70826	1.1932	0.25482	0.92849	0.99034	1.0177	0.025336	0.40123	0.80621	0.91857	-0.12254	0.157	0.94807	0.8587	-0.21977	0.76472	0.90477	0.97712	-0.033395	0.99358	0.99687	0.99761	-0.003451	0.44664	0.92473	1.065	0.090828
D-Erythrose 4-Phosphate_Neg	0.05536	0.58468	0.84384	-0.24496	0.062586	0.31792	0.4904	-1.028	0.67575	0.90741	1.0203	0.029027	0.077097	0.35215	1.2277	0.29592	0.3894	0.87679	1.0687	0.0958	0.54248	0.83105	0.89687	-0.15704	0.29193	0.99034	0.76539	-0.38573	0.6392	0.86804	0.94116	-0.087484	0.68542	0.97058	0.94543	-0.080952	0.24879	0.65796	1.1439	0.19402	0.93908	0.97891	1.002	0.0029018	0.44657	0.92473	1.0742	0.10321
Itaconic Acid_Neg	0.055468	0.58468	1.1961	0.25837	0.83421	0.90905	1.1961	0.25831	0.81058	0.91934	1.0484	0.068207	0.025537	0.26458	0.52891	-0.9189	0.67716	0.90705	0.95633	-0.064427	0.1899	0.62099	0.71261	-0.48882	0.66128	0.99034	1.063	0.088208	0.18044	0.70208	0.70185	-0.51076	0.20454	0.94807	0.74414	-0.42635	0.039459	0.47778	0.5502	-0.86198	0.11449	0.58521	0.67192	-0.57364	0.1245	0.84511	0.60772	-0.71852
Riboflavin_pos	0.058655	0.58468	0.84311	-0.24621	0.23387	0.50301	0.92633	-0.11039	0.022697	0.75452	0.82073	-0.28502	0.58374	0.82499	0.96265	-0.054912	0.16629	0.85654	0.8074	-0.30864	0.88723	0.9561	0.99299	-0.010148	0.41358	0.99034	0.94885	-0.075754	0.59846	0.86465	1.0348	0.049323	0.75375	0.9787	0.97569	-0.035507	0.051866	0.537	0.86309	-0.21242	0.79771	0.924	1.0296	0.042085	0.61921	0.96871	0.95128	-0.072055
Stearoylcarnitine_pos	0.059342	0.58468	0.80291	-0.3167	0.1009	0.39471	0.89685	-0.15707	0.13653	0.76648	0.7793	-0.35974	0.29345	0.64215	0.91075	-0.13487	0.3933	0.87679	0.91115	-0.13423	0.21101	0.63873	0.94103	-0.087695	0.88236	0.99034	0.97361	-0.038589	0.030391	0.36388	1.2503	0.32233	0.30226	0.94807	1.155	0.20783	0.19097	0.63081	1.1565	0.20978	0.038596	0.51885	1.358	0.44143	0.20439	0.86825	1.2432	0.31406
Oxaloacetate_Neg	0.060995	0.58468	0.85513	-0.22578	0.31058	0.57259	1.0674	0.094089	0.59146	0.90341	0.96097	-0.057442	0.6013	0.83553	1.0366	0.051904	0.60332	0.88885	0.96599	-0.049926	0.66309	0.87115	1.0346	0.049124	0.83489	0.99034	0.9812	-0.027379	0.32426	0.77152	0.92491	-0.11262	0.97735	0.9961	0.99348	-0.0094416	0.88408	0.95799	0.99415	-0.0084691	0.86412	0.94217	1.0163	0.023336	0.49054	0.92756	0.97083	-0.042714
Indole-3-Carboxylic Acid_Neg	0.062212	0.58468	0.79148	-0.33738	0.13125	0.42974	1.2106	0.27578	0.14633	0.77686	0.85461	-0.22666	0.36123	0.70978	1.0994	0.13671	0.56159	0.88885	0.93401	-0.098486	0.030817	0.41836	1.2221	0.28941	0.73979	0.99034	1.0433	0.061142	0.097133	0.55789	0.83024	-0.2684	0.8498	0.98791	0.97884	-0.030861	0.95408	0.98034	1.0095	0.013627	0.84903	0.93708	1.0184	0.026338	0.4376	0.92473	0.91546	-0.12743
Carbamoylaspartate_pos	0.06307	0.58468	0.81212	-0.30023	0.046499	0.31792	1.2556	0.32841	0.075853	0.75452	0.78144	-0.35578	0.10027	0.36821	1.2911	0.3686	0.22727	0.85654	0.78022	-0.35805	0.37638	0.73472	1.336	0.41797	0.44018	0.99034	1.1352	0.18291	0.40862	0.8136	1.1176	0.16038	0.45132	0.94807	1.1324	0.17941	0.34471	0.70196	1.2288	0.29719	0.15674	0.62617	1.2411	0.3116	0.47681	0.92473	1.2113	0.2766
Indole-3-Carboxylic Acid_pos	0.065892	0.58468	0.75894	-0.39794	0.066433	0.31792	0.74925	-0.41649	0.14944	0.77686	0.79542	-0.33021	0.89691	0.95474	1.0381	0.053933	0.022816	0.85654	0.6852	-0.54541	0.99966	0.99966	1.0679	0.094822	0.93762	0.99034	0.99166	-0.012087	0.97199	0.99016	1.0177	0.025366	0.50431	0.94807	1.0653	0.091258	0.13356	0.59525	0.85651	-0.22346	0.14189	0.61296	1.1811	0.24018	0.25607	0.86825	0.83267	-0.26419
Flavone_pos	0.066027	0.58468	0.48535	-1.0429	0.44408	0.69093	0.65402	-0.6126	0.24923	0.83103	0.77545	-0.3669	0.74286	0.89946	0.82663	-0.27469	0.15325	0.85654	0.63712	-0.65036	0.88995	0.9561	0.9642	-0.052595	0.37779	0.99034	1.603	0.68073	0.35726	0.79628	0.8091	-0.30561	0.097237	0.94807	2.1033	1.0727	0.28389	0.66806	0.73071	-0.45263	0.063171	0.51885	2.5681	1.3607	0.34827	0.89633	0.78897	-0.34196
CMP_Neg	0.066722	0.58468	0.8356	-0.25912	0.081754	0.34882	1.1527	0.20497	0.61443	0.90341	1.1565	0.20979	0.10197	0.37139	1.1467	0.19754	0.33895	0.87225	0.95224	-0.070601	0.02916	0.40824	1.2756	0.35115	0.95499	0.99034	0.99674	-0.0047048	0.66629	0.86904	1.0685	0.09555	0.82711	0.97971	0.97725	-0.033207	0.18863	0.63081	1.4411	0.52718	0.87984	0.94544	0.98352	-0.023971	0.19173	0.86825	1.1227	0.167
Indole_Neg	0.067387	0.58468	0.83276	-0.26403	0.056102	0.31792	1.2867	0.36367	0.027351	0.75452	0.8044	-0.31401	0.098795	0.36579	1.3233	0.40414	0.14621	0.85654	0.86011	-0.21741	0.060442	0.49233	1.2621	0.33587	0.63186	0.99034	1.0683	0.095309	0.65537	0.86904	0.95538	-0.065851	0.99037	0.99657	0.99914	-0.0012479	0.88344	0.95799	0.99362	-0.0092275	0.50592	0.79363	1.1503	0.20195	0.68027	0.96871	0.96694	-0.048508
L-Acetylcarnitine_pos	0.06744	0.58468	0.80946	-0.30497	0.03069	0.28773	0.83053	-0.2679	0.17101	0.77686	0.81155	-0.30125	0.82385	0.94321	0.98439	-0.022703	0.76412	0.94371	1.0206	0.029389	0.27983	0.69687	0.90768	-0.13975	0.57041	0.99034	0.93133	-0.10264	0.55891	0.84878	0.97266	-0.039999	0.17181	0.94807	1.2381	0.30814	0.22435	0.65692	1.0828	0.11481	0.097677	0.57261	1.2861	0.36297	0.56653	0.93599	1.0658	0.091899
Pyridoxamine_pos	0.06771	0.58468	0.654	-0.61264	0.85106	0.91433	1.1252	0.17015	0.079952	0.75452	0.78692	-0.34572	0.017383	0.26458	2.5686	1.361	0.80406	0.95045	0.97891	-0.030753	0.30644	0.69687	1.4028	0.48832	0.25219	0.99034	0.72792	-0.45816	0.56314	0.85231	1.227	0.29517	0.64223	0.94807	1.0855	0.11839	0.085991	0.537	1.7236	0.78544	0.20643	0.67645	1.4077	0.49337	0.054184	0.75509	2.1478	1.1028
Octadiecadienoylcarnitine_pos	0.070524	0.58468	0.62275	-0.68327	0.13045	0.42974	0.64603	-0.63032	0.10572	0.75452	0.63933	-0.64536	0.12162	0.40566	0.60649	-0.72144	0.59822	0.88885	0.94283	-0.084928	0.04454	0.44435	0.49539	-1.0134	0.80773	0.99034	0.98911	-0.015796	0.47915	0.83954	0.86221	-0.21389	0.37704	0.94807	1.4476	0.53362	0.62873	0.86402	1.1261	0.17133	0.05417	0.51885	1.6644	0.735	0.49154	0.92756	1.3398	0.42204
Ribulose 5-Phosphate_Neg	0.071049	0.58468	0.85515	-0.22575	0.11575	0.40832	1.3106	0.39018	0.16032	0.77686	1.1018	0.13989	0.01312	0.26458	1.5663	0.64738	0.017756	0.85654	1.2008	0.26396	0.010086	0.36477	1.5603	0.64179	0.58646	0.99034	0.92905	-0.10618	0.98067	0.99016	1.0285	0.040484	0.93589	0.9961	0.993	-0.010138	0.23509	0.65796	1.235	0.30449	0.94168	0.97891	1.0076	0.01089	0.74009	0.96871	1.0435	0.061376
Octanoylcarnitine_pos	0.072693	0.58468	0.45065	-1.1499	0.15646	0.46115	0.62335	-0.68188	0.072202	0.75452	0.45936	-1.1223	0.28611	0.63771	0.83828	-0.2545	0.079514	0.85654	0.57478	-0.79891	0.48122	0.80033	0.85068	-0.23331	0.12953	0.99034	1.7515	0.80861	0.75572	0.90768	0.888	-0.17137	0.066746	0.94807	2.2927	1.197	0.88819	0.95799	0.85456	-0.22675	0.17624	0.65108	2.2362	1.161	0.50885	0.92756	0.73618	-0.44187
Uracil_Neg	0.074788	0.58468	0.74123	-0.432	0.77594	0.8951	1.1278	0.17351	0.74246	0.90741	0.94768	-0.077522	0.89197	0.95474	1.0576	0.080815	0.61798	0.89377	0.92354	-0.11476	0.36172	0.72639	1.2619	0.33558	0.33699	0.99034	1.2589	0.33212	0.20116	0.70222	0.67971	-0.557	0.25888	0.94807	1.3131	0.39303	0.50722	0.78627	1.0776	0.10777	0.19938	0.67645	1.4281	0.51406	0.68277	0.96871	0.95645	-0.064231
5-Hydroxytryptophan_pos	0.076076	0.58468	0.74679	-0.42122	0.026286	0.28773	0.8232	-0.28069	0.15593	0.77686	0.64287	-0.63739	0.18069	0.49663	0.863	-0.21256	0.31813	0.87225	0.84703	-0.23952	0.014644	0.36477	0.78403	-0.35102	0.65966	0.99034	0.95665	-0.063942	0.29185	0.74756	0.93792	-0.092457	0.16944	0.94807	1.1807	0.23962	0.26136	0.65796	0.96621	-0.049597	0.032276	0.51885	1.3878	0.4728	0.68118	0.96871	1.0587	0.082324
Pseudouridine_Neg	0.076308	0.58468	0.65469	-0.61113	0.90698	0.95607	1.0163	0.023338	0.43796	0.87727	0.84077	-0.25022	0.19101	0.51361	1.1777	0.23599	0.56854	0.88885	1.0486	0.068527	0.67363	0.87463	0.94074	-0.088134	0.96956	0.99034	1.0265	0.037783	0.96643	0.99016	1.0215	0.03067	0.53173	0.94807	1.2052	0.26928	0.98623	0.99512	1.0824	0.11421	0.21338	0.67645	1.3546	0.43788	0.13903	0.85958	1.1791	0.23766
Trans-4-Hydroxy-L-Proline_pos	0.076627	0.58468	0.86833	-0.20368	0.62882	0.80863	1.0394	0.055733	0.10744	0.75452	0.8604	-0.21691	0.44369	0.74923	0.88323	-0.17914	0.43755	0.88133	0.92643	-0.11024	0.90994	0.96659	1.1156	0.15786	0.30771	0.99034	1.1372	0.18546	0.044304	0.4333	1.4261	0.51205	0.052222	0.94807	1.4944	0.57959	0.18445	0.63079	1.2439	0.3149	0.029473	0.51885	1.6194	0.6955	0.32864	0.89633	1.1921	0.25355
Pantothenate_pos	0.076733	0.58468	0.77398	-0.36963	0.40534	0.6586	0.85289	-0.22957	0.20895	0.79329	0.81274	-0.29913	0.1772	0.49611	1.2361	0.3058	0.22167	0.85654	0.83986	-0.25179	0.39162	0.75298	1.216	0.28218	0.086302	0.99034	1.3011	0.37968	0.8958	0.9578	1.026	0.037005	0.10224	0.94807	1.2162	0.28237	0.27959	0.66272	1.1156	0.15786	0.023851	0.51885	1.4048	0.49036	0.54214	0.93599	1.0485	0.068272
Cortisol_pos	0.080103	0.58468	0.77405	-0.3695	0.29878	0.55773	0.90533	-0.14348	0.0090965	0.74418	0.61921	-0.6915	0.63618	0.84009	1.0624	0.08737	0.24869	0.85654	0.85856	-0.22001	0.5308	0.82529	1.0418	0.05902	0.56884	0.99034	1.0957	0.13183	0.29964	0.74994	1.0571	0.080155	0.47107	0.94807	1.1621	0.21678	0.99612	0.99835	1.0037	0.0053509	0.071844	0.51885	1.3022	0.3809	0.078697	0.76644	1.1037	0.14236
Monosaccharide_pos	0.080296	0.58468	0.85659	-0.22332	0.73764	0.88359	0.94734	-0.078045	0.12081	0.75452	0.86919	-0.20226	0.92894	0.96332	0.99202	-0.011563	0.50263	0.88133	0.94729	-0.078118	0.73647	0.89284	1.0432	0.060948	0.78173	0.99034	1.0119	0.017012	0.25543	0.74026	0.84765	-0.23845	0.23474	0.94807	1.1908	0.2519	0.93813	0.9684	0.98215	-0.025985	0.10538	0.5727	1.2349	0.30435	0.89633	0.99333	1.0253	0.036099
Xanthine_Neg	0.082477	0.58468	1.4764	0.56209	0.14264	0.45321	2.0799	1.0565	0.55772	0.88108	1.2862	0.36308	0.93021	0.96332	1.0356	0.050401	0.36094	0.87342	1.6706	0.74035	0.32439	0.70228	1.5715	0.65217	0.17918	0.99034	1.5991	0.67729	0.70359	0.88666	0.79172	-0.33693	0.8816	0.9961	0.9357	-0.095877	0.60721	0.85544	1.3036	0.38248	0.67387	0.85167	1.2271	0.29524	0.20169	0.86825	1.5314	0.61488
Homocysteic Acid_Neg	0.082534	0.58468	1.6902	0.75723	0.078604	0.34524	1.9198	0.94094	0.42151	0.87727	1.52	0.60406	0.0046378	0.26458	3.2351	1.6938	0.1164	0.85654	1.7208	0.78311	0.028242	0.40824	2.263	1.1782	0.37456	0.99034	0.77632	-0.36527	0.76652	0.91013	1.1021	0.14032	0.51612	0.94807	0.83183	-0.26564	0.2787	0.66272	1.4231	0.50905	0.80204	0.924	1.0734	0.10218	0.33684	0.89633	1.5148	0.59912
Phosphogluconate_Neg	0.083381	0.58468	0.62847	-0.67008	0.29753	0.55773	1.6247	0.70022	0.85083	0.93655	1.0321	0.045636	0.03183	0.26458	4.1622	2.0573	0.1939	0.85654	1.4975	0.58252	0.085393	0.52791	2.7261	1.4468	0.63857	0.99034	0.79184	-0.33672	0.37689	0.80051	1.658	0.72941	0.29923	0.94807	1.3358	0.41773	0.14545	0.59525	2.0545	1.0388	0.14297	0.61296	1.7011	0.7665	0.27316	0.86825	2.0408	1.0292
N6-Acetyllysine_pos	0.083975	0.58468	0.7703	-0.37651	0.0014797	0.12754	0.68581	-0.54411	0.12541	0.75452	0.83209	-0.26519	0.49036	0.77267	1.0739	0.10289	0.15937	0.85654	0.91972	-0.12074	0.57794	0.84771	0.93301	-0.10003	0.058123	0.99034	1.2539	0.32637	0.084785	0.51377	1.2168	0.28305	0.11359	0.94807	1.3622	0.44591	0.097188	0.53754	1.1198	0.16318	0.013339	0.5013	1.4683	0.55414	0.96583	0.99919	1.01	0.014381
Glucosamine 6-Phosphate_pos	0.084092	0.58468	0.433	-1.2076	0.17416	0.46988	1.9635	0.97341	0.80607	0.91901	0.967	-0.048412	0.71739	0.88052	1.5301	0.61362	0.76033	0.94371	0.86606	-0.20747	0.28495	0.69687	1.9307	0.94915	0.1814	0.99034	0.59289	-0.75417	0.55636	0.84878	1.8008	0.84861	0.89008	0.9961	1.015	0.021509	0.068451	0.537	2.4305	1.2813	0.53137	0.80789	1.1032	0.14173	0.0043884	0.37568	3.7376	1.9021
3-Hydroxycinnaminic Acid_Neg	0.084095	0.58468	1.7184	0.78106	0.56713	0.76299	1.0904	0.12488	0.2565	0.83877	1.8831	0.91311	0.87686	0.95117	1.083	0.11498	0.11984	0.85654	0.67418	-0.56879	0.6425	0.86606	1.2311	0.29998	0.67827	0.99034	1.123	0.16735	0.99575	0.99692	0.97655	-0.034239	0.1074	0.94807	0.73168	-0.45072	0.058761	0.537	0.52195	-0.93803	0.047744	0.51885	0.68519	-0.54542	0.028247	0.75509	0.49577	-1.0122
Ethylmalonic Acid_Neg	0.08658	0.58468	0.89399	-0.16167	0.39354	0.65057	0.9574	-0.062809	0.078796	0.75452	0.88144	-0.18206	0.98545	0.9921	1.002	0.0028546	0.88265	0.97182	0.99257	-0.010765	0.52053	0.81823	1.0535	0.075185	0.79525	0.99034	0.97326	-0.039103	0.68739	0.88666	0.96019	-0.058613	0.32799	0.94807	1.0904	0.1249	0.8445	0.93864	1.0123	0.017597	0.91464	0.96883	1.0017	0.0024438	0.26322	0.86825	0.90038	-0.15139
Thyroxine_pos	0.087422	0.58468	0.8138	-0.29725	0.1953	0.47631	0.86863	-0.20318	0.63845	0.90741	0.9527	-0.069905	0.24489	0.58011	0.82636	-0.27516	0.30523	0.87225	0.89294	-0.16337	0.84635	0.94791	0.97514	-0.036315	0.66138	0.99034	0.96231	-0.055423	0.064532	0.49554	1.2352	0.3047	0.048148	0.94807	1.1677	0.22371	0.010966	0.28898	1.3673	0.45136	0.51843	0.79363	1.0948	0.1307	0.13053	0.8572	1.1902	0.25125
Uridine Triphosphate_Neg	0.087441	0.58468	0.81272	-0.29917	0.052616	0.31792	1.7029	0.76803	0.95239	0.97546	1.0061	0.0088398	0.022589	0.26458	1.9599	0.9708	0.83036	0.95877	1.034	0.048198	0.04577	0.44435	1.7244	0.7861	0.39343	0.99034	0.86712	-0.20569	0.84931	0.94156	0.93565	-0.095963	0.89035	0.9961	0.99054	-0.013709	0.4248	0.76094	1.1635	0.21842	0.34979	0.74289	0.90299	-0.14722	0.78758	0.97923	0.89458	-0.16072
Phosphoenolpyruvate_Neg	0.091546	0.60313	0.72883	-0.45634	0.76687	0.89362	1.0779	0.10827	0.77554	0.91347	1.0464	0.065376	0.66814	0.85322	0.94049	-0.088508	0.14036	0.85654	0.71948	-0.47498	0.045606	0.44435	0.70155	-0.51139	0.44993	0.99034	1.2423	0.31298	0.0092226	0.2108	0.58386	-0.77631	0.85616	0.98855	0.94184	-0.086444	0.059448	0.537	0.72235	-0.46923	0.76107	0.89834	0.93526	-0.096554	0.0050315	0.37568	0.69696	-0.52086
Orotidylic Acid_Neg	0.093667	0.60461	0.82066	-0.28514	0.29799	0.55773	1.1444	0.19455	0.26774	0.85069	0.76243	-0.39132	0.70617	0.87779	1.0519	0.072942	0.84216	0.96002	1.0448	0.063238	0.57901	0.84771	1.079	0.10963	0.22396	0.99034	0.75935	-0.39717	0.36223	0.80051	0.88564	-0.17521	0.97477	0.9961	1.019	0.027185	0.34192	0.70196	0.90045	-0.15128	0.77429	0.90605	0.97983	-0.029391	0.69629	0.96871	0.96835	-0.046394
Aminoadipate_pos	0.097984	0.60461	0.54356	-0.87948	0.097265	0.39011	0.38463	-1.3785	0.32756	0.86557	0.78749	-0.34467	0.10649	0.37862	1.8278	0.87011	0.18116	0.85654	0.64687	-0.62846	0.53682	0.82697	0.77334	-0.37082	0.92009	0.99034	0.96957	-0.044578	0.93841	0.97091	0.99708	-0.0042235	0.95252	0.9961	1.0343	0.048653	0.43822	0.76094	1.0523	0.073482	0.27904	0.69465	1.3631	0.44694	0.116	0.83819	0.55915	-0.83869
Acetyl-Amino Sugars_pos	0.098635	0.60461	0.86905	-0.20248	0.50577	0.73405	1.1241	0.16871	0.21282	0.80063	0.932	-0.1016	0.40036	0.74735	1.2075	0.27201	0.20731	0.85654	0.92882	-0.10652	0.93012	0.97875	1.0553	0.077596	0.94427	0.99034	0.99574	-0.0061637	0.45517	0.83915	0.86659	-0.20658	0.32685	0.94807	1.0928	0.12805	0.12041	0.58857	1.1146	0.15659	0.019984	0.51885	1.1977	0.26029	0.49773	0.92756	1.0999	0.13742
Homocystine_pos	0.099189	0.60461	1.0928	0.12808	0.57721	0.76923	0.96785	-0.047144	0.49743	0.87727	0.97269	-0.039955	0.64957	0.84595	0.96149	-0.056662	0.9765	0.99185	0.99967	-0.00047619	0.10302	0.52791	0.92375	-0.11442	0.35493	0.99034	0.94136	-0.087181	0.20348	0.70222	0.94999	-0.074019	0.80364	0.97971	1.0526	0.073923	0.51878	0.79868	0.95816	-0.061663	0.44679	0.77931	1.0904	0.12491	0.75165	0.96871	0.98382	-0.023536
Thiamine Pyrophosphate_Neg	0.099723	0.60461	0.77824	-0.36171	0.097527	0.39011	1.3701	0.4543	0.51712	0.87906	0.95009	-0.073858	0.073839	0.34203	1.3226	0.40339	0.86877	0.96951	0.99442	-0.0080784	0.73682	0.89284	1.0431	0.060889	0.2086	0.99034	0.85514	-0.22577	0.91754	0.96667	1.028	0.039823	0.089956	0.94807	0.82414	-0.27904	0.46452	0.76516	1.0767	0.10664	0.034378	0.51885	0.74202	-0.43047	0.91405	0.99333	0.97972	-0.029564
Aminobenzoates/Trigonelline_pos	0.099869	0.60461	1.191	0.25221	0.28888	0.55082	0.93712	-0.093695	0.92028	0.96741	1.0431	0.060895	0.42291	0.74923	1.1152	0.15725	0.27185	0.85912	0.87815	-0.18747	0.44416	0.78303	1.3055	0.38458	0.26716	0.99034	0.88671	-0.17346	0.0018183	0.11637	1.3122	0.39203	0.64321	0.94807	0.94732	-0.078071	0.28482	0.66806	1.1553	0.20831	0.67066	0.85166	0.95203	-0.070927	0.40323	0.9098	1.1769	0.23501
Tetradecadienoylcarnitine_pos	0.10194	0.60891	0.6444	-0.63397	0.18766	0.47198	0.70199	-0.51049	0.18726	0.77686	0.64421	-0.6344	0.084885	0.35215	0.61366	-0.7045	0.58686	0.88885	0.92893	-0.10637	0.0088518	0.36477	0.44904	-1.1551	0.25168	0.99034	0.76491	-0.38663	0.24642	0.74026	1.1662	0.22178	0.2931	0.94807	1.2722	0.3473	0.2184	0.64608	1.1714	0.22818	0.050141	0.51885	1.5283	0.61196	0.2529	0.86825	1.3755	0.45997
Lipoamide_pos_2	0.10549	0.62113	0.86045	-0.21684	0.66445	0.82347	1.0331	0.046979	0.053219	0.75452	0.7891	-0.34171	0.49596	0.77267	1.1425	0.19224	0.157	0.85654	0.8283	-0.27177	0.46074	0.79696	1.0817	0.11326	0.35863	0.99034	1.0857	0.11857	0.70513	0.88666	1.0316	0.044822	0.35304	0.94807	1.0854	0.1182	0.53179	0.80759	1.046	0.0649	0.068358	0.51885	1.2507	0.32272	0.5656	0.93599	1.0839	0.11623
3-Hydroxy-3-Methylglutaryl-CoA_Neg	0.10989	0.62113	0.78045	-0.35762	0.065169	0.31792	1.4133	0.49906	0.3956	0.87727	1.1109	0.15172	0.015468	0.26458	1.5746	0.65499	0.11796	0.85654	1.2267	0.29484	0.048815	0.44631	1.384	0.46883	0.69777	0.99034	0.93552	-0.096161	0.96279	0.99016	0.98274	-0.025114	0.9304	0.9961	0.99075	-0.013401	0.20276	0.63081	1.2932	0.37092	0.42087	0.77771	1.102	0.14016	0.46042	0.92473	1.1512	0.20319
3-Nitrotyrosine_Neg	0.11078	0.62113	0.55944	-0.83795	0.97094	0.9946	1.0853	0.11812	0.38561	0.87727	1.154	0.2067	0.048547	0.27906	2.3072	1.2061	0.77846	0.94371	1.0142	0.020361	0.3476	0.72096	1.5539	0.63593	0.66309	0.99034	1.0341	0.048352	0.81045	0.92153	1.0843	0.11673	0.82304	0.97971	0.71957	-0.47479	0.92626	0.96504	1.2008	0.26399	0.66819	0.85166	0.92942	-0.1056	0.066432	0.75509	1.4554	0.54146
GMP_Neg	0.11287	0.62113	0.92094	-0.11882	0.28188	0.54436	1.0928	0.12809	0.57398	0.88976	0.98206	-0.026118	0.43451	0.74923	1.0614	0.085935	0.21966	0.85654	0.95733	-0.062906	0.44061	0.78022	1.0391	0.055396	0.79109	0.99034	0.98752	-0.018124	0.38845	0.80051	0.93968	-0.089766	0.58524	0.94807	0.97357	-0.038645	0.19721	0.63081	0.91558	-0.12724	0.48778	0.79363	0.95974	-0.059287	0.08913	0.81491	0.88769	-0.17187
5-Hydroxymethyl-2'-Deoxyuridine_Neg	0.11502	0.62113	0.82151	-0.28365	0.49643	0.73055	1.1332	0.18042	0.04448	0.75452	0.82944	-0.26979	0.86616	0.94742	1.0092	0.013215	0.11934	0.85654	0.79213	-0.33618	0.40236	0.75375	1.0908	0.12537	0.44364	0.99034	1.0779	0.10823	0.40324	0.80647	0.93091	-0.10329	0.99571	0.99657	0.99813	-0.0026968	0.47121	0.76516	0.9308	-0.10346	0.8542	0.93998	0.98847	-0.016725	0.79583	0.98414	0.98623	-0.02001
Methylguanosines_pos	0.11522	0.62113	0.77806	-0.36205	0.0051435	0.25533	0.73707	-0.44013	0.31293	0.86557	0.85701	-0.22261	0.5549	0.81506	0.95446	-0.067245	0.82318	0.95788	0.95969	-0.059364	0.14688	0.55908	0.87486	-0.19288	0.42636	0.99034	0.88397	-0.17792	0.15122	0.65775	1.1356	0.18349	0.16328	0.94807	1.2538	0.32631	0.032095	0.43973	1.2597	0.33312	0.10819	0.57572	1.2887	0.36595	0.35477	0.89633	1.1927	0.25418
Uridine Diphosphate Glucose_Neg	0.11561	0.62113	0.67483	-0.56739	0.16298	0.46976	1.6071	0.68443	0.22273	0.81693	0.74462	-0.42542	0.86551	0.94742	1.041	0.057998	0.059176	0.85654	0.59808	-0.7416	0.96224	0.99328	1.0768	0.10671	0.41916	0.99034	1.495	0.58018	0.046425	0.4333	0.53218	-0.91002	0.78272	0.9787	0.95577	-0.065271	0.062308	0.537	0.71952	-0.47488	0.93899	0.97891	1.0151	0.021572	0.0087736	0.56151	0.50806	-0.97693
D-Sedoheptulose 7-Phosphate_Neg	0.11742	0.62113	0.74135	-0.43177	0.77982	0.8951	0.92439	-0.11343	0.67958	0.90741	0.94179	-0.086523	0.033799	0.26458	1.9347	0.95213	0.55939	0.88885	1.1261	0.17132	0.30348	0.69687	1.391	0.47614	0.98567	0.99034	0.9459	-0.080246	0.47461	0.83954	1.2275	0.29577	0.52001	0.94807	1.1166	0.15907	0.18056	0.62378	1.5562	0.638	0.54148	0.81495	1.1202	0.16371	0.19215	0.86825	1.5629	0.64425
Guanosine Monophosphate_Neg	0.11761	0.62113	1.6039	0.68155	0.94867	0.98738	1.0489	0.068816	0.94186	0.97546	1.0431	0.060814	0.17574	0.49611	1.5219	0.6059	0.44028	0.88133	1.3236	0.4045	0.74338	0.89525	1.182	0.24125	0.079001	0.99034	2.697	1.4314	0.066367	0.49554	0.74293	-0.42869	0.0042915	0.94807	2.7734	1.4717	0.17338	0.62066	0.6611	-0.59706	#N/A	#N/A	#N/A	#N/A	0.0017697	0.37568	0.58218	-0.78047
Allanoate_pos	0.11785	0.62113	1.1606	0.21487	0.56513	0.76259	0.94133	-0.08722	0.55006	0.88108	1.0964	0.13279	0.81267	0.9432	1.0242	0.034507	0.51092	0.88133	0.9151	-0.128	0.48282	0.80033	1.0508	0.071538	0.64749	0.99034	1.0957	0.13189	0.88833	0.9578	0.98482	-0.022073	0.29026	0.94807	1.2247	0.2924	0.1887	0.63081	1.1772	0.23531	0.077398	0.5223	1.3574	0.44081	0.65955	0.96871	1.1593	0.2132
Ureidosuccinic Acid_Neg	0.12156	0.63322	0.77192	-0.37348	0.042334	0.31792	1.3797	0.46438	0.27926	0.85145	0.83627	-0.25796	0.022277	0.26458	1.4889	0.5743	0.60513	0.88885	0.91733	-0.12448	0.13753	0.55908	3.5352	1.8218	0.50524	0.99034	1.1348	0.1824	0.16196	0.69103	1.566	0.64709	0.21505	0.94807	1.222	0.28919	0.11507	0.5728	1.7699	0.82365	0.20543	0.67645	1.2718	0.34683	0.17509	0.86825	1.4408	0.52687
FAD_pos	0.12984	0.66068	0.61722	-0.69615	0.80741	0.89709	1.0219	0.031193	0.31288	0.86557	0.73129	-0.45148	0.24201	0.57671	1.1863	0.24647	0.32429	0.87225	0.73633	-0.44158	0.61865	0.8614	0.93498	-0.096998	0.35626	0.99034	1.1296	0.17577	0.63569	0.86804	1.0681	0.094998	0.43769	0.94807	1.114	0.15571	0.73412	0.8996	1.0509	0.071614	0.39729	0.77771	1.142	0.19155	0.20894	0.86825	1.2092	0.27406
Ribose_Neg	0.13176	0.66068	1.7947	0.84371	0.19421	0.47631	0.64491	-0.63283	0.56051	0.88108	1.2875	0.36455	0.95312	0.97045	1.004	0.0057608	0.52253	0.88885	0.73812	-0.43808	0.7775	0.91663	0.95048	-0.073274	0.49904	0.99034	1.5104	0.59497	0.85119	0.94156	1.0537	0.075468	0.97238	0.9961	0.91851	-0.12263	0.77882	0.90477	1.1185	0.16155	0.68772	0.85361	1.274	0.34939	0.74769	0.96871	1.0951	0.13102
1-Methylguanosine_pos	0.13681	0.66068	0.81622	-0.29297	0.013942	0.28391	0.71886	-0.47622	0.32845	0.86557	0.87506	-0.19255	0.21728	0.54769	0.86199	-0.21426	0.74898	0.9399	0.95732	-0.062932	0.21051	0.63873	0.84571	-0.24177	0.36674	0.99034	0.89202	-0.16486	0.085467	0.51377	1.1404	0.18959	0.068468	0.94807	1.3885	0.47348	0.037319	0.47768	1.2943	0.37222	0.058177	0.51885	1.3962	0.48152	0.55437	0.93599	1.091	0.12565
Fructose 1,6-Bisphosphate_Neg	0.1381	0.66068	0.82448	-0.27844	0.37128	0.62768	1.2282	0.29654	0.029389	0.75452	0.74778	-0.41931	0.017452	0.26458	1.3217	0.40235	0.26244	0.85912	0.85964	-0.21819	0.019905	0.39242	1.2494	0.32124	0.13832	0.99034	1.2485	0.32018	0.78249	0.91786	1.0345	0.048997	0.93471	0.9961	1.0088	0.012592	0.6135	0.85623	1.0889	0.12291	0.26418	0.69465	1.1806	0.23958	0.68097	0.96871	1.0466	0.065777
Xanthosine_pos	0.13958	0.66068	0.93298	-0.10009	0.31657	0.57652	0.8883	-0.17088	0.51929	0.87906	0.93952	-0.090001	0.37907	0.72673	1.1014	0.1394	0.60228	0.88885	0.97451	-0.037246	0.94116	0.98056	1.0231	0.032914	0.34585	0.99034	0.93007	-0.10458	0.049854	0.44022	1.2168	0.28304	0.54903	0.94807	1.0954	0.13152	0.030242	0.43973	1.207	0.27145	0.0077801	0.5013	1.3604	0.44401	0.084133	0.78524	1.157	0.21036
Trans-Aconitate_Neg	0.14131	0.66068	0.81267	-0.29926	0.94304	0.9848	1.0199	0.028444	0.2362	0.83103	0.83723	-0.25631	0.31723	0.65306	0.85838	-0.22032	0.52763	0.88885	0.90319	-0.14691	0.81444	0.93557	0.96522	-0.051063	0.59598	0.99034	0.91192	-0.13302	0.014764	0.24678	0.61065	-0.71158	0.66495	0.96142	0.92503	-0.11243	0.044272	0.52195	0.66849	-0.58101	0.99464	0.99687	1.0231	0.032919	0.039133	0.75509	0.64265	-0.6379
NMN_Neg	0.14379	0.66068	1.2106	0.27572	0.25898	0.53042	1.1891	0.24991	0.7724	0.91347	0.96579	-0.050216	0.040354	0.26458	1.4908	0.5761	0.84865	0.96078	0.99422	-0.0083617	0.25996	0.68666	1.1541	0.20674	0.45141	0.99034	0.80592	-0.31129	0.62465	0.86638	0.75667	-0.40226	0.37587	0.94807	0.77298	-0.37149	0.67855	0.88369	1.0154	0.021986	0.13667	0.6104	0.63561	-0.65379	0.59547	0.95667	1.051	0.071697
S-Ribosyl-L-Homocysteine_pos	0.14441	0.66068	1.6042	0.6819	0.36944	0.62692	1.182	0.24123	0.17477	0.77686	1.5018	0.58668	0.55945	0.8164	1.0762	0.10599	0.40508	0.88133	1.5555	0.6374	0.70295	0.87479	0.90984	-0.13632	0.50897	0.99034	1.0908	0.12536	0.89543	0.9578	1.2252	0.29307	0.16125	0.94807	1.7355	0.79537	0.30487	0.67004	1.2842	0.36086	0.12327	0.58618	1.9057	0.93033	0.89801	0.99333	1.2118	0.2771
Ureidopropionate_pos	0.14646	0.66068	0.7928	-0.33497	0.6515	0.8125	0.93071	-0.1036	0.9499	0.97546	1.0541	0.076007	0.17498	0.49611	1.3968	0.48212	0.77432	0.94371	1.0122	0.017556	0.7026	0.87479	1.3077	0.38705	0.44575	0.99034	1.0853	0.11806	0.12092	0.5974	1.4106	0.49627	0.48946	0.94807	1.109	0.14927	0.80687	0.92686	1.049	0.069008	0.07266	0.51885	1.3519	0.43499	0.78126	0.97923	1.067	0.093564
Octenoylcarnitine_pos	0.14691	0.66068	0.90767	-0.13975	0.27676	0.53908	1.2872	0.36419	0.087005	0.75452	0.60888	-0.71578	0.42048	0.74923	1.1739	0.23131	0.12517	0.85654	0.8393	-0.25275	0.33881	0.71598	1.2266	0.29463	0.43693	0.99034	1.1638	0.2188	0.61837	0.86572	0.96558	-0.050531	0.44939	0.94807	1.1568	0.2102	0.29257	0.67004	1.1243	0.16898	0.54359	0.81539	0.79141	-0.3375	0.091155	0.81675	1.1399	0.1889
Glycochenodeoxycholate_Neg	0.14964	0.66068	0.39449	-1.3419	0.79136	0.8951	1.1418	0.19132	0.60345	0.90341	1.0798	0.11079	0.44719	0.74923	0.86342	-0.21186	0.9852	0.99185	1.0368	0.052121	0.23434	0.65615	0.69744	-0.51987	0.81174	0.99034	0.89326	-0.16285	0.88671	0.9578	0.83861	-0.25393	0.74812	0.9787	0.9296	-0.10532	0.79229	0.9148	0.89452	-0.16082	0.44137	0.77931	0.55491	-0.84967	0.93205	0.99333	0.91843	-0.12276
Phosphoglycerates_Neg	0.15026	0.66068	0.76022	-0.39551	0.067783	0.31792	1.6848	0.75258	0.90426	0.95997	1.0095	0.013681	0.20119	0.53019	1.2934	0.37112	0.14147	0.85654	0.7214	-0.47114	0.53716	0.82697	1.1722	0.22921	0.37464	0.99034	1.4801	0.56567	0.025299	0.32409	0.59061	-0.75972	0.64678	0.94807	1.0529	0.074429	0.093602	0.537	0.7203	-0.47334	0.96265	0.98921	0.97403	-0.037963	0.030797	0.75509	0.61869	-0.69272
Metanephrine_pos	0.15066	0.66068	0.85053	-0.23357	0.44417	0.69093	1.1199	0.16333	0.73918	0.90741	0.96372	-0.053313	0.40863	0.74914	1.1849	0.24476	0.93726	0.97854	1.0019	0.0026966	0.31476	0.69687	1.1934	0.25509	0.7885	0.99034	0.98587	-0.020527	0.86186	0.94636	0.96475	-0.051768	0.074769	0.94807	1.2682	0.34273	0.68738	0.88946	1.0586	0.08209	0.11742	0.58618	1.3217	0.40235	0.72461	0.96871	1.0991	0.13626
Phenylalanine_pos	0.1507	0.66068	0.91582	-0.12687	0.40777	0.6595	1.0911	0.12573	0.019057	0.75452	0.78064	-0.35728	0.78896	0.92532	0.97561	-0.035623	0.42733	0.88133	0.89389	-0.16183	0.93069	0.97875	1.0079	0.011292	0.72598	0.99034	0.97099	-0.042466	0.030304	0.36388	1.0705	0.098351	0.15506	0.94807	0.8726	-0.19661	0.088642	0.537	1.0894	0.12356	0.92536	0.97555	0.99388	-0.0088505	0.052802	0.75509	1.0995	0.13683
Taurine_pos	0.15097	0.66068	1.0942	0.12988	0.04985	0.31792	0.62781	-0.6716	0.87815	0.9457	1.0026	0.0037712	0.60544	0.83715	0.89258	-0.16394	0.47521	0.88133	0.87155	-0.19834	0.4299	0.77541	0.83411	-0.26169	0.31015	0.99034	1.4146	0.50043	0.82855	0.9303	1.1126	0.15391	0.59564	0.94807	1.5404	0.62331	0.50293	0.78627	1.1496	0.20119	0.16591	0.64476	1.7517	0.80875	0.39132	0.90735	0.55903	-0.839
Quinolinic Acid_Neg	0.15174	0.66068	0.94114	-0.087515	0.080791	0.34802	1.1034	0.14191	0.52783	0.87906	0.98066	-0.02817	0.21144	0.54754	1.0601	0.084238	0.87023	0.96951	1.0051	0.0073042	0.24808	0.67116	1.0491	0.069218	0.78323	0.99034	1.0147	0.021065	0.24413	0.74026	0.93647	-0.094697	0.54558	0.94807	0.9791	-0.030476	0.41697	0.75656	0.95896	-0.060461	0.63437	0.83647	0.97896	-0.030677	0.31697	0.89633	0.95541	-0.065805
3-Indolepropionate_pos	0.153	0.66068	0.46561	-1.1028	0.066941	0.31792	2.5357	1.3424	0.17781	0.77686	0.48966	-1.0301	0.17483	0.49611	1.9165	0.93845	0.63683	0.89717	0.79561	-0.32986	0.9679	0.99545	1.3084	0.38777	0.23748	0.99034	0.55501	-0.84942	0.13983	0.64266	0.45488	-1.1364	0.27438	0.94807	0.56835	-0.81514	0.57099	0.84559	0.78948	-0.34103	0.070157	0.51885	0.35079	-1.5113	0.38856	0.90735	1.2454	0.31659
2-Aminobenzoic Acid_pos	0.15458	0.66068	1.221	0.28808	0.25008	0.5177	1.1045	0.14335	0.4777	0.87727	1.1974	0.2599	0.095885	0.36562	1.2698	0.34457	0.64567	0.90178	0.9534	-0.068843	0.35324	0.72251	1.4035	0.48906	0.033225	0.99034	0.82158	-0.28353	0.0098765	0.2108	1.3685	0.4526	0.039608	0.94807	0.86039	-0.21694	0.14208	0.59525	1.2156	0.28162	0.33333	0.73466	0.86303	-0.21252	0.43737	0.92473	1.1718	0.22867
Argininosuccinic Acid_Neg	0.15534	0.66068	0.78508	-0.34909	0.17088	0.46988	1.3022	0.38092	0.0017174	0.74418	0.64972	-0.62212	0.8843	0.95474	1.0118	0.016989	0.0012603	0.28231	0.74678	-0.42125	0.21458	0.64087	1.2798	0.35595	0.66517	0.99034	0.93542	-0.096308	0.66923	0.86904	1.0825	0.11432	0.60311	0.94807	0.92055	-0.11944	0.093958	0.537	1.4507	0.5367	0.98986	0.99655	0.99582	-0.0060418	0.55381	0.93599	1.0836	0.11578
Erythrose_Neg	0.15693	0.66068	0.91263	-0.1319	0.013854	0.28391	1.2545	0.32706	0.50106	0.87727	0.96125	-0.057014	0.039438	0.26458	1.1815	0.2406	0.92763	0.97783	1.0039	0.0056172	0.024683	0.40824	1.3117	0.39143	0.56954	0.99034	1.0584	0.081853	0.72275	0.88828	1.0466	0.065757	0.75309	0.9787	1.0334	0.047438	0.45361	0.76516	1.0621	0.08692	0.15689	0.62617	1.1369	0.18511	0.93513	0.99333	0.98843	-0.016791
Indole_pos	0.15926	0.66068	0.84752	-0.23868	0.22707	0.49912	1.1648	0.22008	0.057399	0.75452	0.72016	-0.47361	0.58636	0.82499	1.1059	0.14519	0.18223	0.85654	0.8083	-0.30704	0.4583	0.79633	1.0817	0.11325	0.42315	0.99034	1.0692	0.096568	0.28586	0.74026	1.1071	0.14682	0.49138	0.94807	1.0629	0.087954	0.089593	0.537	1.1743	0.23181	0.026192	0.51885	1.2833	0.35988	0.25191	0.86825	1.1326	0.17969
N-Acetylputrescine_pos	0.15927	0.66068	1.1823	0.2416	0.16358	0.46976	1.2834	0.35996	0.81859	0.92054	1.0165	0.023662	0.70035	0.87755	1.0389	0.055051	0.47177	0.88133	1.0514	0.072355	0.30803	0.69687	1.1038	0.14246	0.90089	0.99034	0.94855	-0.076212	0.38324	0.80051	1.068	0.09491	0.51413	0.94807	1.1233	0.16778	0.17605	0.62066	1.2164	0.28256	0.63289	0.83647	1.0537	0.075432	0.58097	0.94645	1.0845	0.11699
Folate_pos	0.16179	0.66499	0.88355	-0.17862	0.84487	0.91006	0.96678	-0.048746	0.35323	0.87727	0.88084	-0.18305	0.35414	0.70202	1.1206	0.16425	0.35046	0.87225	0.79647	-0.32831	0.2173	0.64131	1.2345	0.3039	0.49887	0.99034	1.1691	0.22536	0.030865	0.36388	1.3068	0.38601	0.30669	0.94807	1.1964	0.25868	0.77169	0.90477	1.0874	0.12087	0.25709	0.69153	1.0848	0.11738	0.23846	0.86825	1.1382	0.18681
Homocystine_Neg	0.16544	0.6665	0.89567	-0.15896	0.023011	0.28773	1.2016	0.26492	0.88481	0.94942	1.0083	0.011936	0.48515	0.77267	1.0494	0.069611	0.89223	0.97182	1.0052	0.0074431	0.37565	0.73472	1.0731	0.10178	0.94862	0.99034	1.003	0.0043796	0.39803	0.80621	0.93651	-0.094628	0.58799	0.94807	0.97045	-0.043275	0.9164	0.95923	0.99692	-0.0044565	0.60269	0.83171	1.0382	0.054056	0.55646	0.93599	0.96026	-0.05851
Suberic Acid_Neg	0.16604	0.6665	0.93313	-0.099847	0.053066	0.31792	1.1867	0.24696	0.92239	0.96741	0.99559	-0.0063813	0.62585	0.84005	1.0334	0.047426	0.46825	0.88133	1.0698	0.09737	0.34486	0.71887	1.0688	0.096029	0.90743	0.99034	1.0148	0.021212	0.42996	0.82945	0.94688	-0.078753	0.25614	0.94807	0.92652	-0.1101	0.24706	0.65796	0.91968	-0.1208	0.50257	0.79363	0.96276	-0.05475	0.35613	0.89633	0.95515	-0.066202
Isobutyrylglycine_Neg	0.16663	0.6665	0.42205	-1.2445	0.11332	0.40832	0.67467	-0.56775	0.74519	0.90741	0.74859	-0.41776	0.29792	0.64476	0.89108	-0.16637	0.62238	0.89377	0.68933	-0.53674	0.064543	0.49851	0.63523	-0.65466	0.7252	0.99034	0.74967	-0.41567	0.034302	0.38419	0.61027	-0.71249	0.34103	0.94807	1.2456	0.31681	0.14694	0.59525	0.83076	-0.2675	0.24483	0.67645	1.4356	0.52164	0.19185	0.86825	0.7431	-0.42837
N-Alpha-Acetyl-L-Lysine_pos	0.16891	0.66886	0.88205	-0.18107	0.99701	0.99761	0.98726	-0.018502	0.63043	0.90741	0.95038	-0.07343	0.049209	0.27906	1.6626	0.73348	0.2381	0.85654	1.4579	0.54392	0.27792	0.69687	1.6145	0.69107	0.90272	0.99034	0.96213	-0.055689	0.69819	0.88666	1.0796	0.11052	0.16797	0.94807	1.451	0.53703	0.53597	0.8087	1.1854	0.2454	0.079064	0.5223	1.5237	0.60756	0.89269	0.99333	1.1971	0.25955
NAD_pos	0.17144	0.66886	0.88409	-0.17773	0.083302	0.35207	0.83288	-0.26382	0.19282	0.77686	0.90391	-0.14575	0.66394	0.85322	0.95865	-0.060925	0.034753	0.85654	0.85128	-0.23229	0.1433	0.55908	0.84082	-0.25013	0.79247	0.99034	1.037	0.052406	0.27433	0.74026	0.92767	-0.10831	0.79447	0.9787	0.97707	-0.033462	0.21121	0.63935	0.91342	-0.13065	0.020817	0.51885	1.2748	0.35027	0.58096	0.94645	0.96178	-0.056215
Thymidine_pos	0.17596	0.66886	0.71673	-0.4805	0.018752	0.28773	0.72678	-0.4604	0.78146	0.91347	0.91925	-0.12148	0.86036	0.94742	1.0117	0.016815	0.53248	0.88885	0.8572	-0.2223	0.36482	0.72639	0.88985	-0.16837	0.93607	0.99034	1.0005	0.0007441	0.0025628	0.14352	1.3219	0.40266	0.51353	0.94807	0.92523	-0.11211	0.85064	0.93864	0.99061	-0.01361	0.65017	0.83996	1.0565	0.079288	0.95786	0.99919	1.0328	0.046579
Inositol_Neg	0.17701	0.66886	1.6624	0.73326	0.62847	0.80863	1.322	0.40269	0.16395	0.77686	1.6434	0.71671	0.34268	0.69154	1.7893	0.83939	0.16051	0.85654	1.731	0.79162	0.13088	0.55659	1.7932	0.84258	0.74109	0.99034	1.017	0.024299	0.52102	0.83956	0.87602	-0.19097	0.74973	0.9787	1.0062	0.0088929	0.74408	0.90338	0.92766	-0.10833	0.52233	0.79687	1.1202	0.16374	0.70567	0.96871	0.9366	-0.094497
Dimethylarginine_pos	0.17752	0.66886	0.8801	-0.18425	0.18506	0.47106	0.83426	-0.26143	0.19043	0.77686	0.84948	-0.23535	0.58744	0.82499	1.0638	0.089255	0.10954	0.85654	0.82739	-0.27337	0.8213	0.93835	0.97742	-0.032955	0.51439	0.99034	0.91003	-0.13602	0.031918	0.36664	1.2021	0.26553	0.15943	0.94807	1.2962	0.37434	0.022564	0.40434	1.3118	0.3916	0.16747	0.64476	1.1859	0.24604	0.21881	0.86825	1.2561	0.32899
Aminosugar Phosphate_Neg	0.17774	0.66886	0.64925	-0.62314	0.17413	0.46988	1.3136	0.39357	0.44127	0.87727	1.1297	0.1759	0.035345	0.26458	2.6075	1.3827	0.061698	0.85654	1.6094	0.68656	0.18256	0.61673	1.4738	0.5595	0.86063	0.99034	0.91106	-0.13439	0.34111	0.77856	1.363	0.44677	0.11594	0.94807	1.6056	0.68309	0.0042307	0.27418	1.8075	0.85402	0.2027	0.67645	1.6012	0.67913	0.21351	0.86825	1.592	0.67082
UDP-Glucose_Neg	0.17864	0.66886	0.73565	-0.4429	0.31332	0.57378	1.554	0.63602	0.73091	0.90741	0.9182	-0.12311	0.4401	0.74923	0.81339	-0.29798	0.12592	0.85654	0.66975	-0.5783	0.81075	0.93557	0.92374	-0.11445	0.22376	0.99034	1.5729	0.65346	0.077626	0.51377	0.58765	-0.76697	0.69732	0.97287	0.97151	-0.041699	0.0043329	0.27418	0.49766	-1.0068	0.87558	0.94544	1.0412	0.058288	0.048087	0.75509	0.53791	-0.89456
dAMP_pos	0.17956	0.66886	1.196	0.25823	0.41389	0.66222	1.2313	0.30017	0.28533	0.85509	0.7382	-0.43792	0.25013	0.58668	0.56779	-0.81658	0.92201	0.97712	1.0292	0.041589	0.99404	0.99881	1.0128	0.018398	0.28253	0.99034	1.2784	0.3543	0.63791	0.86804	1.3916	0.4767	0.33053	0.94807	1.2455	0.31668	0.65629	0.87766	0.9041	-0.14545	0.98385	0.99636	1.0227	0.03245	0.83118	0.99333	0.90976	-0.13644
dGDP_pos	0.18096	0.66886	0.59093	-0.75894	0.1223	0.41506	2.4163	1.2728	0.52541	0.87906	0.85678	-0.223	0.6262	0.84005	1.6135	0.69024	0.24124	0.85654	0.61794	-0.69447	0.39949	0.75375	1.4923	0.57756	0.078551	0.99034	0.50149	-0.9957	0.27205	0.74026	1.3507	0.43369	0.48075	0.94807	0.88554	-0.17537	0.94612	0.97439	1.0964	0.1328	0.047629	0.51885	0.36276	-1.4629	0.45025	0.92473	0.85166	-0.23166
L-Ornithine_pos	0.18214	0.66886	2.3221	1.2154	0.064472	0.31792	4.2548	2.0891	0.55072	0.88108	1.6445	0.71763	0.070565	0.34203	7.0174	2.8109	0.061171	0.85654	2.6521	1.4071	0.074326	0.49851	6.072	2.6022	0.20284	0.99034	2.255	1.1731	0.051097	0.44022	2.8493	1.5106	0.58849	0.94807	1.4617	0.54766	0.41903	0.75695	0.45444	-1.1378	0.04851	0.51885	3.1281	1.6453	0.50464	0.92756	1.776	0.82861
Urea_pos	0.18498	0.67376	1.0861	0.11921	0.99666	0.99761	0.99769	-0.0033321	0.4124	0.87727	1.08	0.11108	0.079187	0.35215	1.3066	0.38579	0.50102	0.88133	1.088	0.12162	0.31641	0.69687	1.1636	0.21865	0.014484	0.99034	0.87589	-0.19117	0.65611	0.86904	1.069	0.096224	0.90514	0.9961	1.0204	0.029157	0.27704	0.66272	1.1614	0.21589	0.73891	0.88078	1.0371	0.052526	0.41957	0.92473	1.1435	0.19342
Sedpheptulose Bisphosphates_Neg	0.18778	0.67841	0.74043	-0.43357	0.14914	0.4536	1.3492	0.4321	0.67689	0.90741	0.90812	-0.13905	0.016697	0.26458	1.8857	0.91507	0.586	0.88885	1.0869	0.1202	0.034513	0.43819	1.6931	0.75966	0.63221	0.99034	1.0767	0.10667	0.85532	0.9438	1.0446	0.062987	0.19082	0.94807	1.3062	0.38541	0.014319	0.30546	1.4806	0.56623	0.10553	0.5727	1.4591	0.5451	0.25972	0.86825	1.3473	0.43009
Ascorbate_Neg	0.19032	0.67986	0.46692	-1.0988	0.22752	0.49912	1.7256	0.78706	0.69668	0.90741	0.77302	-0.37142	0.58377	0.82499	1.05	0.070427	0.59219	0.88885	0.72074	-0.47244	0.88192	0.9561	1.0069	0.0099563	0.52946	0.99034	0.7281	-0.45779	0.49842	0.83954	0.92898	-0.10628	0.98176	0.99654	0.85671	-0.22312	0.058646	0.537	2.483	1.3121	0.64817	0.83981	0.75941	-0.39706	0.25071	0.86825	1.5013	0.58625
Isocitrate_Neg	0.19414	0.67986	0.90891	-0.13779	0.36547	0.62492	1.0675	0.094243	0.1887	0.77686	0.87892	-0.1862	0.12504	0.4089	1.1687	0.22494	0.72872	0.92719	0.98071	-0.028096	0.091235	0.52791	1.2152	0.28123	0.63203	0.99034	1.0485	0.068331	0.085179	0.51377	0.88499	-0.17627	0.77813	0.9787	1.0229	0.032729	0.41089	0.7544	0.96152	-0.056609	0.57614	0.83171	1.0961	0.13243	0.30601	0.89021	0.65704	-0.60594
Hexanoylcarnitine_pos	0.19612	0.67986	0.74898	-0.41701	0.32501	0.58949	0.81344	-0.29789	0.13723	0.76648	0.71099	-0.49209	0.5428	0.80588	0.90986	-0.13629	0.57918	0.88885	0.92376	-0.11441	0.044203	0.44435	0.69402	-0.52694	0.13043	0.99034	0.78403	-0.35102	0.12135	0.5974	1.0972	0.1338	0.12973	0.94807	1.2585	0.33175	0.062463	0.537	1.2915	0.36901	0.075165	0.5223	1.5451	0.62766	0.073021	0.75509	1.3073	0.38659
L-Tryptophan_Neg	0.19748	0.67986	0.84892	-0.2363	0.021901	0.28773	1.4134	0.49916	0.031656	0.75452	0.799	-0.32373	0.14201	0.44536	1.3008	0.37943	0.34025	0.87225	0.89387	-0.16186	0.072616	0.49851	1.1491	0.20046	0.59568	0.99034	1.0762	0.10597	0.69573	0.88666	0.96537	-0.050846	0.60837	0.94807	0.86706	-0.20579	0.66245	0.88176	1.0506	0.071271	0.641	0.83832	1.0578	0.081061	0.74623	0.96871	1.0631	0.088225
3-Indoxyl Sulfate_Neg	0.1975	0.67986	0.55929	-0.83833	0.0019929	0.12754	0.42031	-1.2505	0.42954	0.87727	0.70318	-0.50803	0.27764	0.63139	0.81796	-0.2899	0.76492	0.94371	1.0217	0.030927	0.080755	0.51683	1.3861	0.47108	0.18216	0.99034	0.77703	-0.36395	0.052292	0.44202	0.64493	-0.63279	0.22355	0.94807	0.7994	-0.32301	0.96372	0.98573	0.99793	-0.0029949	0.2181	0.67645	0.80585	-0.31142	0.27433	0.86825	0.80421	-0.31436
Quinolinate_pos	0.19871	0.67986	1.3053	0.38438	0.72798	0.8801	1.4638	0.54968	0.37743	0.87727	1.0892	0.12327	0.77443	0.91706	1.0556	0.078102	0.40746	0.88133	0.95012	-0.073824	0.12391	0.55015	1.3859	0.47086	0.49155	0.99034	0.80638	-0.31046	0.13281	0.62699	1.1431	0.19298	0.7828	0.9787	0.89562	-0.15905	0.25629	0.65796	0.7838	-0.35144	0.82976	0.93475	0.90222	-0.14845	0.96711	0.99919	1.0084	0.012103
6-Phosphogluconate_Neg	0.19895	0.67986	0.73278	-0.44855	0.22093	0.49736	1.7429	0.80149	0.65086	0.90741	1.1278	0.17353	0.020619	0.26458	4.8102	2.2661	0.15362	0.85654	1.7319	0.79238	0.055681	0.47457	2.989	1.5797	0.6416	0.99034	0.78613	-0.34717	0.59638	0.86465	1.4365	0.52257	0.34039	0.94807	1.2915	0.36905	0.071578	0.537	2.0897	1.0633	0.17954	0.65182	1.6255	0.70093	0.24265	0.86825	2.0184	1.0132
3-Methylhistamine_pos	0.20049	0.67986	0.81422	-0.29651	0.53321	0.74124	0.90208	-0.14867	0.73525	0.90741	0.9637	-0.05334	0.22005	0.54769	1.2373	0.30716	0.12237	0.85654	0.81442	-0.29616	0.97107	0.99545	1.0323	0.045891	0.74275	0.99034	1.0231	0.033008	0.52087	0.83956	1.104	0.14271	0.54671	0.94807	1.1665	0.22224	0.093865	0.537	1.381	0.46571	0.14398	0.61296	1.269	0.34373	0.061225	0.75509	1.2789	0.35485
5-Hydroxytryptophan_Neg	0.20187	0.67986	0.79133	-0.33764	0.17761	0.46988	1.1744	0.23196	0.080048	0.75452	0.74715	-0.42052	0.21937	0.54769	1.2088	0.27361	0.050105	0.85654	0.67101	-0.57559	0.19534	0.6251	1.1444	0.19458	0.54367	0.99034	1.1096	0.15001	0.019785	0.29546	0.83317	-0.26332	0.18572	0.94807	0.81607	-0.29324	0.03906	0.47778	0.75212	-0.41096	0.97103	0.99325	1.0578	0.081088	0.059064	0.75509	0.78087	-0.35685
Homocysteine_pos	0.20555	0.67986	0.71027	-0.49357	0.056352	0.31792	1.2513	0.32342	0.45137	0.87727	0.8168	-0.29194	0.068418	0.34203	1.321	0.40168	0.53369	0.88885	0.84223	-0.24772	0.4586	0.79633	1.1832	0.24265	0.34409	0.99034	1.1293	0.17546	0.18649	0.70208	0.84282	-0.2467	0.55778	0.94807	1.0938	0.12938	0.17646	0.62066	0.83081	-0.26741	0.70822	0.86496	1.0742	0.10321	0.85481	0.99333	1.0144	0.020681
Margaric Acid_Neg	0.20582	0.67986	0.92732	-0.10886	0.10898	0.40807	1.1158	0.15801	0.68542	0.90741	0.98356	-0.023918	0.4121	0.74914	1.066	0.092214	0.93588	0.97854	1.0046	0.0065974	0.43444	0.77541	1.0502	0.070663	0.89767	0.99034	1.013	0.018701	0.25658	0.74026	0.92679	-0.10969	0.24996	0.94807	0.93806	-0.092243	0.36491	0.72336	0.94522	-0.081281	0.39872	0.77771	0.95317	-0.069189	0.26096	0.86825	0.94513	-0.081415
Hexose 6-Phosphate_Neg	0.20839	0.67986	0.86634	-0.207	0.060676	0.31792	1.2939	0.37174	0.89008	0.94942	0.98658	-0.019498	0.028714	0.26458	1.3059	0.38507	0.72828	0.92719	1.0256	0.036427	0.26276	0.68671	1.183	0.24242	0.6686	0.99034	1.0901	0.12451	0.10673	0.57609	0.7424	-0.42973	0.80547	0.97971	1.0157	0.022427	0.99992	0.99992	0.98355	-0.023925	0.78216	0.91049	1.0301	0.042785	0.87756	0.99333	0.96408	-0.052771
Methyl Phenylacetate_Neg	0.2089	0.67986	0.91076	-0.13485	0.1804	0.46988	1.1373	0.18563	0.73984	0.90741	1.0109	0.015598	0.86975	0.94742	1.0096	0.01378	0.67935	0.90705	1.0224	0.031953	0.11597	0.55015	1.1132	0.1547	0.85331	0.99034	1.0193	0.027555	0.1718	0.70208	0.94293	-0.08478	0.74838	0.9787	0.97473	-0.036929	0.98031	0.99138	1.0086	0.012389	0.98745	0.99636	0.99847	-0.0022052	0.90828	0.99333	0.99575	-0.006146
2-Aminobutyric Acid_pos	0.21025	0.67986	0.79763	-0.32621	0.28893	0.55082	1.1787	0.23717	0.31674	0.86557	0.84389	-0.24488	0.01717	0.26458	1.459	0.54498	0.94288	0.97991	1.0457	0.064425	0.080081	0.51683	1.4078	0.49348	0.48744	0.99034	0.83126	-0.26663	0.080193	0.51377	1.2613	0.3349	0.82882	0.97971	1.0205	0.02923	0.0078888	0.27418	1.8202	0.86406	0.47345	0.78967	1.1276	0.1732	0.18319	0.86825	1.4413	0.52739
N2,N2-Dimethylguanosine_pos	0.21094	0.67986	0.86242	-0.21354	0.09691	0.39011	0.84998	-0.2345	0.054635	0.75452	0.78543	-0.34845	0.62266	0.84005	0.95591	-0.065055	0.55445	0.88885	0.9198	-0.1206	0.10028	0.52791	0.85566	-0.22488	0.24621	0.99034	0.87436	-0.1937	0.098901	0.56086	1.2377	0.30761	0.47579	0.94807	1.0763	0.10608	0.14742	0.59525	1.1938	0.25551	0.20379	0.67645	1.355	0.4383	0.053835	0.75509	1.2923	0.36995
Phenylglyoxylic Acid_Neg	0.21335	0.68273	0.84656	-0.24031	0.32857	0.59113	0.93198	-0.10163	0.70209	0.90741	1.0952	0.13115	0.31384	0.65306	0.897	-0.15683	0.25055	0.85654	0.86069	-0.21644	0.41221	0.75375	0.94144	-0.087057	0.86444	0.99034	0.98677	-0.019221	0.32391	0.77152	0.87172	-0.19806	0.48869	0.94807	0.93909	-0.09066	0.37529	0.72785	0.88557	-0.17533	0.88641	0.94791	0.98758	-0.018024	0.33754	0.89633	0.89047	-0.16736
Cytosine_pos	0.21615	0.68489	0.62849	-0.67004	0.27603	0.53908	0.68561	-0.54453	0.37057	0.87727	0.925	-0.11247	0.29383	0.64215	0.70128	-0.51193	0.50712	0.88133	0.94674	-0.078958	0.64374	0.86606	0.95704	-0.063356	0.96853	0.99034	0.95392	-0.068055	0.94553	0.97603	0.99488	-0.0073994	0.30516	0.94807	1.4231	0.50906	0.70152	0.89794	1.0529	0.074345	0.28027	0.69465	1.4599	0.54586	0.46017	0.92473	0.90775	-0.13963
3,5-Diiodothyronine_pos	0.21771	0.68489	1.3934	0.4786	0.010226	0.26871	0.67958	-0.55728	0.60607	0.90341	0.83457	-0.26089	0.4611	0.75669	0.91346	-0.13058	0.83943	0.95935	1.0483	0.068041	0.20266	0.63873	0.80976	-0.30444	0.18996	0.99034	1.6176	0.69385	0.93747	0.97091	1.0037	0.0053183	0.35611	0.94807	1.3975	0.4829	0.32868	0.6913	0.76043	-0.39512	0.48568	0.79363	1.343	0.42547	0.45179	0.92473	0.91822	-0.12309
Cytidine Monophosphate_Neg	0.22116	0.68489	0.70565	-0.50297	0.2064	0.48246	1.3406	0.42283	0.55456	0.88108	1.0793	0.11015	0.90844	0.9576	1.001	0.001435	0.26304	0.85912	0.8793	-0.18558	0.54352	0.83105	1.0736	0.10247	0.6711	0.99034	1.1243	0.16897	0.035566	0.38863	0.78579	-0.34779	0.29788	0.94807	0.85465	-0.22659	0.15625	0.60344	0.85318	-0.22908	0.86419	0.94217	0.97133	-0.041969	0.03725	0.75509	0.77568	-0.36647
Acetylcysteine_Neg	0.22119	0.68489	0.39786	-1.3297	0.12175	0.41506	0.64285	-0.63744	0.59564	0.90341	0.61438	-0.7028	0.79353	0.92578	1.1588	0.21269	0.95052	0.98119	0.89093	-0.16662	0.57578	0.84771	0.88619	-0.17431	0.848	0.99034	1.0717	0.099966	0.83969	0.93345	0.9626	-0.054997	0.58141	0.94807	1.1874	0.24782	0.89732	0.95923	0.97104	-0.042403	0.6414	0.83832	1.3927	0.47792	0.53871	0.93599	1.1934	0.25506
Kynurenic Acid_pos	0.22659	0.68489	0.94583	-0.080354	0.27094	0.53908	1.3706	0.45482	0.57769	0.89244	0.94421	-0.08282	0.234	0.56103	1.4655	0.55135	0.13654	0.85654	0.64501	-0.63261	0.20653	0.63873	1.5618	0.64319	0.16546	0.99034	1.0648	0.090584	0.97953	0.99016	0.99852	-0.0021303	0.42181	0.94807	0.96079	-0.057703	0.41256	0.7544	0.94983	-0.074264	0.29908	0.70419	1.1307	0.17722	0.46684	0.92473	0.86684	-0.20616
Homoserine_Neg	0.227	0.68489	0.83633	-0.25786	0.010796	0.26871	1.7057	0.77038	0.51728	0.87906	1.1506	0.20239	0.01674	0.26458	1.6766	0.74555	0.50765	0.88133	1.0811	0.11251	0.011055	0.36477	1.8761	0.90777	0.27338	0.99034	1.2568	0.32973	0.35553	0.79628	1.1738	0.23123	0.45146	0.94807	1.1731	0.23034	0.017638	0.32925	1.3143	0.39428	0.18457	0.6548	1.3749	0.45929	0.048915	0.75509	1.2002	0.26325
L-Methionine_pos	0.22751	0.68489	1.1302	0.17662	0.80874	0.89709	1.0468	0.066052	0.72096	0.90741	1.0546	0.076714	0.06964	0.34203	1.4291	0.51511	0.57613	0.88885	0.94515	-0.081391	0.38719	0.74948	1.3451	0.42771	0.88545	0.99034	1.0036	0.005212	0.00088474	0.10941	1.3846	0.46945	0.16358	0.94807	0.82746	-0.27323	0.53612	0.8087	0.9481	-0.076895	0.6299	0.83647	0.93194	-0.1017	0.84105	0.99333	0.99224	-0.011235
NAD_pos_1	0.22759	0.68489	0.85649	-0.22349	0.48667	0.72588	0.86075	-0.21634	0.080494	0.75452	0.86115	-0.21566	0.48564	0.77267	0.86011	-0.21741	0.090032	0.85654	0.87333	-0.1954	0.45421	0.79487	0.84816	-0.2376	0.5551	0.99034	1.067	0.09358	0.9035	0.96144	1.0071	0.010251	0.59057	0.94807	1.085	0.11766	0.47139	0.76516	0.93001	-0.10468	0.60104	0.83171	1.0897	0.12394	0.58988	0.95629	0.94779	-0.077368
3-Phenyllactic Acid_Neg	0.22781	0.68489	0.852	-0.23108	0.17679	0.46988	1.2107	0.27588	0.61505	0.90341	1.047	0.066265	0.17668	0.49611	1.2236	0.29108	0.44189	0.88133	1.0838	0.11609	0.55896	0.84315	1.0694	0.096865	0.2649	0.99034	0.85329	-0.22889	0.58414	0.85522	0.94858	-0.076165	0.48944	0.94807	0.92743	-0.10869	0.45642	0.76516	1.0654	0.091418	0.17324	0.65073	0.85829	-0.22046	0.21877	0.86825	1.1071	0.14677
Homogentisate_Neg	0.23058	0.68489	0.95663	-0.063965	0.42929	0.68303	0.96778	-0.047244	0.99859	0.99859	1.0002	0.00022	0.94295	0.96447	1.0066	0.0094691	0.93557	0.97854	1.0018	0.0026418	0.30781	0.69687	0.95847	-0.061202	0.62437	0.99034	1.0314	0.044599	0.37502	0.80051	0.96048	-0.058174	0.50385	0.94807	1.0307	0.043593	0.18101	0.62378	0.9565	-0.064166	0.23222	0.67645	1.0612	0.085762	0.23775	0.86825	0.95375	-0.068324
Ascorbate/2-Isopropylmalic Acid_Neg	0.23313	0.68489	0.5142	-0.9596	0.84506	0.91006	0.9433	-0.084208	0.40967	0.87727	0.61681	-0.69709	0.89214	0.95474	1.0296	0.042095	0.48377	0.88133	0.65978	-0.59994	0.90237	0.96253	0.93519	-0.096661	0.91672	0.99034	1.0706	0.098361	0.39049	0.80051	0.78261	-0.35364	0.3399	0.94807	1.3935	0.47875	0.63876	0.87014	1.1304	0.17684	0.2254	0.67645	1.8753	0.90714	0.91828	0.99333	1.0508	0.07144
Guanosine Diphosphate_pos	0.23341	0.68489	0.5341	-0.90482	0.23691	0.50301	0.64151	-0.64047	0.24389	0.83103	0.70944	-0.49525	0.72824	0.88655	1.0141	0.020161	0.062918	0.85654	0.50182	-0.99476	0.10698	0.52791	0.49632	-1.0107	0.68855	0.99034	1.5366	0.61975	0.17988	0.70208	0.44732	-1.1606	0.72352	0.9787	1.077	0.10698	0.10535	0.54946	0.40442	-1.3061	0.27888	0.69465	1.5211	0.60512	0.014932	0.74327	0.40314	-1.3106
2-Deoxyguanosine 5-Monophosphate_pos	0.2339	0.68489	0.7256	-0.46275	0.36816	0.62692	0.79514	-0.33072	0.28821	0.85509	1.0674	0.094126	0.46746	0.7606	0.89144	-0.1658	0.37913	0.87552	0.8296	-0.26952	0.98756	0.99881	0.98731	-0.018427	0.75479	0.99034	0.98019	-0.028869	0.43783	0.83274	0.95647	-0.06421	0.74126	0.9787	1.0381	0.053973	0.6235	0.86402	0.96086	-0.057606	0.32969	0.73466	1.0973	0.13395	0.31952	0.89633	0.9309	-0.1033
Hydrocinnamic Acid_Neg	0.2386	0.69411	1.3694	0.45355	0.60437	0.79169	1.2359	0.30558	0.67565	0.90741	1.0346	0.049136	0.25972	0.59977	0.6806	-0.55511	0.28289	0.86215	1.9729	0.98035	0.66099	0.87115	1.1856	0.24558	0.80784	0.99034	0.89616	-0.15817	0.37083	0.80051	0.54941	-0.86404	0.94078	0.9961	0.93782	-0.092621	0.26436	0.65796	1.4141	0.4999	0.93157	0.9782	1.0915	0.12625	0.93927	0.99479	0.93913	-0.090605
Adipic Acid_Neg	0.24392	0.70499	0.88258	-0.18021	0.74196	0.88404	1.0444	0.062743	0.73391	0.90741	0.9685	-0.046175	0.30606	0.65306	0.91504	-0.1281	0.87902	0.97182	1.042	0.059305	0.31472	0.69687	0.90661	-0.14144	0.62986	0.99034	1.0685	0.095619	0.52532	0.83956	0.94817	-0.076779	0.24268	0.94807	0.95247	-0.070248	0.30511	0.67004	0.91733	-0.12449	0.40472	0.77771	0.94829	-0.076594	0.05869	0.75509	0.90949	-0.13688
Linoleic Acid_pos	0.24856	0.7073	0.86615	-0.20732	0.48707	0.72588	0.89464	-0.16063	0.47848	0.87727	0.92374	-0.11444	0.84517	0.94742	0.98289	-0.024902	0.4804	0.88133	0.91583	-0.12685	0.60599	0.86003	0.93767	-0.092844	0.42387	0.99034	0.85993	-0.21771	0.50797	0.83956	1.1398	0.18872	0.61605	0.94807	1.061	0.085399	0.12776	0.59525	1.2133	0.27897	0.35233	0.74289	1.1492	0.20059	0.27678	0.86825	1.17	0.22655
Allantoin_pos	0.24903	0.7073	0.91766	-0.12397	0.004276	0.23946	1.3879	0.47293	0.093133	0.75452	0.83474	-0.2606	0.020775	0.26458	1.4613	0.54729	0.8125	0.95342	1.0519	0.072994	0.14851	0.55908	1.6996	0.76518	0.48321	0.99034	1.0905	0.12503	0.53571	0.83956	1.159	0.21292	0.12454	0.94807	1.3892	0.47423	0.14486	0.59525	1.3013	0.3799	0.0071386	0.5013	1.7676	0.82182	0.3812	0.90513	1.5599	0.64141
N-Acetyl-Aspartate_Neg	0.24945	0.7073	0.79893	-0.32385	0.1907	0.47464	1.458	0.54398	0.96727	0.97819	0.99044	-0.013852	0.0064157	0.26458	1.684	0.7519	0.72154	0.92719	0.92565	-0.11146	0.074018	0.49851	5.3255	2.4129	0.98528	0.99034	0.99108	-0.012924	0.43878	0.83274	1.1666	0.22228	0.95425	0.9961	0.95015	-0.073771	0.2438	0.65796	1.6069	0.68432	0.27246	0.69465	1.224	0.29163	0.066645	0.75509	1.4226	0.50857
GABA_pos	0.25118	0.7073	0.70589	-0.50249	0.2819	0.54436	1.2264	0.29444	0.084769	0.75452	0.44462	-1.1694	0.23276	0.56103	0.64112	-0.64133	0.00028256	0.12659	0.15883	-2.6545	0.66888	0.87463	0.97797	-0.032142	0.78155	0.99034	0.97595	-0.035124	0.37499	0.80051	0.61916	-0.69163	0.42971	0.94807	0.85203	-0.23102	0.72492	0.8996	1.1445	0.19473	0.8273	0.93475	1.1562	0.20937	0.40413	0.9098	1.3093	0.3888
dTMP_pos	0.25261	0.7073	1.5846	0.66415	0.17959	0.46988	1.3888	0.47387	0.16888	0.77686	1.8896	0.91808	0.10364	0.37144	2.4947	1.3189	0.028843	0.85654	3.1628	1.6612	0.22827	0.65338	2.138	1.0962	0.88445	0.99034	1.0492	0.069327	0.33917	0.77856	1.6778	0.74653	0.090412	0.94807	2.3125	1.2095	0.70566	0.89909	1.1978	0.26038	0.22443	0.67645	2.9674	1.5692	0.77784	0.97923	1.4089	0.49454
2-Isopropylmalic Acid_Neg	0.25519	0.70895	1.2652	0.33932	0.00094682	0.10604	1.2965	0.37467	0.87629	0.9457	1.0317	0.045083	0.6332	0.84009	0.94708	-0.078444	0.22724	0.85654	0.7102	-0.49371	0.60855	0.86003	0.94266	-0.085189	0.20536	0.99034	0.64416	-0.63452	0.91648	0.96667	0.99705	-0.00426	0.26037	0.94807	0.68031	-0.55573	0.60115	0.8543	0.93838	-0.091751	0.26682	0.69465	0.67837	-0.55987	0.96375	0.99919	1.0053	0.0075669
2-Oxoisoleucine_Neg	0.25756	0.70895	0.94741	-0.077946	0.052382	0.31792	1.1644	0.21959	0.79964	0.91856	0.99402	-0.0086575	0.39869	0.74735	1.0527	0.074064	0.98321	0.99185	1.0007	0.0010522	0.18035	0.61673	1.0737	0.10265	0.73939	0.99034	0.98225	-0.025841	0.38099	0.80051	0.95047	-0.073294	0.15367	0.94807	0.94878	-0.07585	0.3269	0.6913	0.94027	-0.088853	0.55946	0.82388	0.97417	-0.037755	0.19707	0.86825	0.93226	-0.10119
Tetrahydrobiopterin_Neg	0.25794	0.70895	0.72328	-0.46736	0.38019	0.63318	0.71401	-0.48598	0.14063	0.76833	0.5974	-0.74323	0.11292	0.3967	0.51959	-0.94455	0.83734	0.95935	1.1342	0.18162	0.12058	0.55015	0.49123	-1.0255	0.42701	0.99034	0.65973	-0.60004	0.2058	0.70222	0.78776	-0.34418	0.77811	0.9787	0.98508	-0.021691	0.66526	0.88176	0.96748	-0.047694	0.51618	0.79363	1.4205	0.50642	0.00050697	0.22712	1.2784	0.35433
Methionine_pos	0.2623	0.71653	1.2334	0.30263	0.37969	0.63318	1.1881	0.24863	0.82798	0.92054	1.1183	0.16134	0.06066	0.32742	1.6335	0.70799	0.16941	0.85654	0.78868	-0.34248	0.26455	0.68671	1.7986	0.84688	0.27361	0.99034	1.169	0.22528	0.023327	0.31786	1.503	0.58786	0.29373	0.94807	0.83886	-0.25349	0.30274	0.67004	0.90378	-0.14596	0.49827	0.79363	0.87674	-0.18978	0.73935	0.96871	0.97401	-0.037988
D-Ribose 5-Phosphate_Neg	0.26452	0.71822	0.85533	-0.22544	0.058712	0.31792	1.7668	0.8211	0.39735	0.87727	1.1346	0.1822	0.0063115	0.26458	2.274	1.1852	0.11695	0.85654	1.2484	0.32012	0.017996	0.39242	1.9095	0.93322	0.54605	0.99034	0.84104	-0.24976	0.57708	0.85305	1.3067	0.38591	0.45035	0.94807	1.1237	0.16823	0.28847	0.67004	1.2473	0.31883	0.83188	0.93475	1.0076	0.010986	0.48171	0.92756	1.1643	0.21947
Methyladenosine_pos	0.27104	0.72788	0.87287	-0.19616	0.058088	0.31792	0.737	-0.44027	0.70059	0.90741	1.178	0.23636	0.61786	0.84005	1.1187	0.16178	0.16611	0.85654	0.82468	-0.2781	0.99251	0.99881	1.1269	0.17239	0.0071507	0.99034	1.3084	0.38777	0.014089	0.24678	1.6073	0.68462	0.13718	0.94807	1.2623	0.33601	0.5784	0.8468	1.0738	0.10266	0.083443	0.5269	1.386	0.47097	0.78907	0.97923	1.1566	0.20992
N-Acetylalanine_Neg	0.27145	0.72788	0.85771	-0.22144	0.72127	0.87569	1.0267	0.038075	0.94764	0.97546	0.98772	-0.01783	0.51805	0.78994	1.0859	0.11886	0.90674	0.97182	0.98295	-0.024809	0.38812	0.74948	1.1473	0.19822	0.97014	0.99034	0.99673	-0.0047181	0.52673	0.83956	1.1224	0.16661	0.81205	0.97971	1.0114	0.016379	0.45983	0.76516	1.0777	0.10793	0.80607	0.92626	1.0466	0.065733	0.86637	0.99333	1.0088	0.012618
Myoinositol_Neg	0.27296	0.72788	0.85477	-0.22639	0.62153	0.80709	0.92808	-0.10769	0.32598	0.86557	0.8752	-0.19231	0.44106	0.74923	1.0881	0.12176	0.79335	0.94965	0.97019	-0.043659	0.65897	0.87115	1.0686	0.095706	0.43064	0.99034	1.1843	0.24401	0.16156	0.69103	0.72514	-0.46367	0.46464	0.94807	1.1193	0.16264	0.49052	0.77688	0.89649	-0.15764	0.62487	0.83647	1.0745	0.1036	0.98661	0.99919	0.98837	-0.016881
L-2-Hydroxyglutaric Acid_Neg	0.2854	0.75657	0.87857	-0.18677	0.016411	0.28773	1.34	0.42218	0.82628	0.92054	1.0497	0.070019	0.019382	0.26458	1.4119	0.49764	0.9471	0.97991	0.9927	-0.01057	0.069762	0.49851	1.4551	0.54116	0.94483	0.99034	0.99505	-0.0071628	0.58026	0.85305	1.0791	0.10981	0.67393	0.9677	1.052	0.073126	0.54063	0.81004	0.9495	-0.074754	0.38929	0.77771	1.1407	0.18986	0.45655	0.92473	0.93213	-0.1014
N-Acetyltyrosine_Neg	0.2888	0.75674	1.4882	0.57354	0.33662	0.59139	1.2247	0.29237	0.61193	0.90341	0.81378	-0.29729	0.7132	0.87779	1.1039	0.14262	0.77476	0.94371	0.96546	-0.050715	0.04221	0.44435	2.5568	1.3544	0.75449	0.99034	1.2267	0.29483	0.0070044	0.2092	1.6461	0.71908	0.10584	0.94807	0.48301	-1.0499	0.75926	0.90477	0.97212	-0.040794	0.79954	0.924	0.94906	-0.075432	0.51902	0.93599	1.6011	0.67904
Cyclic AMP_Neg	0.28957	0.75674	0.90622	-0.14206	0.060282	0.31792	1.1841	0.24374	0.73876	0.90741	0.97314	-0.039283	0.14691	0.45079	1.1642	0.21929	0.54511	0.88885	0.9489	-0.075673	0.046555	0.44435	1.2001	0.26318	0.46347	0.99034	1.0795	0.1103	0.005291	0.19058	0.65716	-0.60569	0.95758	0.9961	0.99849	-0.0021797	0.069271	0.537	0.79984	-0.32221	0.60923	0.8328	0.94798	-0.077076	0.065934	0.75509	0.83022	-0.26844
3-Hydroxyisovaleric Acid_Neg	0.29169	0.75674	1.9524	0.96527	0.0059946	0.25533	0.31157	-1.6824	0.62156	0.90741	0.72984	-0.45435	0.013806	0.26458	0.49059	-1.0274	0.32556	0.87225	0.57831	-0.79009	0.10097	0.52791	0.57016	-0.81056	0.94875	0.99034	0.87735	-0.18877	0.23324	0.74026	1.5297	0.61323	0.49197	0.94807	0.62494	-0.6782	0.48872	0.77688	0.74396	-0.42671	0.743	0.8833	1.1596	0.21361	0.70301	0.96871	0.83664	-0.25732
7-Methylguanosine_pos	0.29246	0.75674	0.8616	-0.21491	0.018481	0.28773	0.80017	-0.32163	0.54703	0.88108	0.91399	-0.12975	0.41496	0.74914	0.94124	-0.087371	0.97583	0.99185	0.9946	-0.0078129	0.071828	0.49851	0.83076	-0.2675	0.24195	0.99034	0.87809	-0.18757	0.31114	0.76583	1.088	0.12171	0.042579	0.94807	1.3378	0.41989	0.034084	0.44911	1.2658	0.34001	0.053849	0.51885	1.3429	0.42531	0.4833	0.92756	1.1355	0.18334
Dopamine_pos	0.29432	0.75674	1.1663	0.222	0.13549	0.43669	0.81777	-0.29023	0.30124	0.86557	1.2138	0.27948	0.45154	0.74923	0.92258	-0.11626	0.59587	0.88885	0.90459	-0.14466	0.10312	0.52791	0.80364	-0.31538	0.22602	0.99034	0.87708	-0.18922	0.0058496	0.19058	1.3186	0.39905	0.29891	0.94807	1.1901	0.25105	0.16083	0.60344	1.2029	0.26648	0.41559	0.77771	0.93903	-0.090764	0.099469	0.83006	1.2611	0.33464
2-Ketohexanoic Acid_Neg	0.29609	0.75674	0.83722	-0.25633	0.11724	0.41025	1.2788	0.35476	0.39874	0.87727	1.1317	0.17849	0.85703	0.94742	0.9644	-0.052294	0.36262	0.87342	1.1239	0.1685	0.73938	0.89284	1.0377	0.053436	0.65439	0.99034	0.94291	-0.084814	0.4933	0.83954	1.1103	0.15096	0.39517	0.94807	1.1241	0.1688	0.36241	0.72159	1.1077	0.14756	0.22646	0.67645	1.2401	0.31044	0.23987	0.86825	1.1159	0.15819
Glucose-1,6-Bisphosphate_Neg	0.30031	0.75674	0.94225	-0.085819	0.030407	0.28773	1.1362	0.18425	0.54407	0.88108	1.0241	0.034417	0.32737	0.66665	1.0563	0.07898	0.87213	0.96951	1.0058	0.0083912	0.21451	0.64087	1.0746	0.10379	0.8629	0.99034	0.99255	-0.010783	0.2838	0.74026	0.93136	-0.1026	0.42311	0.94807	0.96852	-0.046147	0.4231	0.76094	0.95483	-0.066691	0.40497	0.77771	0.95721	-0.063099	0.15484	0.86825	0.93673	-0.0943
Adenine_Neg	0.30062	0.75674	0.93776	-0.092711	0.18858	0.47198	1.1686	0.22483	0.92551	0.96741	1.002	0.0028369	0.49468	0.77267	1.0448	0.063284	0.40076	0.88133	1.0356	0.050475	0.27178	0.6918	1.0374	0.05301	0.77128	0.99034	1.0211	0.030136	0.20939	0.70222	0.92263	-0.11617	0.20707	0.94807	0.95725	-0.063039	0.20877	0.63624	0.9193	-0.12139	0.84846	0.93708	1.0088	0.0127	0.46671	0.92473	0.95672	-0.063829
3-Methyl-2-Oxovaleric Acid_Neg	0.30067	0.75674	0.83063	-0.26772	0.16866	0.46988	1.2347	0.30418	0.50073	0.87727	1.1082	0.14822	0.82741	0.94321	0.9509	-0.07263	0.44232	0.88133	1.099	0.13619	0.86707	0.95594	1.0112	0.016068	0.67653	0.99034	0.94896	-0.075583	0.48456	0.83954	1.1184	0.16149	0.36068	0.94807	1.126	0.17114	0.37625	0.72785	1.0967	0.13321	0.25205	0.68283	1.2405	0.31088	0.30425	0.89021	1.1107	0.15141
Creatinine_pos	0.30608	0.76348	0.86667	-0.20644	0.8716	0.9297	0.97862	-0.031185	0.79113	0.91347	0.96806	-0.046832	0.072267	0.34203	1.4039	0.48941	0.3622	0.87342	1.1906	0.25163	0.72627	0.89142	1.0845	0.117	0.62957	0.99034	0.94109	-0.087588	0.14968	0.65742	1.2477	0.31928	0.24476	0.94807	1.3206	0.40119	0.073057	0.537	1.4174	0.50322	0.058534	0.51885	1.7313	0.79184	0.34749	0.89633	1.4069	0.49248
Uridine 5-Diphosphate_pos	0.30675	0.76348	0.40103	-1.3182	0.41167	0.66104	1.0576	0.080831	0.68277	0.90741	0.62935	-0.66808	0.53922	0.80588	1.6686	0.73865	0.80077	0.94965	0.8486	-0.23684	0.20991	0.63873	1.7449	0.80314	0.46565	0.99034	1.4246	0.51057	0.8783	0.9578	1.1427	0.19247	0.39726	0.94807	1.3648	0.44868	0.82229	0.93027	0.81586	-0.2936	0.89836	0.95836	1.8207	0.86453	0.60621	0.96306	0.63358	-0.65839
FAD_Neg	0.31354	0.77605	0.71635	-0.48126	0.13844	0.443	1.2595	0.33291	0.77636	0.91347	0.8828	-0.17984	0.44828	0.74923	1.1675	0.22341	0.56508	0.88885	0.81118	-0.3019	0.59982	0.8584	0.9088	-0.13797	0.56988	0.99034	1.0792	0.10992	0.86573	0.94828	0.95344	-0.068793	0.91141	0.9961	1.0004	0.00062921	0.71787	0.8996	1.0383	0.05419	0.56741	0.82748	1.0773	0.10737	0.35484	0.89633	1.1355	0.18339
Deoxycholic Acid_Neg	0.31748	0.78148	2.3803	1.2511	0.46748	0.71723	0.88911	-0.16956	0.99348	0.99794	1.1499	0.20147	0.85014	0.94742	0.99	-0.014496	0.29871	0.87225	2.6752	1.4196	0.26518	0.68671	1.9357	0.95288	0.94612	0.99034	0.99562	-0.0063334	0.25328	0.74026	0.86988	-0.20111	0.3222	0.94807	0.50359	-0.98969	0.37692	0.72785	1.1562	0.20944	0.66889	0.85166	0.99225	-0.011221	0.85275	0.99333	1.9436	0.95875
L-Mandelic Acid_Neg	0.31959	0.78238	0.9279	-0.10795	0.17402	0.46988	1.3999	0.48528	0.27958	0.85145	1.0581	0.081427	0.15141	0.46143	1.1283	0.17419	0.36976	0.87552	1.1202	0.16379	0.62318	0.8614	1.032	0.045473	0.9037	0.99034	1.0243	0.034705	0.4995	0.83954	0.94606	-0.079995	0.85043	0.98791	1.0298	0.042332	0.29784	0.67004	0.94564	-0.080642	0.42837	0.77771	0.93981	-0.089565	0.44247	0.92473	0.96458	-0.052031
Trimethylamine_pos	0.32216	0.78244	1.1419	0.19144	0.069242	0.31792	0.72597	-0.46201	0.16439	0.77686	0.90568	-0.14292	0.093646	0.36562	1.4424	0.52848	0.79556	0.94965	1.026	0.037073	0.39509	0.75375	1.5998	0.67793	0.64109	0.99034	0.95789	-0.062072	0.98224	0.99016	0.99483	-0.0074719	0.4036	0.94807	1.2121	0.27756	0.60009	0.8543	1.1078	0.14767	0.032628	0.51885	1.2976	0.37588	0.86415	0.99333	1.0082	0.011792
M-4-Pyr/Oxypurinol_pos	0.32311	0.78244	1.1692	0.22549	0.06201	0.31792	0.69298	-0.52911	0.45771	0.87727	1.1938	0.25556	0.41337	0.74914	0.88896	-0.1698	0.3461	0.87225	0.8238	-0.27964	0.10515	0.52791	0.74533	-0.42405	0.53963	0.99034	0.90438	-0.145	0.003634	0.1628	1.4329	0.51892	0.23413	0.94807	1.3588	0.4423	0.058706	0.537	1.2689	0.34363	0.90665	0.96265	0.99917	-0.0011968	0.13849	0.85958	1.4041	0.48968
3-Hydroxyanthranilic Acid_pos	0.32562	0.78429	1.1079	0.14782	0.13238	0.42974	0.86981	-0.20123	0.43621	0.87727	1.1434	0.1933	0.70126	0.87755	0.9647	-0.051844	0.46308	0.88133	0.90797	-0.13929	0.1598	0.59165	0.85812	-0.22075	0.42392	0.99034	0.93042	-0.10404	0.021247	0.30705	1.1812	0.2402	0.33714	0.94807	1.1251	0.17005	0.22676	0.65778	1.1492	0.20059	0.71666	0.86815	0.97702	-0.033537	0.059334	0.75509	1.2678	0.34229
dCTP_Neg	0.33185	0.79463	0.73414	-0.44588	0.78118	0.8951	0.97187	-0.041159	0.70001	0.90741	1.0645	0.090152	0.45834	0.75492	0.87634	-0.19045	0.45183	0.88133	0.82859	-0.27127	0.64263	0.86606	1.1395	0.18837	0.67394	0.99034	1.1072	0.14692	0.78327	0.91786	0.76707	-0.38258	0.78365	0.9787	0.94729	-0.078128	0.58059	0.84725	1.1691	0.22537	0.59704	0.83171	0.90521	-0.14368	0.75405	0.96871	1.0061	0.0087119
L-Valine_pos	0.33547	0.79463	0.97246	-0.040292	0.9787	0.99499	0.97454	-0.037213	0.30743	0.86557	0.90451	-0.14479	0.99637	0.99742	0.9776	-0.032684	0.02659	0.85654	0.8041	-0.31455	0.93358	0.9795	1.0067	0.0095925	0.65864	0.99034	1.0276	0.039292	0.26279	0.74026	0.95051	-0.073228	0.916	0.9961	1.0222	0.031715	0.48818	0.77688	1.0398	0.056347	0.8014	0.924	1.0111	0.015987	0.39697	0.90735	1.0743	0.10339
B-Alanine_pos	0.33758	0.79463	1.3832	0.46802	0.90493	0.95607	0.88592	-0.17475	0.26691	0.85069	1.7277	0.78888	0.19551	0.51827	1.6071	0.68445	0.52755	0.88885	1.544	0.62665	0.75861	0.90629	1.1186	0.16175	0.95237	0.99034	1.1082	0.14818	0.22728	0.73783	1.3137	0.39367	0.39237	0.94807	0.69925	-0.51612	0.46878	0.76516	0.85605	-0.22423	0.77911	0.9093	1.3177	0.39799	0.61675	0.96871	0.98598	-0.020365
NAD_pos_2	0.33822	0.79463	0.83424	-0.26146	0.51202	0.73405	1.1042	0.14301	0.39518	0.87727	0.85352	-0.2285	0.34535	0.6938	1.1562	0.20936	0.47457	0.88133	0.88312	-0.17932	0.65819	0.87115	1.0861	0.11917	0.72526	0.99034	1.0739	0.10286	0.9653	0.99016	0.99577	-0.0061223	0.45797	0.94807	0.85602	-0.22429	0.88413	0.95799	1.0086	0.012315	0.23414	0.67645	1.2101	0.2751	0.98352	0.99919	1.0062	0.0089125
6-Methyladenosine_pos	0.33878	0.79463	1.4908	0.57604	0.25076	0.5177	0.38244	-1.3867	0.5598	0.88108	1.3247	0.40572	0.86576	0.94742	0.89043	-0.16742	0.81757	0.95633	0.93162	-0.10219	0.72226	0.88894	0.65858	-0.60256	0.7747	0.99034	1.1726	0.22969	0.37055	0.80051	1.6269	0.70215	0.86095	0.98899	0.98307	-0.024638	0.31489	0.68679	1.5392	0.62215	0.45137	0.77931	0.82696	-0.27411	0.45712	0.92473	1.3277	0.4089
Propylene Glycol_pos	0.34356	0.79959	1.0896	0.12382	0.19563	0.47631	0.90305	-0.14712	0.21759	0.80561	0.93232	-0.1011	0.90371	0.95712	1.0275	0.03914	0.74382	0.93869	1.0248	0.035296	0.9248	0.97715	0.99475	-0.0075887	0.056997	0.99034	0.87107	-0.19914	0.19553	0.70222	1.0429	0.060571	0.70797	0.97292	1.0614	0.085935	0.82849	0.93492	1.0162	0.023236	0.48486	0.79363	1.0663	0.092656	0.84288	0.99333	1.0185	0.026484
N-Acetylglutamine_Neg	0.34943	0.79959	1.1358	0.18365	0.095313	0.39011	1.2937	0.37152	0.04399	0.75452	0.9041	-0.14545	0.0093271	0.26458	1.6238	0.69933	0.63226	0.89636	1.0633	0.088551	0.063807	0.49851	1.6985	0.76424	0.82814	0.99034	1.0158	0.022567	0.28582	0.74026	1.282	0.35842	0.79465	0.9787	0.91539	-0.12755	0.385	0.73519	1.1126	0.15394	0.94402	0.97906	0.98436	-0.022741	0.79742	0.98414	1.1009	0.13864
Normetanephrine_pos_1	0.35381	0.79959	1.5167	0.60094	0.92578	0.97359	0.89341	-0.16261	0.5496	0.88108	1.0886	0.12249	0.95001	0.96949	0.94294	-0.08476	0.68713	0.90705	1.2453	0.31654	0.84381	0.94791	0.99258	-0.010749	0.58678	0.99034	1.3569	0.44028	0.065844	0.49554	1.6216	0.69743	0.51435	0.94807	1.6248	0.70022	0.20017	0.63081	1.588	0.66718	0.1031	0.5727	1.9163	0.93833	0.92363	0.99333	1.2847	0.36143
Glycine_pos_2	0.35478	0.79959	0.73801	-0.43829	0.11965	0.41235	0.80018	-0.3216	0.43259	0.87727	0.77072	-0.37572	0.08067	0.35215	1.3836	0.4684	0.30114	0.87225	1.5214	0.60542	0.82831	0.93835	1.057	0.079972	0.44741	0.99034	0.90842	-0.13857	0.89421	0.9578	1.0061	0.0087555	0.79292	0.9787	1.1332	0.18039	0.75696	0.90477	1.0689	0.096078	0.30089	0.70419	1.876	0.90764	0.70857	0.96871	1.2149	0.28079
L-Tryptophan_pos	0.35527	0.79959	0.97357	-0.038641	0.40988	0.66052	0.93207	-0.10149	0.030311	0.75452	0.89205	-0.16481	0.77268	0.91706	0.97202	-0.040941	0.16976	0.85654	0.91138	-0.13388	0.81092	0.93557	0.97697	-0.033616	0.58271	0.99034	0.97301	-0.039478	0.57609	0.85305	1.0114	0.016356	0.89952	0.9961	1.0163	0.023261	0.43277	0.76094	1.0405	0.057222	0.30059	0.70419	1.0903	0.12471	0.2872	0.86864	1.0655	0.091527
2-Hydroxy-3-Methylbutyrate_pos	0.35576	0.79959	0.74208	-0.43034	0.55496	0.76249	0.82128	-0.28406	0.66155	0.90741	0.88986	-0.16834	0.18366	0.50169	1.4306	0.51664	0.11871	0.85654	0.56331	-0.828	0.20952	0.63873	1.3903	0.47537	0.49686	0.99034	1.2532	0.32561	0.5199	0.83956	0.81398	-0.29694	0.17995	0.94807	1.478	0.56364	0.74645	0.90381	0.94761	-0.077636	0.46959	0.78912	1.2782	0.35406	0.23242	0.86825	1.3136	0.3935
Methylmalonate_Neg	0.35754	0.79959	3.0984	1.6315	0.02077	0.28773	0.32127	-1.6382	0.50173	0.87727	0.79448	-0.33192	0.015725	0.26458	0.40059	-1.3198	0.4319	0.88133	0.70847	-0.49722	0.6541	0.87115	0.97887	-0.030812	0.33262	0.99034	1.2227	0.29002	0.93044	0.96939	1.14	0.18901	0.56273	0.94807	0.86124	-0.21552	0.76412	0.90477	0.8345	-0.26101	0.39752	0.77771	1.1537	0.20631	0.88469	0.99333	0.88488	-0.17645
2-Aminoisobutyrate_pos	0.35758	0.79959	0.8483	-0.23735	0.27501	0.53908	1.185	0.24483	0.60916	0.90341	0.92196	-0.11722	0.010119	0.26458	1.4439	0.52992	0.66909	0.90705	1.135	0.18275	0.047609	0.44435	1.4457	0.53173	0.53629	0.99034	0.83464	-0.26077	0.11508	0.58715	1.2158	0.28191	0.92791	0.9961	0.98891	-0.016089	0.0042979	0.27418	1.8106	0.85647	0.46751	0.78859	1.1341	0.1816	0.16096	0.86825	1.4605	0.54642
Dihydroxyacetone Phosphate_pos	0.3585	0.79959	0.79314	-0.33435	0.32897	0.59113	1.0548	0.076977	0.012959	0.74418	0.79955	-0.32274	0.43615	0.74923	0.96329	-0.053951	0.023227	0.85654	0.81724	-0.29116	0.4375	0.77779	1.0788	0.10939	0.29555	0.99034	0.87914	-0.18584	0.99692	0.99692	1.0039	0.0056677	0.47895	0.94807	1.0684	0.095518	0.53169	0.80759	1.0599	0.083876	0.68857	0.85361	1.0438	0.061814	0.78527	0.97923	0.98305	-0.024664
Oxoglutarate_Neg	0.361	0.79959	1.1788	0.23734	0.054684	0.31792	1.424	0.50998	0.92854	0.96741	0.99615	-0.0055668	0.58096	0.82499	1.165	0.22032	0.68827	0.90705	1.0899	0.12415	0.24237	0.66861	1.1304	0.17682	0.96161	0.99034	1.0078	0.01126	0.20942	0.70222	1.3403	0.42253	0.84783	0.98791	0.95409	-0.067801	0.39072	0.73548	1.0873	0.1208	0.35981	0.75508	1.2662	0.34046	0.86535	0.99333	1.0307	0.043691
N6-Trimethyllysine_pos	0.36435	0.79959	0.92271	-0.11605	0.50973	0.73405	1.1702	0.22675	0.62794	0.90741	0.9511	-0.072325	0.017074	0.26458	1.9283	0.94732	0.73626	0.93177	1.109	0.1492	0.19159	0.62198	1.6714	0.74106	0.85839	0.99034	0.9553	-0.065976	0.58076	0.85305	1.1354	0.18326	0.19659	0.94807	1.3465	0.42924	0.38924	0.73548	1.2999	0.37843	0.046786	0.51885	1.5308	0.61427	0.93568	0.99333	1.137	0.18527
Nicotinamide Oxide_pos	0.36652	0.79959	0.69969	-0.51521	0.055892	0.31792	0.70698	-0.50025	0.68508	0.90741	1.0359	0.050842	0.96047	0.97351	1.0252	0.035842	0.66368	0.90705	0.83655	-0.25748	0.034719	0.43819	0.57925	-0.78774	0.97024	0.99034	1.0453	0.063921	0.038696	0.40316	1.5206	0.60462	0.16221	0.94807	1.5868	0.6661	0.84855	0.93864	1.087	0.12036	0.58436	0.83171	1.3349	0.41671	0.36517	0.90025	1.4014	0.48691
N-Acetylglucosamine_pos	0.36921	0.79959	0.74619	-0.42238	0.53608	0.74124	1.2752	0.35076	0.68241	0.90741	0.85461	-0.22667	0.55278	0.81462	1.3468	0.42958	0.74795	0.9399	0.89144	-0.16579	0.13185	0.55659	1.9074	0.93163	0.63219	0.99034	1.0978	0.13465	0.27087	0.74026	0.69108	-0.53307	0.21293	0.94807	1.5604	0.64193	0.67383	0.88369	0.84337	-0.24575	0.62932	0.83647	1.4463	0.5324	0.35172	0.89633	1.2832	0.35974
Citraconic Acid_pos	0.36992	0.79959	1.211	0.27616	0.17369	0.46988	0.68785	-0.53984	0.60775	0.90341	1.0703	0.098007	0.72659	0.88655	0.95994	-0.05898	0.96833	0.98818	1.0028	0.0040628	0.89933	0.96157	1.0215	0.03075	0.76328	0.99034	1.041	0.05798	0.47636	0.83954	1.0558	0.078313	0.41718	0.94807	1.1306	0.17707	0.35889	0.71779	1.1262	0.17152	0.32519	0.73466	1.1409	0.1902	0.66052	0.96871	0.9725	-0.040233
Cysteine_pos	0.37568	0.79959	0.84302	-0.24637	0.14855	0.4536	0.79291	-0.33476	0.49549	0.87727	0.87605	-0.19092	0.81932	0.94321	1.0176	0.02514	0.61147	0.8923	0.9031	-0.14705	0.73861	0.89284	0.94825	-0.076655	0.70431	0.99034	1.0643	0.089887	0.29556	0.74807	0.91102	-0.13444	0.9437	0.9961	1.0187	0.026718	0.45576	0.76516	1.0607	0.085015	0.6049	0.83171	1.1105	0.15117	0.91719	0.99333	1.0339	0.04807
Trimethylamine Oxide_pos	0.37794	0.79959	0.44627	-1.164	0.16602	0.46988	0.73804	-0.43822	0.75284	0.90741	0.6837	-0.54858	0.047687	0.27906	1.8897	0.9182	0.46284	0.88133	1.454	0.53999	0.81445	0.93557	1.2906	0.36802	0.14875	0.99034	0.66377	-0.59124	0.51261	0.83956	0.88237	-0.18054	0.95822	0.9961	1.0906	0.12506	0.88124	0.95799	1.0038	0.0054257	0.62334	0.83647	2.4092	1.2686	0.98487	0.99919	1.6272	0.70243
Gluconolactone_Neg	0.37954	0.79959	0.81023	-0.30359	0.81154	0.89709	0.82423	-0.27888	0.10651	0.75452	0.55425	-0.85138	0.84588	0.94742	0.75919	-0.39747	0.045966	0.85654	0.77766	-0.36278	0.87273	0.95594	0.89107	-0.16639	0.67894	0.99034	1.1551	0.20805	0.48578	0.83954	0.69845	-0.51777	0.25361	0.94807	0.71425	-0.48551	0.91556	0.95923	0.84404	-0.24462	0.46664	0.78859	0.87736	-0.18876	0.642	0.96871	1.1023	0.14058
dCMP_pos	0.38155	0.79959	1.2218	0.28901	0.44096	0.69074	0.9406	-0.088353	0.50296	0.87727	1.1303	0.17666	0.93014	0.96332	0.99759	-0.0034865	0.4665	0.88133	1.1561	0.20922	0.88584	0.9561	0.99322	-0.009816	0.36039	0.99034	1.2391	0.30931	0.12835	0.62499	1.1018	0.13983	0.32696	0.94807	1.2951	0.37306	0.14668	0.59525	1.1254	0.17043	0.1966	0.67645	1.465	0.5509	0.47522	0.92473	1.0589	0.082544
2-Phosphoglycerate_pos	0.38155	0.79959	0.90204	-0.14874	0.64438	0.80863	0.94512	-0.08143	0.48795	0.87727	0.92507	-0.11237	0.23405	0.56103	1.1918	0.25319	0.13715	0.85654	0.80015	-0.32166	0.29042	0.69687	1.1018	0.13989	0.42062	0.99034	1.1256	0.17063	0.29415	0.74807	0.84117	-0.24953	0.25711	0.94807	1.1143	0.15615	0.88495	0.95799	1.0226	0.032304	0.10078	0.57261	1.1719	0.22887	0.56134	0.93599	0.90554	-0.14315
Deoxycytidine Monophosphate_pos	0.38223	0.79959	0.96491	-0.051527	0.78829	0.8951	1.0761	0.10577	0.427	0.87727	0.93825	-0.091951	0.44314	0.74923	1.197	0.25939	0.34924	0.87225	0.92845	-0.10711	0.47539	0.80033	1.1789	0.23741	0.46045	0.99034	1.1712	0.228	0.29201	0.74756	0.75382	-0.40771	0.46686	0.94807	1.1715	0.22833	0.29824	0.67004	0.80054	-0.32096	0.38685	0.77771	1.2473	0.31883	0.4158	0.92217	1.0466	0.06577
Thiamine_pos	0.38274	0.79959	0.84336	-0.24578	0.50044	0.73267	0.94559	-0.080718	0.48648	0.87727	1.09	0.12428	0.15758	0.47046	1.2847	0.36147	0.44898	0.88133	0.8148	-0.29549	0.58307	0.84781	0.93514	-0.096751	0.54023	0.99034	0.89327	-0.16283	0.1689	0.70208	1.2874	0.36449	0.16385	0.94807	1.3649	0.44884	0.69387	0.89326	1.0449	0.063403	0.13231	0.6104	1.4432	0.52927	0.95632	0.99919	0.99503	-0.007192
Cytidine_pos	0.38318	0.79959	0.89199	-0.1649	0.11429	0.40832	0.78922	-0.34151	0.28703	0.85509	0.86704	-0.20582	0.14499	0.44797	0.78582	-0.34773	0.89072	0.97182	0.98252	-0.025439	0.17447	0.60711	0.80063	-0.3208	0.054001	0.99034	1.3391	0.42128	0.83823	0.93345	1.02	0.028622	0.020377	0.94807	1.6819	0.75007	0.032002	0.43973	1.3453	0.42793	0.0019551	0.5013	1.8939	0.92139	0.3895	0.90735	1.2165	0.28278
Succinylcarnitine/3-Hydroxyisovalerylcarnitine_pos	0.3842	0.79959	0.91203	-0.13285	0.070255	0.31792	0.78264	-0.35358	0.40235	0.87727	1.2079	0.27251	0.44499	0.74923	0.91876	-0.12224	0.93923	0.97854	0.99473	-0.0076209	0.63089	0.86171	0.95727	-0.063	0.09874	0.99034	0.79813	-0.32531	0.0501	0.44022	1.1438	0.19386	0.13055	0.94807	1.2194	0.28623	0.062586	0.537	1.2193	0.28609	0.34074	0.73924	1.1692	0.22555	0.22947	0.86825	1.2377	0.30768
Acetylvaline_pos	0.38492	0.79959	1.047	0.066298	0.47051	0.71784	1.115	0.15703	0.55444	0.88108	0.96182	-0.056163	0.54725	0.80913	0.93187	-0.1018	0.67659	0.90705	0.96749	-0.047678	0.74768	0.89802	1.0368	0.052131	0.061042	0.99034	0.85051	-0.2336	0.45071	0.83784	0.86896	-0.20265	0.55418	0.94807	0.9457	-0.080543	0.34394	0.70196	1.085	0.11772	0.59036	0.83171	0.95185	-0.071193	0.81003	0.99152	1.018	0.0258
Hydroxyisocaproic Acid_Neg_2	0.38717	0.79959	0.66285	-0.59325	0.053269	0.31792	1.4484	0.53449	0.828	0.92054	0.86146	-0.21515	0.041051	0.26458	1.3618	0.44553	0.37746	0.87552	1.2167	0.28297	0.0057475	0.36477	1.9275	0.94673	0.63729	0.99034	1.1193	0.16265	0.44425	0.83274	0.91009	-0.13591	0.65686	0.95855	0.90689	-0.141	0.68392	0.8881	0.96148	-0.056669	0.48771	0.79363	1.1254	0.17042	0.54924	0.93599	0.95016	-0.073764
N-Acetylneuraminate_Neg	0.3873	0.79959	0.87147	-0.19848	0.10132	0.39471	1.4051	0.4907	0.24402	0.83103	0.82432	-0.27873	0.03271	0.26458	1.7037	0.76863	0.59078	0.88885	0.91621	-0.12625	0.10139	0.52791	1.4108	0.49649	0.62877	0.99034	0.90028	-0.15155	0.64251	0.86804	1.1482	0.19943	0.60524	0.94807	1.0658	0.091881	0.35887	0.71779	1.1843	0.24402	0.73877	0.88078	1.0767	0.10663	0.39426	0.90735	1.1818	0.24104
Hydroxyisocaproic Acid_Neg_1	0.3908	0.80311	0.70925	-0.49564	0.053617	0.31792	1.4621	0.54802	0.7881	0.91347	0.87322	-0.19558	0.033104	0.26458	1.3307	0.41217	0.32488	0.87225	1.2417	0.31232	0.0063299	0.36477	1.8636	0.89813	0.52019	0.99034	1.1617	0.21624	0.55299	0.84878	0.9361	-0.095261	0.69	0.97063	0.91209	-0.13275	0.63859	0.87014	0.96001	-0.058886	0.48522	0.79363	1.1229	0.16718	0.32281	0.89633	0.93696	-0.093935
O-Acetylserine_pos	0.39276	0.80346	0.95641	-0.064305	0.17872	0.46988	0.88757	-0.17207	0.070052	0.75452	0.90762	-0.13983	0.70691	0.87779	1.0542	0.07621	0.76328	0.94371	1.0254	0.036206	0.62329	0.8614	1.0624	0.087329	0.83547	0.99034	1.0121	0.017361	0.08318	0.51377	1.0685	0.095636	0.26005	0.94807	1.1499	0.20146	0.27938	0.66272	1.0859	0.11883	0.044418	0.51885	1.2924	0.3701	0.552	0.93599	1.1129	0.15438
Guanine_pos_1	0.3976	0.80966	1.1077	0.14759	0.75519	0.89135	1.0342	0.048528	0.92802	0.96741	1.0442	0.06246	0.09346	0.36562	1.314	0.39402	0.26973	0.85912	0.85388	-0.22789	0.39715	0.75375	1.3766	0.4611	0.12383	0.99034	1.1249	0.16976	0.00019663	0.07444	1.2783	0.35419	0.45947	0.94807	0.93417	-0.098247	0.61179	0.85623	0.96157	-0.056531	0.75656	0.89704	0.97273	-0.039896	0.82911	0.99333	1.0486	0.0684
L-Alanine_pos	0.40218	0.81239	1.168	0.224	0.81508	0.89719	1.0107	0.015311	0.39353	0.87727	0.86016	-0.21732	0.20566	0.53604	1.3525	0.43566	0.18369	0.85654	0.80818	-0.30725	0.15388	0.57449	1.6499	0.72234	0.021678	0.99034	1.405	0.49061	0.53605	0.83956	0.94067	-0.088233	0.88709	0.9961	0.99042	-0.013891	0.11164	0.56194	0.8586	-0.21993	0.20955	0.67645	1.2449	0.316	0.12256	0.84471	0.84994	-0.23456
Proline_pos	0.40767	0.81239	1.1864	0.2466	0.031471	0.28773	1.4677	0.5536	0.92374	0.96741	1.1168	0.15941	0.006217	0.26458	2.1845	1.1273	0.47247	0.88133	0.86681	-0.20622	0.12347	0.55015	2.5001	1.322	0.21784	0.99034	1.2452	0.31632	0.014873	0.24678	1.534	0.61731	0.62187	0.94807	0.8885	-0.17056	0.40615	0.7544	1.0953	0.13136	0.6561	0.84401	1.1038	0.14245	0.99095	0.99919	1.0609	0.085248
Methionine Sulfoxide_pos	0.4081	0.81239	1.2416	0.31219	0.02759	0.28773	1.8291	0.87115	0.44595	0.87727	1.6814	0.74969	0.0032276	0.26458	2.5926	1.3744	0.17193	0.85654	0.62987	-0.66688	0.090718	0.52791	2.8153	1.4933	0.71987	0.99034	1.0975	0.1342	0.0080575	0.2108	1.392	0.47712	0.047732	0.94807	0.66193	-0.59526	0.99525	0.99835	1.0313	0.04444	0.1496	0.61966	0.67327	-0.57074	0.74736	0.96871	1.124	0.16862
Aspartate_pos	0.41127	0.81239	0.93233	-0.10109	0.14598	0.4536	0.83526	-0.25971	0.085049	0.75452	0.83588	-0.25863	0.96783	0.97876	1.0082	0.01176	0.6405	0.89951	0.95479	-0.066747	0.58627	0.84781	1.1253	0.17035	0.94805	0.99034	0.98747	-0.018194	0.5189	0.83956	0.97388	-0.038189	0.70453	0.97287	1.0604	0.084636	0.708	0.89909	1.0171	0.024426	0.12295	0.58618	1.182	0.24122	0.50967	0.92756	0.94759	-0.077661
Normetanephrine-H2O_pos	0.41256	0.81239	0.925	-0.11247	0.049915	0.31792	0.84289	-0.24658	0.27196	0.85145	0.92229	-0.1167	0.37653	0.72673	0.91681	-0.12531	0.36881	0.87552	0.9056	-0.14305	0.30776	0.69687	0.87578	-0.19135	0.037095	0.99034	0.86782	-0.20454	0.17074	0.70208	1.0659	0.092014	0.12275	0.94807	1.1309	0.17745	0.19088	0.63081	1.1112	0.15213	0.60455	0.83171	1.1223	0.1664	0.55378	0.93599	1.0888	0.12275
Pyroglutamic Acid_Neg	0.4132	0.81239	0.81531	-0.29457	0.33137	0.59113	0.74884	-0.41727	0.39336	0.87727	0.8175	-0.29071	0.041341	0.26458	1.8087	0.85495	0.32476	0.87225	0.75818	-0.39938	0.76989	0.91005	1.152	0.2042	0.86063	0.99034	1.1539	0.20647	0.49402	0.83954	0.84578	-0.24165	0.4737	0.94807	1.5711	0.65178	0.62817	0.86402	0.87916	-0.1858	0.76462	0.89834	1.4141	0.49993	0.096318	0.83006	0.52502	-0.92954
Pipecolate_pos	0.4171	0.81239	0.88669	-0.17349	0.0062692	0.25533	0.69338	-0.52828	0.65678	0.90741	1.0575	0.080663	0.31528	0.65306	1.1639	0.21899	0.42263	0.88133	0.9011	-0.15025	0.36466	0.72639	0.86013	-0.21737	0.54532	0.99034	1.1402	0.18934	0.084524	0.51377	1.1529	0.20526	0.25758	0.94807	1.2363	0.30604	0.13644	0.59525	1.1526	0.20492	0.031478	0.51885	1.4479	0.53396	0.67838	0.96871	1.0907	0.1252
Hexanoylglycine_pos	0.41727	0.81239	0.67569	-0.56556	0.21628	0.49183	0.73932	-0.43573	0.38234	0.87727	0.64477	-0.63313	0.085689	0.35215	0.62175	-0.68558	0.53751	0.88885	0.70994	-0.49423	0.019426	0.39242	0.31033	-1.6881	0.87366	0.99034	0.92819	-0.10752	0.91686	0.96667	0.97351	-0.038738	0.28371	0.94807	1.3227	0.40347	0.16804	0.60906	1.3401	0.42233	0.098231	0.57261	1.8686	0.90192	0.59841	0.95745	1.4639	0.5498
L-Carnitine_pos	0.41985	0.81239	0.96763	-0.047472	0.66539	0.82347	1.0361	0.05122	0.3108	0.86557	0.89909	-0.15346	0.023362	0.26458	1.4411	0.5272	0.14303	0.85654	1.2378	0.3078	0.045074	0.44435	1.3474	0.43014	0.73613	0.99034	1.0235	0.033495	0.014746	0.24678	1.3754	0.45986	0.062646	0.94807	1.422	0.50791	0.00091016	0.20311	1.5853	0.66479	0.0046221	0.5013	1.5567	0.63852	0.072087	0.75509	1.5814	0.66123
Tryptophanol_pos	0.41994	0.81239	1.0711	0.099104	0.46012	0.70837	0.8442	-0.24434	0.83268	0.92336	1.0262	0.037264	0.81626	0.94321	0.9631	-0.054237	0.36581	0.87552	0.81531	-0.29459	0.87508	0.9561	1.0213	0.030461	0.20252	0.99034	0.86392	-0.21104	0.24934	0.74026	1.1066	0.14611	0.58553	0.94807	0.95057	-0.073139	0.35582	0.71779	1.1232	0.16756	0.67547	0.85167	0.96749	-0.047676	0.36705	0.90025	1.1483	0.19948
UDP-N-Acetylamino Sugars_Neg	0.42008	0.81239	0.93695	-0.093954	0.95165	0.98738	1.0846	0.11722	0.31934	0.86557	1.1251	0.17007	0.024236	0.26458	1.5601	0.64167	0.43104	0.88133	0.93637	-0.094852	0.06999	0.49851	1.3382	0.42034	0.50899	0.99034	0.88967	-0.16865	0.66801	0.86904	0.94302	-0.084635	0.96065	0.9961	0.99176	-0.011934	0.85046	0.93864	1.0256	0.03646	0.59817	0.83171	0.90858	-0.13832	0.85581	0.99333	0.97193	-0.041071
Kynurenine_pos	0.4207	0.81239	0.94999	-0.074009	0.81245	0.89709	1.023	0.032762	0.53621	0.88108	0.94511	-0.081439	0.15857	0.47046	1.3186	0.39896	0.22561	0.85654	1.2528	0.32511	0.12094	0.55015	1.3404	0.42266	0.48063	0.99034	1.1671	0.22293	0.36477	0.80051	1.042	0.059345	0.20777	0.94807	1.2128	0.27836	0.23274	0.65778	1.2454	0.31666	0.012632	0.5013	1.5963	0.67473	0.10072	0.83006	1.154	0.20662
Sarcosine_pos	0.42391	0.81507	1.2441	0.31511	0.75804	0.89135	1.0612	0.085682	0.63545	0.90741	0.92266	-0.11612	0.11907	0.40412	1.382	0.46679	0.48508	0.88133	0.88674	-0.17341	0.071263	0.49851	1.7084	0.77261	0.029101	0.99034	1.5022	0.58705	0.31283	0.76583	0.93076	-0.10352	0.84011	0.98662	0.98446	-0.022593	0.10129	0.5467	0.88522	-0.17589	0.13546	0.6104	1.3331	0.41481	0.11408	0.83784	0.82133	-0.28397
1-Methylhistidine_pos	0.43071	0.81797	1.047	0.066267	0.35348	0.61142	0.87493	-0.19275	0.86975	0.94473	1.0361	0.051111	0.38476	0.7335	1.2434	0.31433	0.44571	0.88133	0.92288	-0.11578	0.56956	0.84771	0.91264	-0.13189	0.19702	0.99034	0.85485	-0.22626	0.53066	0.83956	0.96276	-0.054755	0.74246	0.9787	1.0581	0.081452	0.2513	0.65796	1.2794	0.35543	0.38631	0.77771	1.0893	0.12345	0.73853	0.96871	0.97341	-0.038877
dUMP_pos	0.43073	0.81797	0.88299	-0.17953	0.76343	0.89362	1.1204	0.16404	0.44855	0.87727	1.1129	0.15433	0.008868	0.26458	1.726	0.78742	0.60902	0.89164	0.92943	-0.10559	0.029048	0.40824	1.5338	0.61706	0.60003	0.99034	1.0687	0.09581	0.32883	0.77152	1.0961	0.13235	0.25021	0.94807	1.3349	0.41668	0.0041502	0.27418	1.3632	0.44703	0.22965	0.67645	1.3254	0.4064	0.41206	0.92217	1.2367	0.30655
Cortisone_pos	0.43339	0.81797	0.88774	-0.17179	0.51285	0.73405	0.92026	-0.11989	0.10587	0.75452	0.76429	-0.38781	0.2058	0.53604	0.6961	-0.52264	0.11053	0.85654	0.77516	-0.36743	0.32848	0.7041	1.1075	0.14728	0.45163	0.99034	0.95266	-0.06997	0.25611	0.74026	1.1647	0.21997	0.58266	0.94807	0.92534	-0.11194	0.074178	0.537	1.3066	0.38582	0.16006	0.63317	1.368	0.45203	0.037621	0.75509	1.1304	0.17682
ADP_Neg	0.43393	0.81797	1.2643	0.33837	0.47986	0.7214	1.3505	0.43355	0.45492	0.87727	1.1905	0.25159	0.46733	0.7606	0.94835	-0.076502	0.6475	0.90178	0.90844	-0.13854	0.53143	0.82529	0.7792	-0.35994	0.71232	0.99034	0.92036	-0.11973	0.06023	0.47339	0.48096	-1.056	0.63625	0.94807	0.72831	-0.45737	0.13364	0.59525	0.42634	-1.2299	0.37386	0.77728	0.65851	-0.60272	0.10672	0.832	0.30614	-1.7077
5-Hydroxyl-Indole-3-Acetic Acid_Neg	0.43455	0.81797	0.65194	-0.61719	0.029573	0.28773	2.9664	1.5687	0.31744	0.86557	0.60124	-0.73398	0.0001387	0.062136	2.249	1.1693	0.29422	0.87225	0.57184	-0.80631	0.17358	0.60711	2.665	1.4141	0.26427	0.99034	0.63403	-0.65738	0.60023	0.86465	0.94442	-0.082494	0.51371	0.94807	0.75998	-0.39596	0.026445	0.42312	0.52336	-0.93414	0.88406	0.94766	1.2089	0.27367	0.54423	0.93599	1.0776	0.10778
Acetylserine_pos	0.43826	0.81881	0.93532	-0.096472	0.15035	0.4536	0.86188	-0.21445	0.37334	0.87727	0.91125	-0.13408	0.43089	0.74923	1.0957	0.13184	0.40145	0.88133	1.1227	0.16703	0.98611	0.99881	1.0297	0.042294	0.81385	0.99034	0.96007	-0.058795	0.27923	0.74026	1.0783	0.10875	0.37228	0.94807	1.1764	0.23439	0.052643	0.537	1.2594	0.33278	0.14233	0.61296	1.251	0.32309	0.25932	0.86825	1.2453	0.31651
cAMP_pos	0.43892	0.81881	1.0688	0.096006	0.43925	0.69047	0.90332	-0.14669	0.4869	0.87727	0.9205	-0.11952	0.90158	0.95712	1.0229	0.03266	0.69989	0.91148	0.95394	-0.068034	0.51669	0.81795	1.1154	0.15752	0.4705	0.99034	1.0944	0.13015	0.00097685	0.10941	0.72816	-0.45766	0.19075	0.94807	1.0863	0.11938	0.077226	0.537	0.85031	-0.23395	0.3122	0.71201	1.1005	0.13816	0.26527	0.86825	0.91912	-0.12168
L-Dihydroorotic Acid_Neg	0.44047	0.81881	0.70818	-0.49782	0.11047	0.40832	1.7602	0.81571	0.96595	0.97819	0.90882	-0.13794	0.022136	0.26458	2.2245	1.1535	0.36115	0.87342	1.3981	0.48345	0.06702	0.49851	2.3754	1.2481	0.86415	0.99034	0.81441	-0.29618	0.76301	0.91013	1.2265	0.29453	0.27248	0.94807	1.455	0.54099	0.078453	0.537	1.7352	0.79506	0.27588	0.69465	1.557	0.63879	0.19931	0.86825	2.6457	1.4037
1,7-Dimethylxanthine_pos	0.44643	0.81909	1.0322	0.04579	0.22717	0.49912	0.93711	-0.093707	0.5237	0.87906	0.9767	-0.034012	0.57671	0.82499	0.95745	-0.062731	0.66135	0.90705	0.98494	-0.021888	0.72851	0.89172	0.97692	-0.033694	0.44599	0.99034	0.96864	-0.045973	0.61211	0.86572	1.0159	0.022791	0.34097	0.94807	1.0505	0.071119	0.79459	0.9151	1.0241	0.034419	0.17485	0.65108	1.1365	0.18454	0.66736	0.96871	1.0602	0.084377
Threonic Acid_Neg	0.44676	0.81909	0.91002	-0.13602	0.056128	0.31792	1.4057	0.49126	0.68858	0.90741	1.1016	0.13964	0.024349	0.26458	1.5609	0.64238	0.43337	0.88133	1.1567	0.21007	0.046955	0.44435	1.491	0.57624	0.45427	0.99034	1.1836	0.24322	0.61084	0.86572	0.93865	-0.091348	0.55626	0.94807	1.0761	0.10581	0.12749	0.59525	1.2123	0.27777	0.17855	0.65182	1.2626	0.33639	0.35325	0.89633	1.1138	0.15547
L-Phenylalanine_pos	0.44785	0.81909	0.9511	-0.072324	0.73716	0.88359	1.0277	0.039398	0.04845	0.75452	0.82209	-0.28264	0.71048	0.87779	1.0354	0.050135	0.21688	0.85654	0.84241	-0.24741	0.56575	0.84768	1.0774	0.10749	0.87782	0.99034	0.98338	-0.024182	0.0015249	0.11386	1.1486	0.19982	0.23764	0.94807	0.88756	-0.17208	0.2368	0.65796	1.0759	0.10556	0.63919	0.83832	0.95243	-0.070319	0.10133	0.83006	1.1152	0.1573
Glycine_Neg	0.44983	0.81909	0.89201	-0.16487	0.20772	0.48246	1.4315	0.51752	0.016611	0.74418	0.69427	-0.52642	0.042732	0.26589	1.3954	0.48072	0.10291	0.85654	0.76184	-0.39245	0.3772	0.73472	1.1598	0.21385	0.37882	0.99034	0.80822	-0.30718	0.9761	0.99016	1.0222	0.031724	0.25911	0.94807	0.76333	-0.38961	0.84659	0.93864	0.96441	-0.052287	0.45503	0.77931	0.83507	-0.26004	0.67591	0.96871	1.1269	0.17233
Malonyl-CoA_Neg	0.45048	0.81909	1.1454	0.1959	0.69959	0.854	1.1539	0.20654	0.41837	0.87727	0.77783	-0.36248	0.2794	0.63218	1.249	0.32076	0.27414	0.85912	1.2933	0.37106	0.29207	0.69687	1.2452	0.3164	0.98592	0.99034	1.0006	0.00086215	0.38708	0.80051	0.92929	-0.1058	0.15176	0.94807	0.87646	-0.19024	0.20425	0.63108	0.76181	-0.3925	0.8707	0.94544	0.99102	-0.013015	0.24513	0.86825	0.77565	-0.36652
Daidzein_pos	0.45369	0.81909	1.0739	0.1028	0.10034	0.39471	0.86228	-0.21378	0.30076	0.86557	0.89022	-0.16777	0.58474	0.82499	0.94027	-0.088854	0.98296	0.99185	1.0015	0.0021321	0.93686	0.98056	1.0051	0.007307	0.84899	0.99034	0.98594	-0.020434	0.71309	0.88666	1.0368	0.05215	0.34206	0.94807	1.1539	0.20649	0.59753	0.8543	1.0474	0.066823	0.067618	0.51885	1.1885	0.24919	0.81791	0.99333	0.97877	-0.030954
Lipoic Acid_pos	0.45693	0.81909	0.92883	-0.10651	0.86798	0.92806	1.0102	0.014576	0.17073	0.77686	0.88615	-0.17437	0.92389	0.96332	1.0238	0.033903	0.31201	0.87225	0.91239	-0.13228	0.7832	0.92093	1.0259	0.036895	0.88916	0.99034	0.97758	-0.032714	0.58875	0.85915	0.96648	-0.049193	0.96249	0.9961	0.99955	-0.00064757	0.4331	0.76094	1.0624	0.087285	0.23114	0.67645	1.1925	0.25403	0.47526	0.92473	0.95239	-0.070379
Valine_pos	0.46156	0.81909	0.95901	-0.06039	0.90023	0.95364	1.0023	0.0033148	0.66903	0.90741	0.96175	-0.05626	0.65366	0.84665	1.0436	0.061585	0.020571	0.85654	0.79113	-0.33801	0.94558	0.98288	1.0333	0.047206	0.16297	0.99034	1.0974	0.13414	0.40131	0.80621	0.95982	-0.05916	0.8279	0.97971	1.0301	0.042773	0.4666	0.76516	1.0435	0.061472	0.84065	0.93475	1.0125	0.017963	0.68053	0.96871	1.051	0.071738
Oh-Phenylpyruvate_Neg	0.46424	0.81909	0.50707	-0.97975	0.022554	0.28773	0.28702	-1.8008	0.4855	0.87727	0.58629	-0.7703	0.14244	0.44536	2.5007	1.3224	0.77226	0.94371	0.83232	-0.26478	0.35122	0.72251	1.8813	0.91173	0.85649	0.99034	1.0457	0.064442	0.49066	0.83954	1.4715	0.55724	0.81793	0.97971	1.2791	0.35512	0.73326	0.8996	1.1026	0.14092	0.077871	0.5223	2.5804	1.3676	0.6035	0.96216	0.89853	-0.15436
Pyruvate_Neg	0.46708	0.81909	1.1147	0.15661	0.028891	0.28773	1.4845	0.56994	0.31403	0.86557	1.1713	0.22808	0.19146	0.51361	1.4531	0.53915	0.17348	0.85654	1.1145	0.15634	0.035212	0.43819	1.4366	0.52268	0.36929	0.99034	1.1423	0.19197	0.57698	0.85305	0.92187	-0.11737	0.93938	0.9961	0.98452	-0.022514	0.066093	0.537	1.2886	0.36579	0.46127	0.78399	1.1964	0.25871	0.024656	0.75509	1.3936	0.47884
Betaine_pos_2	0.46779	0.81909	1.12	0.1635	0.14578	0.4536	0.86821	-0.20388	0.27877	0.85145	0.89245	-0.16416	0.58013	0.82499	1.0595	0.083343	0.20821	0.85654	1.1555	0.20853	0.093133	0.52791	1.165	0.22035	0.29718	0.99034	0.82169	-0.28334	0.0075313	0.2108	1.2211	0.28821	0.63082	0.94807	0.91055	-0.1352	0.15917	0.60344	1.2434	0.31432	0.97088	0.99325	1.0096	0.01381	0.27745	0.86825	1.2061	0.2704
O-Acetylserine_Neg	0.46802	0.81909	1.1891	0.24986	0.03097	0.28773	1.3188	0.39921	0.73492	0.90741	0.9572	-0.063107	0.074055	0.34203	1.306	0.38515	0.68839	0.90705	1.1286	0.17459	0.098413	0.52791	1.2096	0.27449	0.82038	0.99034	1.0268	0.03821	0.81992	0.92525	1.0441	0.062317	0.62355	0.94807	0.84684	-0.23984	0.68893	0.88946	1.0437	0.061725	0.84064	0.93475	1.0236	0.03359	0.66478	0.96871	1.0717	0.099841
Acetylputrescine_pos	0.46852	0.81909	1.0422	0.059669	0.23632	0.50301	0.91773	-0.12387	0.19443	0.77686	1.0824	0.11425	0.89309	0.95474	0.98894	-0.016046	0.49633	0.88133	1.0623	0.087128	0.47638	0.80033	0.93388	-0.098688	0.79948	0.99034	0.98123	-0.027344	0.83754	0.93345	1.0226	0.032214	0.15291	0.94807	1.1966	0.25889	0.81601	0.92918	0.98755	-0.018074	0.036973	0.51885	1.187	0.24732	0.64884	0.96871	0.96031	-0.058435
Glyceraldehyde 3-Phosphate_Neg	0.46935	0.81909	0.92353	-0.11477	0.031271	0.28773	1.2166	0.28286	0.23289	0.83103	0.7661	-0.38439	0.77027	0.91706	1.0336	0.047667	0.17288	0.85654	0.88831	-0.17087	0.85203	0.95065	1.0298	0.042369	0.18103	0.99034	0.87971	-0.1849	0.16892	0.70208	0.68685	-0.54192	0.70576	0.97287	0.96575	-0.050279	0.6409	0.87014	0.94443	-0.082491	0.20823	0.67645	0.89764	-0.15579	0.34114	0.89633	0.82002	-0.28627
CDP_Neg	0.47087	0.81909	0.95603	-0.06487	0.22026	0.49736	1.1123	0.1535	0.12631	0.75452	1.0769	0.10692	0.15845	0.47046	1.0977	0.13454	0.98036	0.99185	1.0138	0.019815	0.026826	0.40824	1.1889	0.24957	0.34425	0.99034	0.93408	-0.098389	0.66173	0.86904	0.95066	-0.072998	0.19637	0.94807	0.88534	-0.17569	0.32292	0.6913	0.86851	-0.20339	0.27786	0.69465	0.88185	-0.1814	0.27259	0.86825	0.87515	-0.19239
Methyl Oxo Pentanoate_pos	0.47389	0.81909	0.87165	-0.19818	0.11536	0.40832	0.59868	-0.74015	0.75061	0.90741	0.97637	-0.034499	0.64584	0.84355	0.95308	-0.069329	0.31192	0.87225	0.76506	-0.38636	0.345	0.71887	0.86505	-0.20914	0.15115	0.99034	1.5627	0.64406	0.6093	0.86572	1.0361	0.051233	0.54858	0.94807	1.2186	0.28523	0.5901	0.8543	0.93429	-0.098052	0.16706	0.64476	1.4295	0.51548	0.57484	0.94332	1.0727	0.1013
Choline_pos	0.47461	0.81909	1.0587	0.082302	0.26198	0.53108	0.90263	-0.14779	0.41375	0.87727	0.91401	-0.12972	0.16046	0.47295	1.1304	0.17681	0.58371	0.88885	1.0817	0.11334	0.12643	0.55531	1.1806	0.23949	0.90805	0.99034	0.97358	-0.038635	0.23861	0.74026	1.1076	0.14738	0.64462	0.94807	0.92942	-0.1056	0.015322	0.31201	1.3444	0.42701	0.2146	0.67645	1.2112	0.2764	0.16592	0.86825	1.3242	0.40516
Flavin Mononucleotide_pos	0.47514	0.81909	1.0453	0.063939	0.23521	0.50301	0.89027	-0.16769	0.69313	0.90741	0.97581	-0.035331	0.87129	0.94742	1.0217	0.030996	0.54162	0.88885	1.0531	0.074609	0.71788	0.88598	0.96191	-0.056022	0.63832	0.99034	0.96446	-0.052208	0.0059556	0.19058	1.114	0.15581	0.49015	0.94807	1.0886	0.12244	0.090183	0.537	1.1342	0.18168	0.39433	0.77771	1.0808	0.11212	0.30872	0.89231	1.1391	0.18794
Ornithine_pos	0.47583	0.81909	1.1089	0.14911	0.83187	0.90897	0.96778	-0.047244	0.37665	0.87727	0.87488	-0.19285	0.12268	0.40566	1.7594	0.81506	0.84926	0.96078	1.092	0.12702	0.24808	0.67116	1.4327	0.5187	0.60559	0.99034	1.0653	0.091317	0.1052	0.57564	1.3916	0.47672	0.38871	0.94807	0.85758	-0.22165	0.81833	0.92918	0.95594	-0.065011	0.13501	0.6104	1.4489	0.535	0.90434	0.99333	1.0243	0.034645
Phenylacetylglutamine_pos	0.48103	0.81909	0.65764	-0.60463	0.79936	0.8951	0.83369	-0.26241	0.44214	0.87727	1.1301	0.17645	0.27678	0.63139	0.59683	-0.74461	0.39338	0.87679	1.2063	0.27054	0.97323	0.99545	0.93805	-0.092268	0.97481	0.99034	0.98511	-0.021641	0.11016	0.58039	1.7177	0.78047	0.35485	0.94807	1.2811	0.35743	0.49076	0.77688	1.3458	0.42841	0.1958	0.67645	1.5839	0.6635	0.55113	0.93599	1.2243	0.29193
Phosphocholine_pos	0.48106	0.81909	1.1548	0.20768	0.96102	0.99202	1.0076	0.01093	0.073291	0.75452	1.3111	0.39077	0.0049346	0.26458	1.8175	0.86193	0.44965	0.88133	1.3154	0.39545	0.67197	0.87463	1.0511	0.071947	0.39413	0.99034	0.87833	-0.18717	0.90111	0.96119	1.0264	0.037621	0.46529	0.94807	1.0896	0.12378	0.10258	0.54711	1.3758	0.46029	0.70707	0.86496	0.95186	-0.071185	0.99457	0.99919	1.0714	0.099531
Erythronic Acid_Neg	0.48603	0.81909	0.83499	-0.26017	0.10931	0.40807	1.6286	0.70362	0.47554	0.87727	1.1572	0.21069	0.021851	0.26458	2.3816	1.2519	0.16134	0.85654	1.4128	0.49851	0.08573	0.52791	1.7585	0.81432	0.52867	0.99034	0.81746	-0.29079	0.64884	0.86804	1.2592	0.33252	0.61582	0.94807	1.0637	0.089118	0.032391	0.43973	1.5428	0.62551	0.42901	0.77771	1.1767	0.23475	0.1692	0.86825	1.3596	0.44323
2-Hydroxyisocaproic Acid_Neg	0.48787	0.81909	0.73154	-0.45099	0.065392	0.31792	1.421	0.50689	0.85579	0.93969	0.88194	-0.18125	0.10282	0.37144	1.293	0.37069	0.27494	0.85912	1.3051	0.38421	0.014656	0.36477	1.8506	0.888	0.52102	0.99034	1.1536	0.20617	0.39132	0.80051	0.89329	-0.1628	0.64756	0.94807	0.89431	-0.16115	0.46613	0.76516	0.93437	-0.097929	0.43187	0.77771	1.1484	0.19959	0.36805	0.90025	0.9201	-0.12013
Leucic Acid_Neg	0.4886	0.81909	0.89862	-0.15421	0.3788	0.63318	1.3356	0.41744	0.63399	0.90741	0.93257	-0.10072	0.03296	0.26458	1.7653	0.81988	0.54834	0.88885	0.90331	-0.14671	0.097634	0.52791	1.5497	0.63203	0.4552	0.99034	0.83427	-0.26141	0.9769	0.99016	0.93646	-0.094715	0.073628	0.94807	0.65339	-0.61399	0.48568	0.77688	0.69601	-0.52282	0.060713	0.51885	0.6361	-0.65267	0.91806	0.99333	0.94658	-0.079196
CMP_pos	0.48893	0.81909	0.92145	-0.11803	0.64223	0.80863	1.0699	0.09752	0.66155	0.90741	0.94393	-0.08325	0.8972	0.95474	1.0598	0.083804	0.54173	0.88885	0.9096	-0.13669	0.57839	0.84771	1.1333	0.18056	0.18171	0.99034	1.2808	0.35701	0.14811	0.65694	0.79781	-0.32589	0.26175	0.94807	1.2434	0.31428	0.5388	0.81002	0.94715	-0.078337	0.070834	0.51885	1.2812	0.35754	0.016712	0.7487	0.73244	-0.44921
Methylthioadenosine_pos	0.49087	0.81909	0.92818	-0.10752	0.19854	0.4808	0.83305	-0.26352	0.72096	0.90741	0.95854	-0.061094	0.093432	0.36562	1.2805	0.35672	0.62843	0.89377	1.0844	0.11688	0.68526	0.87463	1.085	0.11763	0.048731	0.99034	0.78014	-0.35819	0.089969	0.52346	1.1893	0.25013	0.27486	0.94807	1.2833	0.35986	0.0087243	0.27418	1.5818	0.66152	0.027059	0.51885	1.4178	0.50365	0.30436	0.89021	1.5634	0.64471
Creatine_pos	0.49261	0.81909	1.0611	0.085498	0.29163	0.5536	1.1292	0.17525	0.24883	0.83103	0.85406	-0.22758	0.038742	0.26458	1.3142	0.39424	0.96704	0.98818	1.0212	0.030265	0.53238	0.82529	1.2491	0.32087	0.023488	0.99034	1.4733	0.55903	0.17995	0.70208	1.1561	0.20924	0.251	0.94807	1.1722	0.22921	0.0013601	0.20311	1.5077	0.59232	0.016177	0.5013	1.6861	0.7537	0.4587	0.92473	1.3437	0.42617
Betaine_pos_1	0.49404	0.81909	1.1869	0.24723	0.18757	0.47198	0.89388	-0.16185	0.3496	0.87727	0.86601	-0.20754	0.50592	0.78426	1.0603	0.084484	0.19916	0.85654	1.2072	0.27165	0.026707	0.40824	1.2352	0.30476	0.34957	0.99034	0.76349	-0.38933	0.0090479	0.2108	1.2175	0.28397	0.60071	0.94807	0.84935	-0.23556	0.14708	0.59525	1.3184	0.39875	0.93224	0.9782	1.0228	0.032581	0.28558	0.86864	1.2561	0.32894
Phenylpropiolic Acid_Neg	0.49421	0.81909	1.1119	0.15303	0.063297	0.31792	1.3608	0.44442	0.67196	0.90741	0.9306	-0.10377	0.5126	0.78718	1.1571	0.21046	0.90484	0.97182	1.0314	0.044629	0.23592	0.65647	1.102	0.14014	0.92144	0.99034	0.9923	-0.011147	0.2072	0.70222	1.3031	0.38194	0.5981	0.94807	0.92579	-0.11125	0.43328	0.76094	1.0683	0.095273	0.39988	0.77771	1.2019	0.26537	0.71173	0.96871	1.0496	0.069812
Malondialdehyde_Neg	0.49548	0.81909	1.2693	0.34406	0.63886	0.80863	0.87484	-0.1929	0.27218	0.85145	1.5678	0.6487	0.59444	0.83221	1.1895	0.25036	0.93131	0.97854	0.95419	-0.067656	0.96187	0.99328	1.0186	0.026518	0.89725	0.99034	1.0028	0.0040717	0.77465	0.91569	0.78772	-0.34424	0.34357	0.94807	1.4001	0.48556	0.3158	0.68679	0.58897	-0.76374	0.054669	0.51885	1.9372	0.95396	0.15014	0.86825	0.42586	-1.2316
3-Hydroxykynurenine_pos	0.4986	0.82122	1.0279	0.039631	0.43009	0.68303	0.95206	-0.070877	0.079459	0.75452	0.92789	-0.10797	0.43037	0.74923	0.92527	-0.11205	0.34808	0.87225	0.95674	-0.063807	0.66121	0.87115	0.96944	-0.044772	0.339	0.99034	0.94772	-0.077469	0.14403	0.64524	1.0691	0.096357	0.59598	0.94807	1.0544	0.076487	0.25254	0.65796	1.071	0.0989	0.32614	0.73466	1.0902	0.12461	0.90542	0.99333	1.022	0.031417
Oxalacetate_Neg	0.50851	0.82982	0.89758	-0.15588	0.20297	0.48122	1.3328	0.41441	0.96416	0.97819	1.0038	0.0054777	0.062925	0.3356	1.7061	0.77074	0.66229	0.90705	0.94971	-0.074443	0.12099	0.55015	1.5407	0.62362	0.96227	0.99034	1.0422	0.059685	0.92828	0.96939	1.1111	0.15193	0.24783	0.94807	0.67657	-0.56369	0.3707	0.72785	1.2531	0.32554	0.54038	0.81495	0.80647	-0.31031	0.48455	0.92756	1.1648	0.22007
4-Hydroxphenylpyruvic Acid_Neg	0.50928	0.82982	0.80123	-0.31972	0.67028	0.82724	1.3291	0.41046	0.69392	0.90741	0.86016	-0.21732	0.9316	0.96332	0.96364	-0.053434	0.16599	0.85654	0.5754	-0.79737	0.97292	0.99545	1.0192	0.027447	0.3129	0.99034	1.3778	0.46235	0.25571	0.74026	0.74623	-0.42231	0.91915	0.9961	0.90021	-0.15167	0.54336	0.81142	0.89837	-0.15463	0.42635	0.77771	1.1543	0.20704	0.88717	0.99333	0.97359	-0.038621
Methylnicotinamide_pos	0.51021	0.82982	0.9684	-0.046332	0.76795	0.89362	0.98183	-0.026456	0.95088	0.97546	1.0014	0.0019885	0.21611	0.54769	0.91892	-0.12198	0.10543	0.85654	0.8914	-0.16586	0.88966	0.9561	0.99218	-0.011331	0.23061	0.99034	0.90666	-0.14136	0.175	0.70208	1.1904	0.2514	0.26995	0.94807	1.1096	0.15004	0.013116	0.30546	1.2113	0.27661	0.1012	0.57261	1.1341	0.18149	0.12883	0.8572	1.1605	0.2147
Glutamate_pos	0.51123	0.82982	1.1265	0.17187	0.8012	0.8951	1.0126	0.018124	0.16253	0.77686	0.81285	-0.29893	0.17999	0.49663	1.2966	0.37473	0.61385	0.89288	0.93769	-0.09281	0.22178	0.64131	1.3044	0.38344	0.85647	0.99034	1.0227	0.032354	0.61832	0.86572	0.97923	-0.030282	0.54763	0.94807	1.0688	0.095992	0.88463	0.95799	1.0307	0.043622	0.40621	0.77771	1.1674	0.22326	0.9554	0.99919	1.0235	0.033522
Spermidine_pos	0.51525	0.83189	0.86292	-0.2127	0.47593	0.7214	0.86733	-0.20535	0.40286	0.87727	0.81665	-0.2922	0.042435	0.26589	0.46353	-1.1093	0.11167	0.85654	0.5622	-0.83084	0.16874	0.60711	0.69462	-0.5257	0.3909	0.99034	1.1777	0.23595	0.20559	0.70222	0.69047	-0.53434	0.68644	0.97058	0.93658	-0.094533	0.25344	0.65796	0.71745	-0.47906	0.43322	0.77771	0.8396	-0.25223	0.048039	0.75509	0.52731	-0.92327
Dihydrothymine_pos	0.51622	0.83189	0.87196	-0.19767	0.68372	0.8415	1.0263	0.037445	0.60852	0.90341	0.8938	-0.16197	0.0010632	0.15877	0.67029	-0.57714	0.17439	0.85654	0.74641	-0.42195	0.13542	0.55659	0.81783	-0.29013	0.6742	0.99034	1.0383	0.054244	0.72768	0.88828	0.94666	-0.079083	0.81047	0.97971	0.97577	-0.03538	0.45774	0.76516	0.88208	-0.18102	0.98081	0.99636	1.0032	0.0045769	0.78681	0.97923	0.95038	-0.073429
Amino Sugars_pos	0.52083	0.83632	1.1179	0.16074	0.00085928	0.10604	0.3281	-1.6078	0.65658	0.90741	1.0582	0.081548	0.90765	0.9576	1.0094	0.013501	0.69954	0.91148	0.84229	-0.24762	0.36836	0.7302	0.81082	-0.30255	0.38533	0.99034	0.7016	-0.51128	0.4269	0.82792	0.86837	-0.20362	0.45329	0.94807	1.1651	0.22044	0.44944	0.76516	0.87078	-0.19962	0.95858	0.98921	0.9645	-0.052146	0.10771	0.832	0.59558	-0.74763
Malate_Neg	0.52312	0.83699	1.1513	0.20326	0.30564	0.56816	1.2446	0.31566	0.61368	0.90341	0.9132	-0.131	0.28287	0.63682	1.2734	0.34865	0.8358	0.95935	1.0044	0.0063805	0.098922	0.52791	1.4998	0.5848	0.49378	0.99034	1.1881	0.24861	0.43324	0.82945	0.87823	-0.18733	0.64308	0.94807	0.84487	-0.2432	0.1971	0.63081	0.81478	-0.29551	0.34233	0.73924	1.3723	0.45662	0.2688	0.86825	0.77331	-0.37088
Deoxyadenosine_pos_2	0.52667	0.83967	1.0338	0.047981	0.23984	0.50683	0.8888	-0.17007	0.11318	0.75452	0.89799	-0.15522	0.42328	0.74923	0.9112	-0.13416	0.48342	0.88133	0.94393	-0.083244	0.85661	0.95226	0.97926	-0.030242	0.47304	0.99034	0.94348	-0.083932	0.30512	0.7594	1.0344	0.048755	0.59788	0.94807	1.0693	0.096602	0.81067	0.92884	1.0182	0.026082	0.25931	0.69153	1.098	0.1349	0.95802	0.99919	1.0075	0.010793
N-Acetylphenylalanine_Neg	0.53125	0.84351	1.1664	0.22207	0.79711	0.8951	1.072	0.10036	0.75795	0.90741	0.94502	-0.08158	0.31778	0.65306	1.1772	0.23541	0.097444	0.85654	0.69373	-0.52755	0.0018245	0.36477	1.5875	0.66677	0.71037	0.99034	1.1331	0.18022	0.081527	0.51377	1.3518	0.43488	0.16996	0.94807	0.71401	-0.48599	0.41228	0.7544	1.1734	0.23069	0.21703	0.67645	0.73769	-0.43891	0.07819	0.76644	1.4436	0.5297
Agmatine_pos	0.53736	0.84351	1.234	0.30339	0.51619	0.73648	0.73513	-0.44394	0.75391	0.90741	0.93942	-0.090157	0.76176	0.91493	1.0364	0.051613	0.30948	0.87225	1.2473	0.31884	0.82126	0.93835	1.0145	0.020729	0.83372	0.99034	1.0574	0.080589	0.3078	0.76185	0.78197	-0.35481	0.62347	0.94807	1.1296	0.17587	0.9705	0.98769	1.0155	0.022121	0.2824	0.69465	1.2065	0.27087	0.27908	0.86825	0.74039	-0.43364
Hydroxyphenylpyruvates_Neg	0.53929	0.84351	1.149	0.20042	0.010117	0.26871	1.2236	0.29113	0.68791	0.90741	1.2208	0.28779	0.84139	0.94742	1.0835	0.11568	0.35713	0.87342	0.85216	-0.2308	0.088261	0.52791	1.6821	0.75026	0.75568	0.99034	1.0715	0.099598	0.044266	0.4333	1.3957	0.48094	0.12855	0.94807	0.67822	-0.56018	0.57256	0.84559	0.95899	-0.060411	0.56153	0.82388	0.86087	-0.21613	0.75288	0.96871	1.1059	0.14519
Fumarate_Neg	0.54053	0.84351	1.187	0.24733	0.63926	0.80863	0.95096	-0.072539	0.24253	0.83103	0.7995	-0.32284	0.76448	0.91574	1.0219	0.031212	0.43729	0.88133	0.87974	-0.18485	0.47602	0.80033	1.233	0.30221	0.17776	0.99034	1.3131	0.393	0.26588	0.74026	0.88567	-0.17517	0.349	0.94807	0.76236	-0.39146	0.048624	0.537	0.7891	-0.34172	0.64728	0.83981	0.96408	-0.052773	0.18655	0.86825	0.75829	-0.39918
Hypoxanthine_pos	0.54298	0.84351	1.0511	0.071879	0.79018	0.8951	1.0153	0.021906	0.46929	0.87727	1.059	0.082767	0.5184	0.78994	0.91645	-0.12587	0.67093	0.90705	0.96697	-0.048455	0.61933	0.8614	0.94793	-0.077141	0.85566	0.99034	1.0176	0.025208	0.46996	0.83954	1.0677	0.094512	0.50555	0.94807	1.0717	0.099948	0.093289	0.537	1.151	0.20285	0.71523	0.86815	0.96756	-0.047575	0.0043512	0.37568	1.1945	0.25637
1-Methyl-Histidine_pos	0.54462	0.84351	0.88848	-0.17058	0.7308	0.8801	1.0301	0.042718	0.41202	0.87727	0.82349	-0.28017	0.66019	0.85235	1.0606	0.084913	0.2439	0.85654	0.77404	-0.36952	0.40785	0.75375	1.139	0.18772	0.45959	0.99034	1.217	0.28329	0.52118	0.83956	0.92786	-0.10803	0.7023	0.97287	1.1844	0.24421	0.25809	0.65796	1.265	0.33909	0.1213	0.58618	1.4619	0.54788	0.10535	0.832	1.2426	0.31339
GMP_pos_2	0.54472	0.84351	1.0369	0.052321	0.31379	0.57378	0.89354	-0.16239	0.30808	0.86557	0.95242	-0.070332	0.22621	0.55814	0.86629	-0.20707	0.57308	0.88885	0.97076	-0.042811	0.86891	0.95594	0.97883	-0.030875	0.76998	0.99034	0.98008	-0.029023	0.50436	0.83956	1.034	0.048245	0.5923	0.94807	1.0752	0.10466	0.59058	0.8543	1.0484	0.068228	0.50756	0.79363	1.105	0.14407	0.88425	0.99333	1.021	0.030045
Adenosine_pos	0.5458	0.84351	0.9689	-0.045584	0.52947	0.74124	0.91041	-0.13541	0.09491	0.75452	0.84133	-0.24926	0.70003	0.87755	0.94046	-0.088561	0.19919	0.85654	0.89502	-0.16001	0.94111	0.98056	0.97668	-0.034043	0.73625	0.99034	1.0199	0.028367	0.34164	0.77856	0.95672	-0.063831	0.99391	0.99657	1.0075	0.010733	0.97582	0.98906	1.007	0.01011	0.50284	0.79363	1.093	0.1283	0.34061	0.89633	1.0631	0.088244
L-Proline_pos	0.54654	0.84351	1.1134	0.15501	0.15144	0.4536	1.2463	0.31769	0.69813	0.90741	0.97574	-0.035425	0.018565	0.26458	1.7105	0.77444	0.32575	0.87225	0.84022	-0.25116	0.14234	0.55908	1.8218	0.86535	0.17398	0.99034	1.2083	0.27298	0.025319	0.32409	1.3829	0.46767	0.63721	0.94807	0.92423	-0.11367	0.66369	0.88176	1.0461	0.065033	0.48831	0.79363	1.1382	0.18679	0.91357	0.99333	1.0651	0.091048
Norepinephrine_pos	0.5479	0.84351	0.95907	-0.060286	0.90042	0.95364	0.9913	-0.012609	0.008255	0.74418	0.80243	-0.31756	0.14315	0.44536	1.4131	0.49886	0.85472	0.96209	1.0309	0.043887	0.27111	0.6918	1.3212	0.40188	0.48799	0.99034	0.91665	-0.12556	0.25805	0.74026	1.132	0.17888	0.19279	0.94807	1.2155	0.28152	0.088216	0.537	1.3252	0.40626	0.083691	0.5269	1.2514	0.32355	0.32139	0.89633	1.3607	0.44435
Acetominophen_pos	0.55505	0.85073	1.0356	0.050485	0.22727	0.49912	0.89353	-0.16241	0.023942	0.75452	0.91364	-0.1303	0.789	0.92532	0.97328	-0.039076	0.89648	0.97182	0.99599	-0.0057963	0.82944	0.93835	0.97781	-0.032368	0.50763	0.99034	0.96	-0.058888	0.64463	0.86804	1.0134	0.01923	0.68677	0.97058	1.0494	0.069517	0.88939	0.95799	0.99579	-0.006093	0.42934	0.77771	1.0853	0.11814	0.96032	0.99919	1.0073	0.010442
Citraconic Acid_Neg	0.55857	0.85073	1.0675	0.094269	0.98166	0.99499	1.0908	0.12536	0.2061	0.79329	0.84515	-0.24271	0.0071285	0.26458	0.46395	-1.108	0.22565	0.85654	0.79488	-0.33119	0.18765	0.61884	0.69784	-0.51904	0.50507	0.99034	1.116	0.15832	0.13296	0.62699	0.63579	-0.65338	0.13315	0.94807	0.69382	-0.52737	0.079484	0.537	0.56549	-0.82242	0.10975	0.57717	0.63318	-0.6593	0.2146	0.86825	0.64647	-0.62934
Tryptophan_pos	0.55939	0.85073	0.97944	-0.029973	0.27094	0.53908	0.9145	-0.12894	0.0070136	0.74418	0.88506	-0.17616	0.77153	0.91706	0.97345	-0.038828	0.10948	0.85654	0.90885	-0.13789	0.8063	0.93557	0.97827	-0.031694	0.38309	0.99034	0.95708	-0.063285	0.21486	0.713	1.0307	0.043656	0.77406	0.9787	1.0343	0.048622	0.38204	0.73456	1.0494	0.069497	0.33364	0.73466	1.0791	0.10977	0.551	0.93599	1.0326	0.046278
Nicotinic Acid_pos	0.56019	0.85073	1.0385	0.054526	0.47108	0.71784	0.94834	-0.07653	0.605	0.90341	0.96679	-0.048727	0.35954	0.70958	0.91643	-0.1259	0.27998	0.85912	0.89765	-0.15577	0.46585	0.79962	0.92648	-0.11017	0.69104	0.99034	0.98457	-0.022435	0.11672	0.58753	1.0749	0.10423	0.42923	0.94807	1.0457	0.064487	0.48745	0.77688	1.0611	0.085524	0.46127	0.78399	1.066	0.09214	0.26771	0.86825	1.0831	0.11511
Cyclic AMP_pos	0.56406	0.85109	1.0534	0.074997	0.34809	0.60443	0.88743	-0.17229	0.50325	0.87727	0.91099	-0.13449	0.56847	0.82397	1.0877	0.12125	0.51346	0.88133	0.91278	-0.13166	0.67824	0.87463	1.0797	0.11066	0.45133	0.99034	1.1075	0.14729	0.00033232	0.07444	0.71546	-0.48306	0.12321	0.94807	1.1451	0.19548	0.056298	0.537	0.86337	-0.21195	0.3061	0.71181	1.0956	0.13169	0.1699	0.86825	0.8911	-0.16634
2,3-Diphospho-D-Glyceric Acid_Neg	0.56477	0.85109	1.1452	0.19562	0.21075	0.48667	1.5711	0.65174	0.95586	0.97546	1.0055	0.0079523	0.014243	0.26458	2.7666	1.4681	0.059724	0.85654	1.3495	0.43238	0.052792	0.47302	1.8989	0.92516	0.87788	0.99034	1.0217	0.030962	0.75564	0.90768	1.2177	0.28416	0.55143	0.94807	1.0904	0.12484	0.1505	0.59525	1.6458	0.71882	0.23834	0.67645	1.2782	0.35411	0.32202	0.89633	1.3694	0.45352
Glycolic Acid_Neg	0.56613	0.85109	0.94763	-0.077606	0.04489	0.31792	1.2186	0.28522	0.95382	0.97546	0.99503	-0.0071862	0.67277	0.85383	0.95978	-0.059219	0.20254	0.85654	0.89804	-0.15514	0.80511	0.93557	1.0286	0.04074	0.8414	0.99034	1.022	0.031377	0.97276	0.99016	1.0107	0.015422	0.77528	0.9787	0.96661	-0.049	0.50559	0.78627	1.0629	0.08797	0.83666	0.93475	0.97541	-0.035924	0.99919	0.99919	1.003	0.0043272
Theophylline_Neg	0.56948	0.85327	1.0784	0.1089	0.06976	0.31792	1.2905	0.3679	0.18468	0.77686	1.101	0.13882	0.096198	0.36562	1.192	0.25334	0.38872	0.87679	1.0671	0.0937	0.30905	0.69687	1.1248	0.16967	0.70124	0.99034	0.97141	-0.041841	0.53674	0.83956	1.074	0.10298	0.54011	0.94807	0.9486	-0.076128	0.47082	0.76516	0.95171	-0.071401	0.44649	0.77931	0.95745	-0.062726	0.88046	0.99333	0.99442	-0.0080717
Geranyl-Pyrophosphate_Neg	0.576	0.85956	0.7757	-0.36642	0.28457	0.54715	0.64207	-0.6392	0.37046	0.87727	0.67256	-0.57226	0.57016	0.82397	0.80452	-0.3138	0.79632	0.94965	1.1726	0.22967	0.57148	0.84771	0.78557	-0.34819	0.45987	0.99034	0.84289	-0.24658	0.0012306	0.11026	0.39843	-1.3276	0.57091	0.94807	1.4614	0.54738	0.13991	0.59525	0.68312	-0.5498	0.60657	0.83171	1.4794	0.56499	0.051036	0.75509	0.61279	-0.70654
Serotonin_pos	0.57751	0.85956	1.0436	0.061585	0.15372	0.45608	1.056	0.078583	0.35406	0.87727	1.0363	0.051507	0.097623	0.36562	1.0719	0.10023	0.55067	0.88885	1.03	0.0427	0.47078	0.80033	1.0303	0.043061	0.14187	0.99034	0.95325	-0.069071	0.70783	0.88666	1.0165	0.023681	0.63744	0.94807	0.97766	-0.032589	0.49823	0.78318	0.96755	-0.047586	0.087114	0.54083	0.94234	-0.085683	0.26318	0.86825	0.97346	-0.03881
Tetradecanedioic Acid_pos	0.58218	0.86004	1.2239	0.29145	0.47829	0.7214	0.77593	-0.36601	0.60637	0.90341	0.83959	-0.25225	0.59938	0.83553	0.85234	-0.2305	0.55536	0.88885	0.829	-0.27055	0.23346	0.65615	0.66813	-0.58179	0.86613	0.99034	1.0333	0.047234	0.66429	0.86904	1.0889	0.12284	0.3659	0.94807	1.3987	0.48414	0.8896	0.95799	1.0384	0.054323	0.45092	0.77931	1.3093	0.38882	0.52635	0.93599	1.1665	0.22223
Deoxyuridine_Neg	0.58263	0.86004	0.94494	-0.0817	0.29386	0.55549	0.77837	-0.36147	0.46619	0.87727	0.91807	-0.12333	0.16822	0.48936	0.70396	-0.50643	0.57064	0.88885	0.9126	-0.13195	0.3278	0.7041	0.79734	-0.32673	0.77481	0.99034	1.0176	0.025128	0.52295	0.83956	0.88203	-0.18111	0.12026	0.94807	0.65574	-0.60881	0.13996	0.59525	0.62793	-0.67133	0.63398	0.83647	0.95056	-0.073152	0.70014	0.96871	0.92401	-0.11402
Imidazoleacetic Acid_pos	0.58465	0.86004	0.91768	-0.12394	0.7911	0.8951	0.92294	-0.11568	0.51834	0.87906	0.91323	-0.13095	0.82551	0.94321	0.95127	-0.072072	0.90137	0.97182	0.9751	-0.036385	0.68454	0.87463	1.0559	0.078451	0.2049	0.99034	1.1259	0.17104	0.49944	0.83954	0.8392	-0.25291	0.13179	0.94807	1.2057	0.26989	0.65437	0.87766	1.0459	0.064745	0.10634	0.5727	1.3414	0.42376	0.84858	0.99333	0.95296	-0.069507
Malonyl-CoA_pos	0.58552	0.86004	0.4415	-1.1795	0.33361	0.59113	0.5919	-0.75658	0.49592	0.87727	0.32681	-1.6135	0.43076	0.74923	0.38763	-1.3672	0.94501	0.97991	0.67257	-0.57225	0.26689	0.68716	0.26765	-1.9016	0.48823	0.99034	0.99289	-0.010294	0.71645	0.88666	0.52242	-0.93672	0.90954	0.9961	0.64246	-0.63833	0.57379	0.84559	0.54085	-0.88671	0.15265	0.62032	2.145	1.101	0.91779	0.99333	0.93457	-0.097618
Argininosuccinic Acid_pos	0.59091	0.86288	0.95906	-0.060314	0.1155	0.40832	1.1891	0.24989	0.66752	0.90741	0.95651	-0.064148	0.031402	0.26458	1.336	0.41796	0.34775	0.87225	0.83967	-0.2521	0.3517	0.72251	1.3307	0.41222	0.020898	0.99034	1.2273	0.2955	0.98711	0.99153	0.96272	-0.054807	0.25817	0.94807	1.134	0.18145	0.69756	0.89543	1.0532	0.074819	0.033136	0.51885	1.4713	0.55713	0.66312	0.96871	1.0864	0.11961
GDP_Neg	0.59265	0.86288	1.0432	0.060985	0.3351	0.59113	1.2634	0.33733	0.69711	0.90741	0.96928	-0.045021	0.35413	0.70202	1.2417	0.31235	0.73058	0.92719	0.9723	-0.040529	0.42634	0.77328	1.181	0.24001	0.45421	0.99034	1.1757	0.23349	0.059284	0.47339	0.82325	-0.28059	0.48628	0.94807	1.1326	0.17969	0.12388	0.59525	0.85249	-0.23024	0.69848	0.86011	1.0392	0.05546	0.022179	0.75509	0.77322	-0.37105
Valerylcarnitine_pos	0.59323	0.86288	0.93489	-0.097132	0.96855	0.9946	1.0085	0.012256	0.65693	0.90741	0.94589	-0.080252	0.4874	0.77267	0.90974	-0.13647	0.21778	0.85654	0.77119	-0.37484	0.25019	0.67116	0.8296	-0.26951	0.53263	0.99034	0.89103	-0.16645	0.074212	0.51377	1.2933	0.37109	0.85119	0.98791	1.0422	0.059598	0.38921	0.73548	0.898	-0.1552	0.44171	0.77931	0.86375	-0.21131	0.37033	0.90025	0.86823	-0.20385
dTTP_Neg	0.6006	0.8691	0.85297	-0.22943	0.58722	0.77375	0.84093	-0.24994	0.70552	0.90741	0.91837	-0.12285	0.052455	0.29145	1.7305	0.79121	0.22359	0.85654	1.3074	0.38674	0.28737	0.69687	1.396	0.48127	0.39538	0.99034	0.6461	-0.63017	0.66778	0.86904	1.1928	0.2543	0.34349	0.94807	1.3292	0.41061	0.43992	0.76094	0.7339	-0.44635	0.50738	0.79363	1.2635	0.33744	0.5553	0.93599	0.7806	-0.35734
Ornithine_Neg	0.60507	0.8691	0.89213	-0.16467	0.27515	0.53908	1.5733	0.65376	0.39318	0.87727	0.81144	-0.30144	0.064411	0.33948	1.8645	0.89881	0.50823	0.88133	0.8541	-0.22753	0.17457	0.60711	1.5275	0.61118	0.62438	0.99034	0.85355	-0.22844	0.7021	0.88666	1.2736	0.34893	0.37893	0.94807	0.69005	-0.53523	0.42983	0.76094	1.2875	0.36453	0.62064	0.83647	0.77805	-0.36207	0.56393	0.93599	1.1385	0.18716
Succinate_Neg	0.61082	0.8691	2.1701	1.1178	0.011953	0.28185	0.24477	-2.0305	0.24904	0.83103	0.45073	-1.1497	0.014279	0.26458	0.37904	-1.3996	0.31277	0.87225	0.46739	-1.0973	0.58989	0.84975	0.96692	-0.048532	0.5855	0.99034	1.0295	0.041905	0.26648	0.74026	1.5779	0.65797	0.86793	0.99192	0.78682	-0.34589	0.57801	0.8468	0.6885	-0.53847	0.51804	0.79363	1.3337	0.41548	0.65628	0.96871	0.73319	-0.44775
L-Methionine_Neg	0.61087	0.8691	0.91579	-0.12691	0.068277	0.31792	1.4518	0.53785	0.82688	0.92054	1.0805	0.11174	0.026997	0.26458	1.7787	0.83083	0.17222	0.85654	0.79308	-0.33445	0.10399	0.52791	1.6541	0.72603	0.93009	0.99034	0.99942	-0.00083815	0.011285	0.22326	1.4836	0.56913	0.011363	0.94807	0.65471	-0.61107	0.15446	0.60174	0.90837	-0.13864	0.026937	0.51885	0.66461	-0.58941	0.74082	0.96871	0.97358	-0.038634
Epinephrine-H2O_pos	0.61326	0.8691	0.96566	-0.05042	0.71899	0.8753	1.0302	0.042969	0.072508	0.75452	0.83761	-0.25565	0.52622	0.79846	1.0583	0.08169	0.234	0.85654	0.84587	-0.2415	0.49578	0.805	1.0937	0.12919	0.89572	0.99034	0.98549	-0.021093	0.0098811	0.2108	1.1621	0.21673	0.2396	0.94807	0.88697	-0.17305	0.26779	0.65918	1.0669	0.093445	0.59321	0.83171	0.9448	-0.081913	0.15627	0.86825	1.1095	0.14995
AICAR_Neg	0.6137	0.8691	1.1347	0.18237	0.99761	0.99761	0.9943	-0.0082478	0.93483	0.97171	1.0017	0.0025156	0.9326	0.96332	1.0199	0.028367	0.92285	0.97712	1.1294	0.17562	0.31888	0.69687	0.70651	-0.50122	0.34964	0.99034	0.73411	-0.44593	0.41589	0.81777	1.28	0.35609	0.98542	0.99654	1.0094	0.013477	0.47113	0.76516	0.73971	-0.43497	0.76541	0.89834	0.92912	-0.10606	0.77097	0.97923	0.88106	-0.18268
Cytidine Monophosphate_pos	0.61548	0.8691	0.92338	-0.115	0.98402	0.99512	1.0118	0.01691	0.39294	0.87727	0.86659	-0.20657	0.79931	0.93011	0.9824	-0.025613	0.39086	0.87679	0.85419	-0.22736	0.4959	0.805	1.1186	0.16171	0.50259	0.99034	1.1614	0.21586	0.20991	0.70222	0.83974	-0.25199	0.49786	0.94807	1.1236	0.16818	0.774	0.90477	0.96864	-0.045967	0.071436	0.51885	1.2643	0.33831	0.025255	0.75509	0.74678	-0.42125
4-Imidazoleacetate_pos	0.61684	0.8691	0.94082	-0.08801	0.051933	0.31792	0.84834	-0.23728	0.80479	0.91901	0.97928	-0.030213	0.60985	0.83808	1.1114	0.15243	0.46615	0.88133	1.083	0.1151	0.95624	0.99166	1.0127	0.018151	0.090125	0.99034	0.86839	-0.20358	0.32893	0.77152	1.1372	0.18546	0.2192	0.94807	1.2181	0.28462	0.59524	0.8543	1.0656	0.091677	0.054662	0.51885	1.2556	0.32837	0.91871	0.99333	1.0548	0.077033
Deoxyinosine_pos_1	0.61894	0.8691	1.0306	0.043437	0.51161	0.73405	0.96115	-0.057173	0.17047	0.77686	0.93696	-0.09394	0.11423	0.3967	0.88264	-0.18011	0.82948	0.95877	1.0209	0.029804	0.1349	0.55659	0.87624	-0.19061	0.87663	0.99034	1.0092	0.013172	0.17998	0.70208	1.1128	0.15421	0.54276	0.94807	1.0621	0.086856	0.29191	0.67004	1.0996	0.13703	0.41301	0.77771	1.0842	0.11663	0.74069	0.96871	1.0643	0.089856
Palmitic Acid_Neg	0.62452	0.8691	1.1958	0.25802	0.25929	0.53042	1.1235	0.168	0.76158	0.90741	0.96927	-0.045032	0.75321	0.90954	0.96625	-0.049536	0.90001	0.97182	1.0277	0.039402	0.17093	0.60711	1.1686	0.22473	0.93786	0.99034	1.0142	0.020376	0.71077	0.88666	0.96939	-0.044857	0.33945	0.94807	0.79435	-0.33215	0.52915	0.80759	0.94504	-0.081553	0.8377	0.93475	0.95738	-0.062833	0.50846	0.92756	1.0949	0.13078
Salicylurate_pos	0.62526	0.8691	1.06	0.084031	0.69439	0.84997	0.96709	-0.04828	0.50087	0.87727	1.1737	0.23102	0.9278	0.96332	1.0079	0.011415	0.91059	0.97361	0.91513	-0.12795	0.55745	0.84315	0.91829	-0.12297	0.70019	0.99034	0.86427	-0.21044	0.068062	0.49986	1.673	0.74244	0.3281	0.94807	1.2423	0.31296	0.15876	0.60344	1.4064	0.49203	0.91686	0.96888	1.0673	0.094027	0.75332	0.96871	1.1504	0.20219
Oxoguanine/3-Methoxytyramine_pos	0.62588	0.8691	1.0202	0.028799	0.22839	0.49912	0.90712	-0.14064	0.13589	0.76648	0.94726	-0.078162	0.61608	0.84005	0.94742	-0.077926	0.21813	0.85654	0.91156	-0.13359	0.49627	0.805	0.93705	-0.093798	0.72485	0.99034	0.97481	-0.036802	0.14058	0.64266	1.0423	0.05981	0.66618	0.96142	1.0471	0.066391	0.76937	0.90477	1.0169	0.024242	0.54929	0.81845	1.0654	0.091397	0.76629	0.97806	1.0232	0.033057
Nicotinamide Riboside_pos	0.62908	0.8691	0.97979	-0.029458	0.19261	0.47631	0.90376	-0.14598	0.602	0.90341	0.98339	-0.024166	0.84806	0.94742	1.0262	0.037304	0.76425	0.94371	1.0183	0.026127	0.35939	0.72526	0.91272	-0.13176	0.25461	0.99034	0.91889	-0.12203	0.55581	0.84878	0.97403	-0.037961	0.91574	0.9961	1.0138	0.019819	0.83619	0.93864	0.99047	-0.013819	0.28904	0.70217	1.1057	0.14501	0.92722	0.99333	1.0139	0.019925
Symmetric Dimethylarginine_pos	0.63062	0.8691	0.96302	-0.05436	0.045102	0.31792	0.79404	-0.33271	0.12289	0.75452	0.87332	-0.19541	0.67039	0.85322	1.0358	0.050723	0.3272	0.87225	0.91194	-0.13299	0.70976	0.88081	0.96036	-0.05836	0.95451	0.99034	1.0123	0.017632	0.0046833	0.19058	1.3289	0.41019	0.20025	0.94807	1.225	0.29279	0.013218	0.30546	1.3236	0.40449	0.015621	0.5013	1.4245	0.51045	0.24148	0.86825	1.3048	0.38379
Sorbitol_Neg	0.63465	0.8691	0.9304	-0.10407	0.01279	0.28391	1.2913	0.36877	0.75249	0.90741	0.9539	-0.068095	0.086464	0.35215	1.3919	0.477	0.81296	0.95342	0.98384	-0.023505	0.0064533	0.36477	1.8182	0.86253	0.82253	0.99034	1.0511	0.071865	0.71588	0.88666	0.97144	-0.041802	0.53951	0.94807	0.81825	-0.28939	0.074841	0.537	0.85567	-0.22488	0.63019	0.83647	1.1235	0.16806	0.99796	0.99919	1.0289	0.041117
5-Hydroxyindoleacetate_pos	0.63603	0.8691	0.8168	-0.29195	0.271	0.53908	1.2546	0.32722	0.72412	0.90741	0.8417	-0.24862	0.18949	0.51361	1.634	0.70838	0.78772	0.94865	0.88499	-0.17627	0.16745	0.60711	1.3571	0.44048	0.20867	0.99034	1.2188	0.28546	0.80003	0.92017	0.97388	-0.03818	0.434	0.94807	1.2346	0.30409	0.0066088	0.27418	1.7588	0.81461	0.23013	0.67645	1.4981	0.58312	0.069195	0.75509	1.5715	0.6521
Spermine_pos	0.63619	0.8691	0.93706	-0.093781	0.74009	0.88404	1.0313	0.044479	0.75407	0.90741	0.96001	-0.058886	0.071812	0.34203	0.75856	-0.39867	0.66567	0.90705	0.94295	-0.084746	0.14622	0.55908	0.79185	-0.33671	0.36032	0.99034	1.1181	0.16101	0.44308	0.83274	0.86313	-0.21235	0.23139	0.94807	0.93387	-0.098707	0.8917	0.95799	0.96814	-0.046706	0.67829	0.85167	1.0994	0.13671	0.8279	0.99333	0.95586	-0.065132
Linolenic Acid_pos	0.63627	0.8691	0.94993	-0.074102	0.85859	0.92022	1.1951	0.25709	0.68062	0.90741	0.95686	-0.063622	0.86214	0.94742	1.0429	0.060647	0.57292	0.88885	0.93356	-0.099184	0.24327	0.66861	1.1319	0.17876	0.18256	0.99034	0.66751	-0.58314	0.52865	0.83956	1.1982	0.26087	0.73884	0.9787	0.87513	-0.19244	0.34216	0.70196	1.1543	0.20698	0.68573	0.85361	1.0447	0.063152	0.28307	0.86864	1.1879	0.2484
Ureidopropionic Acid_Neg	0.63666	0.8691	0.9573	-0.062958	0.014772	0.28773	1.5939	0.67254	0.48437	0.87727	1.0964	0.13274	0.00095236	0.15877	1.3468	0.42952	0.69533	0.91148	1.022	0.031327	0.013368	0.36477	1.4583	0.54428	0.99399	0.99614	1.0091	0.013008	0.60389	0.86572	0.9361	-0.095267	0.46159	0.94807	0.88962	-0.16873	0.90577	0.95923	1.0189	0.027074	0.4128	0.77771	0.88014	-0.18419	0.91855	0.99333	1.0149	0.021375
Glycerophosphocholine_pos	0.63881	0.8691	0.74266	-0.42922	0.57864	0.76923	1.0756	0.10514	0.74906	0.90741	0.95992	-0.059019	0.4398	0.74923	1.0882	0.122	0.84917	0.96078	1.0435	0.061489	0.60165	0.8584	0.93297	-0.10009	0.37271	0.99034	0.78262	-0.35361	0.22567	0.73783	1.2851	0.36192	0.042534	0.94807	1.7429	0.80149	0.0012732	0.20311	1.8531	0.88997	0.30993	0.71201	1.8256	0.86839	0.80083	0.98563	1.2406	0.31107
4-Aminobenzoic Acid_Neg	0.64031	0.8691	1.0909	0.12554	0.1582	0.46324	0.68276	-0.55056	0.54818	0.88108	1.0992	0.13649	0.9974	0.99742	1.0053	0.0075651	0.49487	0.88133	1.1339	0.18129	0.61428	0.8614	0.94428	-0.08272	0.34137	0.99034	1.4087	0.49436	0.2992	0.74994	1.408	0.49362	0.10174	0.94807	1.6753	0.74442	0.71263	0.8996	0.72552	-0.46291	0.18236	0.6521	1.8351	0.87583	0.72702	0.96871	1.0214	0.030513
Thiamine Monophosphate_pos	0.64122	0.8691	0.93175	-0.10199	0.080405	0.34802	0.79667	-0.32795	0.88917	0.94942	1.0841	0.11656	0.12728	0.4132	1.3206	0.40119	0.59094	0.88885	0.91936	-0.1213	0.82626	0.93835	1.1019	0.13997	0.51281	0.99034	0.94329	-0.084223	0.23627	0.74026	1.1873	0.24763	0.2293	0.94807	1.0874	0.12093	0.16858	0.60906	1.3282	0.40952	0.16876	0.64476	1.235	0.30453	0.61176	0.96503	1.1393	0.18809
Glycerol-3-Phosphate_Neg	0.64213	0.8691	1.0417	0.058916	0.027358	0.28773	1.743	0.80156	0.023511	0.75452	1.3133	0.39325	0.044531	0.27329	1.664	0.73467	0.0048925	0.54796	1.4061	0.49173	0.025277	0.40824	1.6788	0.74747	0.28943	0.99034	0.82672	-0.27453	0.65041	0.86804	1.1109	0.15168	0.31526	0.94807	0.89925	-0.15321	0.23345	0.65778	1.2602	0.3336	0.07069	0.51885	0.84236	-0.24749	0.56828	0.93599	1.1361	0.18407
Dopamine_Neg	0.647	0.87089	0.9442	-0.08283	0.068729	0.31792	1.2375	0.30746	0.44066	0.87727	1.0856	0.11845	0.42612	0.74923	1.0833	0.11549	0.90249	0.97182	1.0021	0.0030573	0.76309	0.90922	0.96764	-0.047453	0.55861	0.99034	1.1602	0.21443	0.61387	0.86572	0.96296	-0.054447	0.50433	0.94807	0.93133	-0.10263	0.62805	0.86402	0.96619	-0.04962	0.38175	0.77771	0.92893	-0.10636	0.82246	0.99333	1.0203	0.028938
Propionylcarnitine_pos	0.64734	0.87089	0.9485	-0.076284	0.5345	0.74124	0.93095	-0.10323	0.11065	0.75452	0.7901	-0.3399	0.87002	0.94742	0.99022	-0.014174	0.3053	0.87225	0.84137	-0.24919	0.50924	0.81188	0.92514	-0.11225	0.85446	0.99034	0.98186	-0.026405	0.79994	0.92017	1.0277	0.039432	0.99334	0.99657	1.0049	0.0070959	0.79184	0.9148	0.97604	-0.034988	0.8114	0.92761	1.0307	0.043664	0.84466	0.99333	0.99866	-0.0019346
L-Alpha-Aminobutyric Acid_pos	0.6525	0.87521	0.95366	-0.068448	0.63626	0.80863	1.0433	0.061212	0.37246	0.87727	0.93089	-0.10332	0.084291	0.35215	1.3911	0.47626	0.50215	0.88133	1.1517	0.20381	0.19468	0.6251	1.3343	0.41607	0.26506	0.99034	0.8423	-0.2476	0.075068	0.51377	1.3027	0.38146	0.72089	0.9787	1.0704	0.098102	0.0067417	0.27418	1.7165	0.77943	0.062819	0.51885	1.3496	0.43254	0.23187	0.86825	1.3691	0.45321
Mesaconic Acid_pos_1	0.65652	0.87586	1.053	0.074522	0.12493	0.41769	0.83906	-0.25316	0.067715	0.75452	0.88969	-0.16862	0.95899	0.97351	1.0154	0.02204	0.38131	0.87559	0.92189	-0.11734	0.76649	0.91005	0.96665	-0.04893	0.77384	0.99034	0.97419	-0.037732	0.53784	0.83956	1.04	0.056627	0.39749	0.94807	1.1256	0.17066	0.91565	0.95923	1.0131	0.01879	0.065749	0.51885	1.2495	0.32132	0.71046	0.96871	1.0818	0.1135
2-Hydroxy-3-Methylbutyric Acid_Neg	0.66039	0.87586	1.7973	0.84582	0.022853	0.28773	0.34007	-1.5561	0.49701	0.87727	0.62719	-0.67303	0.17829	0.49611	0.65072	-0.6199	0.26219	0.85912	0.49058	-1.0275	0.60118	0.8584	0.90899	-0.13767	0.98093	0.99034	0.81574	-0.29383	0.37401	0.80051	1.3232	0.40406	0.70422	0.97287	0.67315	-0.57099	0.81926	0.92918	0.81229	-0.29993	0.93982	0.97891	0.90257	-0.14789	0.29115	0.86957	0.51144	-0.96737
Azelaic Acid_Neg	0.66136	0.87586	0.97293	-0.039593	0.037785	0.31792	1.1667	0.22237	0.42349	0.87727	1.053	0.074569	0.63886	0.84009	1.0371	0.052529	0.55162	0.88885	1.0374	0.052954	0.26056	0.68666	1.0863	0.11944	0.74423	0.99034	0.97366	-0.038514	0.46249	0.83954	0.94138	-0.087155	0.49102	0.94807	0.94577	-0.080438	0.43836	0.76094	0.94346	-0.083964	0.41328	0.77771	0.9399	-0.089421	0.39646	0.90735	0.95255	-0.070126
Arginine_pos_2	0.66233	0.87586	0.92863	-0.10682	0.48932	0.72588	1.1161	0.15851	0.52781	0.87906	1.0693	0.096647	0.51307	0.78718	1.0995	0.13691	0.63516	0.89717	0.92266	-0.11612	0.29498	0.69687	1.3018	0.38052	0.21501	0.99034	1.2135	0.27913	0.72753	0.88828	1.0545	0.076504	0.6246	0.94807	1.0749	0.10422	0.29606	0.67004	1.2934	0.37112	0.51604	0.79363	1.1022	0.14041	0.40333	0.9098	1.2248	0.29257
L-Lysine_pos	0.66408	0.87586	1.0244	0.034819	0.83902	0.90905	0.97972	-0.029557	0.010322	0.74418	0.86974	-0.20134	0.034642	0.26458	1.3529	0.43602	0.85246	0.96197	0.99287	-0.010325	0.16309	0.59888	1.2541	0.3266	0.15732	0.99034	0.91495	-0.12824	0.046247	0.4333	1.1966	0.25891	0.36627	0.94807	1.1076	0.14744	0.072543	0.537	1.1712	0.22796	0.1193	0.58618	1.1968	0.25914	0.32584	0.89633	1.1232	0.16762
Hippurate_Neg	0.66689	0.87586	0.60318	-0.72933	0.00028897	0.10298	0.41852	-1.2566	0.82807	0.92054	1.0585	0.08201	0.059422	0.32465	1.4437	0.52981	0.90119	0.97182	0.8326	-0.2643	0.18786	0.61884	0.74212	-0.43027	0.030355	0.99034	0.47557	-1.0723	0.36989	0.80051	0.83348	-0.26278	0.32842	0.94807	0.75634	-0.4029	0.29198	0.67004	0.87987	-0.18463	0.21272	0.67645	0.67529	-0.56643	0.025619	0.75509	0.51048	-0.97006
Cystine_pos	0.66703	0.87586	0.88985	-0.16836	0.56478	0.76259	0.70337	-0.50765	0.46305	0.87727	0.83603	-0.25837	0.32364	0.66206	1.4221	0.50799	0.89733	0.97182	1.0459	0.064698	0.99658	0.99881	0.95413	-0.067744	0.48806	0.99034	1.3469	0.4296	0.11533	0.58715	0.68284	-0.55039	0.57147	0.94807	1.2543	0.32687	0.3371	0.69992	0.79446	-0.33196	0.70318	0.86352	1.1374	0.1857	0.17699	0.86825	0.72192	-0.47008
Acetoacetate_pos	0.66863	0.87586	1.0113	0.016226	0.21262	0.48847	0.91944	-0.12117	0.061709	0.75452	0.89752	-0.15599	0.74067	0.89924	0.97403	-0.037966	0.31855	0.87225	0.94682	-0.078838	0.99524	0.99881	1.0068	0.0098196	0.99614	0.99614	0.99994	-8.6299e-05	0.49614	0.83954	1.0278	0.039582	0.66137	0.96142	1.0484	0.068136	0.21871	0.64608	1.0621	0.086939	0.12026	0.58618	1.1258	0.17099	0.34154	0.89633	1.055	0.077216
Ascorbic Acid_pos	0.67407	0.88042	1.0255	0.036343	0.72887	0.8801	0.97935	-0.030102	0.7974	0.91834	0.98438	-0.022719	0.41637	0.74914	1.0432	0.06102	0.62782	0.89377	0.97362	-0.038568	0.6789	0.87463	0.97614	-0.034837	0.15502	0.99034	0.916	-0.12658	0.56945	0.85305	1.0389	0.055099	0.92673	0.9961	0.99542	-0.0066215	0.84509	0.93864	0.98371	-0.0237	0.55159	0.81913	0.97571	-0.03547	0.67551	0.96871	1.022	0.031325
Caffeine_pos	0.677	0.88168	0.98306	-0.024652	0.15188	0.4536	0.82555	-0.27657	0.13672	0.76648	0.9233	-0.11513	0.68004	0.86061	0.94398	-0.083167	0.68633	0.90705	0.97647	-0.034349	0.49773	0.805	0.9116	-0.13352	0.76657	0.99034	1.02	0.028516	0.76697	0.91013	1.0162	0.023188	0.81604	0.97971	1.0246	0.035095	0.17733	0.62066	0.92345	-0.11489	0.498	0.79363	1.0566	0.07949	0.82847	0.99333	1.0208	0.029657
Guanosine_pos	0.68478	0.88922	0.99157	-0.012221	0.63453	0.80863	0.96409	-0.052767	0.063956	0.75452	0.91343	-0.13063	0.63984	0.84009	0.95555	-0.065594	0.38307	0.87559	0.94653	-0.079275	0.69127	0.87479	0.96829	-0.046486	0.228	0.99034	0.93593	-0.095529	0.60856	0.86572	0.98416	-0.023042	0.61008	0.94807	1.0498	0.070104	0.56231	0.83693	1.0245	0.03486	0.84549	0.93708	1.0202	0.028853	0.87638	0.99333	1.0054	0.0077946
3-Methylamino-L-Alanine_pos_1	0.69599	0.89139	0.98594	-0.020427	0.063149	0.31792	0.82125	-0.2841	0.51838	0.87906	0.93859	-0.091428	0.939	0.96332	1.0129	0.018448	0.1898	0.85654	1.1605	0.21475	0.41139	0.75375	1.0722	0.10059	0.28374	0.99034	0.84576	-0.24167	0.27988	0.74026	1.268	0.34254	0.68098	0.97058	0.93423	-0.098152	0.76762	0.90477	1.1404	0.18951	0.5956	0.83171	0.91881	-0.12216	0.98455	0.99919	1.0039	0.0056087
Mevalonolactone_pos	0.69635	0.89139	0.95666	-0.063923	0.92809	0.97374	0.9958	-0.0060649	0.92414	0.96741	1.0082	0.011827	0.46859	0.7606	0.89666	-0.15736	0.49215	0.88133	0.92932	-0.10575	0.22017	0.64131	0.82896	-0.27062	0.61285	0.99034	1.0585	0.082047	0.57486	0.85305	1.041	0.057999	0.48626	0.94807	1.0477	0.067194	0.27342	0.66211	1.1493	0.20071	0.24263	0.67645	1.1771	0.2352	0.19333	0.86825	1.1856	0.24563
Purine_pos	0.70632	0.89139	0.94987	-0.074195	0.52724	0.74124	0.95693	-0.063521	0.4727	0.87727	0.89671	-0.15729	0.30328	0.65306	1.1205	0.16409	0.083886	0.85654	0.73393	-0.44628	0.31098	0.69687	1.2416	0.31223	0.8341	0.99034	0.96812	-0.046744	0.01581	0.25295	1.277	0.35271	0.27209	0.94807	0.84565	-0.24187	0.85948	0.94607	1.0143	0.020529	0.28886	0.70217	0.84853	-0.23695	0.18646	0.86825	1.1292	0.17536
Phenylpyruvate_Neg	0.70909	0.89139	1.0563	0.078966	0.065398	0.31792	1.352	0.43514	0.72974	0.90741	0.95174	-0.071355	0.65388	0.84665	0.98514	-0.021607	0.084508	0.85654	0.72026	-0.4734	0.046288	0.44435	1.3555	0.43882	0.70123	0.99034	1.1204	0.164	0.018397	0.2842	1.4603	0.54624	0.07317	0.94807	0.66139	-0.59642	0.22952	0.65778	0.83955	-0.2523	0.38591	0.77771	0.83366	-0.26246	0.039099	0.75509	1.2303	0.29896
Xanthurenic Acid_pos	0.71172	0.89139	0.96954	-0.044628	0.14825	0.4536	1.1316	0.17837	0.2343	0.83103	0.85009	-0.23431	0.6126	0.83929	1.0858	0.11873	0.37823	0.87552	0.88543	-0.17555	0.34128	0.7178	1.1536	0.20616	0.22062	0.99034	1.1208	0.16451	0.088028	0.5189	1.1107	0.15153	0.76134	0.9787	0.97323	-0.039146	0.4957	0.78196	1.0325	0.046182	0.036534	0.51885	1.3001	0.37864	0.74561	0.96871	1.0716	0.09972
2-Aminooctanoic Acid_pos	0.71306	0.89139	0.97227	-0.040564	0.0087849	0.26871	0.74539	-0.42393	0.88784	0.94942	1.0238	0.033986	0.068883	0.34203	1.2949	0.37287	0.030239	0.85654	0.76682	-0.38304	0.33044	0.70494	0.85458	-0.22671	0.9678	0.99034	1.003	0.0043545	0.52555	0.83956	0.97364	-0.038542	0.60278	0.94807	1.0791	0.10985	0.61305	0.85623	0.96755	-0.047584	0.83419	0.93475	0.98716	-0.01865	0.33516	0.89633	0.87056	-0.19999
IMP_Neg	0.71328	0.89139	0.98204	-0.026144	0.17535	0.46988	1.0976	0.1344	0.63662	0.90741	1.0137	0.019674	0.40204	0.74735	1.0537	0.075453	0.37535	0.87552	1.0384	0.054309	0.51652	0.81795	1.039	0.055129	0.95382	0.99034	0.99959	-0.00058801	0.31648	0.77057	0.9346	-0.097578	0.32598	0.94807	0.94997	-0.074046	0.32839	0.6913	0.94429	-0.082699	0.55588	0.82278	0.96407	-0.052791	0.33215	0.89633	0.94709	-0.078427
Methylcysteine_pos	0.716	0.89139	1.0996	0.13692	0.99597	0.99761	1.1046	0.14349	0.44612	0.87727	1.0782	0.10862	0.33425	0.67757	1.1267	0.17205	0.068834	0.85654	0.5846	-0.77447	0.074554	0.49851	1.3162	0.39638	0.23125	0.99034	1.4585	0.54447	0.077543	0.51377	1.2959	0.37395	0.35422	0.94807	1.2302	0.29886	0.30485	0.67004	1.0772	0.10735	0.33037	0.73466	1.2593	0.33266	0.34495	0.89633	1.1376	0.18595
Acetylphosphate_Neg	0.72033	0.89139	0.97129	-0.042027	0.21417	0.48953	1.2707	0.34558	0.30495	0.86557	1.1199	0.16335	0.030608	0.26458	1.8184	0.86265	0.032423	0.85654	1.3829	0.46768	0.024899	0.40824	1.8026	0.85011	0.90594	0.99034	1.0316	0.044819	0.9192	0.96667	1.021	0.029956	0.35233	0.94807	1.1347	0.18233	0.16811	0.60906	1.3242	0.40513	0.069048	0.51885	1.3018	0.38052	0.64842	0.96871	1.1352	0.18293
Threonine_pos	0.7206	0.89139	0.96478	-0.051731	0.45004	0.69763	1.116	0.15829	0.57322	0.88976	0.94206	-0.086104	0.048735	0.27906	1.5008	0.58571	0.21391	0.85654	0.87474	-0.19307	0.62276	0.8614	1.1653	0.22068	0.099011	0.99034	1.2594	0.33274	0.80744	0.92153	1.0262	0.037261	0.96461	0.9961	1.0137	0.019615	0.99431	0.99835	1.0057	0.0081438	0.51243	0.79363	1.1475	0.19856	0.54933	0.93599	0.94333	-0.084168
Biliverdin_pos	0.72105	0.89139	1.108	0.14797	0.10245	0.39565	0.72556	-0.46283	0.11392	0.75452	0.61754	-0.6954	0.012141	0.26458	0.33289	-1.5869	0.30505	0.87225	0.73247	-0.44915	0.24879	0.67116	0.70353	-0.50733	0.4637	0.99034	0.86709	-0.20574	0.13874	0.64266	0.75305	-0.40918	0.21708	0.94807	0.69218	-0.53079	0.12612	0.59525	0.63997	-0.64393	0.64753	0.83981	1.0234	0.033405	0.46368	0.92473	0.85656	-0.22337
Norvaline_pos	0.72137	0.89139	1.0195	0.027823	0.97407	0.9946	0.98776	-0.017772	0.36299	0.87727	0.9141	-0.12957	0.93697	0.96332	0.97417	-0.037754	0.018215	0.85654	0.81539	-0.29444	0.86484	0.95594	1.0403	0.05702	0.11394	0.99034	1.0946	0.13041	0.55184	0.84878	0.96469	-0.051863	0.63282	0.94807	1.0583	0.081782	0.6025	0.8543	1.0427	0.060294	0.18082	0.65182	1.0861	0.11913	0.62523	0.96871	1.0464	0.065447
Phosphoenolpyruvate_pos	0.72239	0.89139	0.98008	-0.029022	0.61174	0.79668	0.95312	-0.06927	0.11409	0.75452	0.91261	-0.13193	0.22674	0.55814	0.88593	-0.17474	0.2317	0.85654	0.73599	-0.44225	0.82608	0.93835	1.0187	0.02668	0.65751	0.99034	0.96413	-0.052701	0.31961	0.77152	1.1289	0.17491	0.81368	0.97971	1.0303	0.04308	0.20141	0.63081	1.0794	0.11028	0.49525	0.79363	1.0513	0.072219	0.63898	0.96871	1.0457	0.064529
2-Phosphoglycerate_Neg	0.72257	0.89139	0.98278	-0.025061	0.065729	0.31792	1.1643	0.21949	0.8453	0.93275	1.0107	0.015287	0.15362	0.46502	1.0613	0.085782	0.62564	0.89377	1.0259	0.036898	0.14414	0.55908	1.0835	0.11571	0.4596	0.99034	1.0605	0.084801	0.10891	0.58039	0.90234	-0.14825	0.97435	0.9961	0.99923	-0.0011112	0.31993	0.68909	0.951	-0.072479	0.72287	0.87095	0.97195	-0.04105	0.22516	0.86825	0.9129	-0.13148
L-Homoserine_pos	0.72396	0.89139	0.96857	-0.046079	0.45438	0.70194	1.143	0.19284	0.72536	0.90741	0.96697	-0.048464	0.031339	0.26458	1.5815	0.66126	0.24695	0.85654	0.89033	-0.16759	0.56498	0.84768	1.2142	0.28004	0.25101	0.99034	1.1995	0.26248	0.91825	0.96667	1.0144	0.020621	0.95943	0.9961	1.0137	0.019656	0.72629	0.8996	1.0456	0.064268	0.59529	0.83171	1.101	0.13882	0.46898	0.92473	0.91826	-0.12303
Retinal_pos	0.72521	0.89139	1.0331	0.046969	0.20165	0.48122	0.87929	-0.18559	0.033168	0.75452	0.90103	-0.15036	0.49671	0.77267	0.92435	-0.11349	0.58778	0.88885	0.96014	-0.058676	0.40511	0.75375	0.92083	-0.11899	0.61673	0.99034	0.96284	-0.054629	0.41391	0.81777	1.0612	0.085669	0.87199	0.99402	1.0184	0.026364	0.95897	0.98311	1.0073	0.010466	0.24845	0.67717	1.1371	0.18533	0.94319	0.99658	0.99769	-0.003331
Inosine_pos	0.7255	0.89139	0.997	-0.00434	0.63002	0.80863	0.68593	-0.54387	0.56306	0.88199	1.1444	0.19454	0.68234	0.8611	0.77377	-0.37002	0.8329	0.95922	1.0131	0.018798	0.60707	0.86003	0.66992	-0.57795	0.12599	0.99034	1.7576	0.81364	0.26528	0.74026	1.2223	0.28959	0.13747	0.94807	1.6963	0.76235	0.26276	0.65796	1.412	0.49776	0.29698	0.70419	1.8966	0.92343	0.84291	0.99333	1.0798	0.11083
Retinol_pos	0.72581	0.89139	0.94431	-0.082671	0.55752	0.76249	0.94772	-0.077464	0.41114	0.87727	0.88211	-0.18097	0.55675	0.81512	0.9634	-0.053797	0.75324	0.9426	0.94916	-0.075274	0.37317	0.73472	0.95326	-0.069054	0.027206	0.99034	0.80075	-0.32057	0.38586	0.80051	1.132	0.1789	0.079136	0.94807	1.2561	0.329	0.007037	0.27418	1.4113	0.49703	0.091053	0.55754	1.266	0.34024	0.50033	0.92756	1.0946	0.13043
Deoxyribose-5-Phosphate_Neg	0.7259	0.89139	1.0643	0.089941	0.0093688	0.26871	0.60346	-0.72867	0.81721	0.92054	0.89719	-0.15651	0.038349	0.26458	1.2492	0.32101	0.26818	0.85912	1.3281	0.4094	0.87169	0.95594	1.1061	0.14544	0.19396	0.99034	1.2892	0.36646	0.13132	0.62699	1.6912	0.75801	0.15856	0.94807	1.3839	0.46872	0.75274	0.90477	1.0923	0.12735	0.43219	0.77771	1.447	0.53304	0.89297	0.99333	1.0736	0.10249
Homoserine_pos	0.72624	0.89139	0.96216	-0.055649	0.47815	0.7214	1.1141	0.15582	0.85986	0.94185	0.98265	-0.025256	0.030683	0.26458	1.5457	0.62822	0.34249	0.87225	0.89828	-0.15476	0.47156	0.80033	1.229	0.29746	0.11102	0.99034	1.2751	0.35056	0.98353	0.99016	1.0066	0.0094379	0.78464	0.9787	1.0473	0.066695	0.90918	0.95923	1.0195	0.027892	0.59335	0.83171	1.1251	0.17009	0.47599	0.92473	0.91675	-0.1254
5-Methyluridine_Neg	0.73307	0.89439	1.0419	0.059259	0.025784	0.28773	0.49905	-1.0028	0.25317	0.83397	1.4207	0.50657	0.16236	0.47542	0.74531	-0.42409	0.62824	0.89377	1.0781	0.10848	0.11152	0.54294	0.81466	-0.29574	0.094924	0.99034	0.77844	-0.36134	0.1858	0.70208	0.7149	-0.48419	0.067984	0.94807	0.74079	-0.43286	0.076471	0.537	0.75234	-0.41054	0.22741	0.67645	0.90435	-0.14505	0.10191	0.83006	0.75086	-0.41339
Citrulline_pos	0.73397	0.89439	0.96575	-0.050282	0.23426	0.50301	1.1705	0.22717	0.49223	0.87727	0.91802	-0.1234	0.067795	0.34203	1.3898	0.47486	0.64816	0.90178	0.94494	-0.081701	0.22946	0.65338	1.3636	0.44745	0.28033	0.99034	1.0465	0.065529	0.41618	0.81777	1.1078	0.14765	0.61693	0.94807	1.0748	0.10413	0.26983	0.66056	1.222	0.28919	0.092415	0.55824	1.2127	0.27827	0.69483	0.96871	1.0849	0.11762
Phenyllactic Acid_Neg	0.73634	0.89439	0.94388	-0.083325	0.20763	0.48246	1.1473	0.19829	0.6488	0.90741	0.99814	-0.002688	0.37012	0.71782	1.2477	0.31931	0.42492	0.88133	0.83428	-0.2614	0.026297	0.40824	1.8484	0.8863	0.93261	0.99034	1.018	0.0258	0.63401	0.86804	0.95848	-0.061183	0.37605	0.94807	0.8404	-0.25086	0.16298	0.60344	0.82175	-0.28322	0.57407	0.83171	0.89496	-0.16011	0.97393	0.99919	1.0139	0.019953
Shikimic Acid_Neg	0.73667	0.89439	0.92947	-0.10552	0.055552	0.31792	0.5444	-0.87725	0.78984	0.91347	1.1025	0.14077	0.30843	0.65306	0.84356	-0.24543	0.37144	0.87552	1.1556	0.20869	0.69968	0.87479	1.0815	0.11298	0.069761	0.99034	0.67552	-0.56594	0.045984	0.4333	0.61422	-0.70316	0.50568	0.94807	0.89273	-0.1637	0.45315	0.76516	0.90586	-0.14264	0.049458	0.51885	0.71688	-0.4802	0.13384	0.8572	0.72829	-0.45741
3-Hydroxyphenylacetic Acid_Neg	0.7434	0.90002	0.96742	-0.047781	0.78377	0.8951	0.97464	-0.037055	0.52002	0.87906	0.92943	-0.10558	0.49509	0.77267	0.93479	-0.097292	0.032544	0.85654	0.78216	-0.35446	0.20439	0.63873	1.1023	0.14047	0.25205	0.99034	1.1747	0.23226	0.71881	0.88713	1.0585	0.082064	0.41914	0.94807	0.92505	-0.1124	0.33746	0.69992	0.9124	-0.13226	0.68938	0.85361	0.96361	-0.053475	0.0034508	0.37568	1.1807	0.23964
Acetylphosphate_pos	0.74571	0.90002	1.0175	0.025076	0.75656	0.89135	0.97613	-0.034852	0.16977	0.77686	0.92612	-0.11073	0.36785	0.71782	0.91322	-0.13097	0.19388	0.85654	0.92861	-0.10685	0.6932	0.87479	1.0387	0.054804	0.47365	0.99034	0.91939	-0.12124	0.27354	0.74026	1.0454	0.064115	0.79937	0.9787	1.0274	0.039008	0.067192	0.537	1.1076	0.14744	0.51001	0.79363	1.0743	0.10338	0.36675	0.90025	1.0755	0.10504
Propionyl-CoA_Neg	0.74734	0.90002	1.0408	0.057723	0.51203	0.73405	1.1119	0.15301	0.45119	0.87727	0.86987	-0.20113	0.37959	0.72673	1.174	0.2314	0.42514	0.88133	1.0648	0.090562	0.29406	0.69687	1.2428	0.31363	0.49549	0.99034	1.0447	0.063023	0.47565	0.83954	1.1468	0.19764	0.54137	0.94807	0.97118	-0.042183	0.75021	0.90477	0.87309	-0.1958	0.85846	0.94052	1.013	0.018669	0.75781	0.97	1.0107	0.01531
Alanine_pos	0.75563	0.90676	1.0403	0.056945	0.96575	0.9946	0.9488	-0.075826	0.30682	0.86557	0.83446	-0.26109	0.43339	0.74923	1.1873	0.24765	0.057167	0.85654	0.74816	-0.41858	0.31782	0.69687	1.3787	0.46335	0.052383	0.99034	1.3324	0.41401	0.49525	0.83954	0.86076	-0.21631	0.4722	0.94807	0.91014	-0.13584	0.73497	0.8996	0.91587	-0.12679	0.9976	0.9976	1.0115	0.016531	0.82283	0.99333	0.93411	-0.098342
4-Pyridoxate_pos	0.75698	0.90676	1.0577	0.080924	0.065911	0.31792	0.48027	-1.0581	0.53452	0.88108	0.86702	-0.20587	0.28602	0.63771	0.72912	-0.45577	0.78151	0.94371	1.1825	0.24184	0.12104	0.55015	0.56075	-0.83457	0.41834	0.99034	1.4905	0.57575	0.76792	0.91013	1.0661	0.092393	0.79515	0.9787	1.1129	0.15433	0.26646	0.65918	1.305	0.38405	0.33779	0.73924	1.5021	0.58697	0.75464	0.96871	1.2567	0.32967
Abscisic Acid_pos	0.76297	0.91149	1.0148	0.021124	0.20785	0.48246	0.90301	-0.14718	0.2766	0.85145	0.93243	-0.10094	0.62629	0.84005	0.95383	-0.068191	0.51226	0.88133	0.95397	-0.067981	0.64173	0.86606	0.9574	-0.0628	0.66382	0.99034	0.97842	-0.031469	0.10039	0.56216	1.0367	0.051997	0.8594	0.98899	1.0149	0.021339	0.9038	0.95923	1.0109	0.015588	0.2458	0.67645	1.0975	0.13423	0.71783	0.96871	1.0374	0.052931
L-Glutamic Acid_pos	0.77029	0.91556	1.0647	0.090478	0.027846	0.28773	1.1098	0.15026	0.13858	0.76648	0.83959	-0.25224	0.13794	0.43829	1.3131	0.39294	0.71521	0.92542	0.97084	-0.042691	0.17482	0.60711	1.3298	0.41117	0.86034	0.99034	1.0139	0.019943	0.59329	0.86297	1.0225	0.032064	0.82521	0.97971	1.016	0.022963	0.51604	0.79719	1.0691	0.096373	0.22466	0.67645	1.2415	0.3121	0.84727	0.99333	1.0402	0.056882
Phosphoserine_pos	0.77174	0.91556	1.0775	0.10763	0.97462	0.9946	0.91195	-0.13298	0.96419	0.97819	0.98361	-0.023842	0.79348	0.92578	1.1341	0.1816	0.22848	0.85654	1.3565	0.43985	0.8329	0.93989	0.93215	-0.10136	0.92457	0.99034	1.04	0.056626	0.49033	0.83954	1.2326	0.30172	0.78408	0.9787	0.8939	-0.16182	0.97127	0.98769	0.99169	-0.01204	0.14594	0.61541	1.599	0.67714	0.27548	0.86825	1.3325	0.41411
N-Glycyl-L-Proline_pos	0.7725	0.91556	0.9717	-0.041425	0.2729	0.53908	1.3616	0.44531	0.5561	0.88108	1.0834	0.1155	0.8518	0.94742	0.9675	-0.04766	0.7294	0.92719	0.96571	-0.050342	0.75621	0.90584	1.1591	0.21295	0.25938	0.99034	1.8944	0.92173	0.62936	0.86755	1.0825	0.11434	0.50075	0.94807	1.0979	0.13474	0.19629	0.63081	1.2435	0.31444	0.35197	0.74289	1.061	0.085389	0.46973	0.92473	1.1405	0.18969
5-Aminovaleric Acid_pos	0.77518	0.91631	0.96914	-0.045227	0.33433	0.59113	0.93591	-0.095557	0.86784	0.94473	1.0444	0.06269	0.30755	0.65306	1.1784	0.23685	0.15532	0.85654	0.84772	-0.23834	0.71245	0.8817	1.1495	0.20095	0.15298	0.99034	1.2077	0.27225	0.42168	0.82494	1.0857	0.11857	0.31666	0.94807	1.0643	0.089848	0.90651	0.95923	1.0064	0.0092466	0.13353	0.6104	1.1541	0.20677	0.87474	0.99333	1.0432	0.061057
Adenine_pos	0.77838	0.91766	1.0112	0.016121	0.53138	0.74124	0.95482	-0.066696	0.26427	0.85069	0.9363	-0.094957	0.56717	0.82397	0.94622	-0.079749	0.25237	0.85654	0.91781	-0.12374	0.41156	0.75375	0.93287	-0.10025	0.14975	0.99034	0.92852	-0.10699	0.34091	0.77856	1.0396	0.056014	0.47144	0.94807	1.0675	0.094284	0.2017	0.63081	1.0695	0.096977	0.42941	0.77771	1.0676	0.09439	0.2561	0.86825	1.0886	0.12246
IDP_pos	0.78525	0.92052	1.1843	0.244	0.26066	0.53081	0.44745	-1.1602	0.68127	0.90741	0.79443	-0.33201	0.86071	0.94742	0.97837	-0.031547	0.80782	0.95237	0.90772	-0.13969	0.69328	0.87479	0.96678	-0.048747	0.46474	0.99034	2.2718	1.1839	0.08601	0.51377	2.4197	1.2748	0.020792	0.94807	3.3761	1.7554	0.094186	0.537	2.2335	1.1593	0.012127	0.5013	3.7608	1.9111	0.50001	0.92756	1.3161	0.39628
Aminosugar Phosphates_pos	0.7867	0.92052	0.90229	-0.14834	0.58346	0.77106	1.3947	0.47997	0.53686	0.88108	1.028	0.039842	0.21628	0.54769	1.5539	0.63585	0.55035	0.88885	1.0126	0.018042	0.67952	0.87463	1.234	0.30333	0.51176	0.99034	0.85844	-0.22021	0.27443	0.74026	0.66625	-0.58586	0.2063	0.94807	0.63418	-0.65705	0.46521	0.76516	1.1878	0.2483	0.43581	0.77922	0.78998	-0.34011	0.67079	0.96871	0.9669	-0.048565
L-Threonine_pos	0.78696	0.92052	0.97482	-0.036792	0.40392	0.6586	1.147	0.19783	0.70946	0.90741	0.96108	-0.057269	0.02847	0.26458	1.6013	0.67923	0.29291	0.87225	0.89136	-0.16592	0.43377	0.77541	1.2425	0.31326	0.13061	0.99034	1.2245	0.29224	0.78674	0.91786	1.0298	0.042382	0.88404	0.9961	1.0266	0.037904	0.67574	0.88369	1.0501	0.070494	0.69301	0.85573	1.1097	0.15023	0.64712	0.96871	0.95478	-0.066764
4-Pyridoxate_Neg	0.79216	0.92419	0.95651	-0.064142	0.84006	0.90905	0.92689	-0.10953	0.28128	0.85145	1.3861	0.47104	0.62898	0.84009	1.0935	0.12896	0.68822	0.90705	1.0364	0.051549	0.49167	0.805	0.81162	-0.30113	0.3293	0.99034	0.86312	-0.21237	0.71298	0.88666	0.93297	-0.1001	0.64186	0.94807	0.92735	-0.10881	0.066108	0.537	0.68646	-0.54276	0.84052	0.93475	1.0551	0.077321	0.21609	0.86825	0.79012	-0.33986
Deoxyadenosine Triphosphate_Neg	0.79529	0.92543	0.99271	-0.010559	0.33515	0.59113	1.3071	0.38632	0.94559	0.97546	0.99694	-0.0044181	0.78235	0.92235	0.94568	-0.080575	0.28626	0.86651	1.0927	0.12795	0.25387	0.67699	0.73196	-0.45016	0.066651	0.99034	2.0971	1.0684	0.37999	0.80051	0.88327	-0.17907	0.33902	0.94807	1.6126	0.68943	0.32525	0.6913	0.76713	-0.38245	0.11438	0.58521	1.7028	0.76787	0.50219	0.92756	0.91147	-0.13373
L-Leucine_pos	0.80122	0.92764	1.0228	0.03259	0.68779	0.84419	1.0639	0.089351	0.64805	0.90741	1.1857	0.24569	0.069147	0.34203	1.3107	0.3903	0.091948	0.85654	0.81759	-0.29055	0.40928	0.75375	1.4919	0.5772	0.045544	0.99034	1.1061	0.14545	0.011462	0.22326	1.2135	0.27921	0.51502	0.94807	0.96528	-0.050978	0.11009	0.56048	1.1388	0.18755	0.34401	0.73929	0.90775	-0.13963	0.70706	0.96871	1.0718	0.099969
Dimethylglycine_pos	0.80184	0.92764	1.0314	0.044616	0.6529	0.8125	0.95777	-0.062247	0.43986	0.87727	0.9163	-0.12612	0.037357	0.26458	1.2796	0.35568	0.69638	0.91148	1.0764	0.10618	0.056365	0.47457	1.3207	0.40134	0.78254	0.99034	0.9449	-0.081766	0.32619	0.77152	1.1279	0.17363	0.90813	0.9961	1.0231	0.032954	0.0094664	0.27418	1.4614	0.54737	0.12556	0.5908	1.2941	0.37191	0.16885	0.86825	1.4172	0.50308
Orotate_Neg	0.8034	0.92764	0.97883	-0.030871	0.15049	0.4536	1.1514	0.2034	0.61501	0.90341	1.0337	0.047752	0.12991	0.41869	1.1909	0.25204	0.15286	0.85654	1.1144	0.15622	0.18309	0.61673	1.1315	0.17824	0.88536	0.99034	0.98053	-0.028365	0.89325	0.9578	1.0495	0.069637	0.56393	0.94807	1.0471	0.066421	0.13275	0.59525	1.1449	0.19516	0.7657	0.89834	1.033	0.046875	0.26766	0.86825	1.1049	0.14391
3-4-Hydroxyphenylpropionate_Neg	0.81383	0.93646	0.96722	-0.048091	0.10894	0.40807	1.1565	0.20975	0.87125	0.94473	1.1182	0.16111	0.25157	0.58695	1.1568	0.21013	0.32976	0.87225	0.85996	-0.21765	0.040579	0.44435	1.3743	0.45867	0.97244	0.99034	0.99027	-0.014112	0.55829	0.84878	0.95308	-0.069336	0.32048	0.94807	0.8384	-0.25429	0.13664	0.59525	0.84727	-0.23911	0.2599	0.69153	0.82385	-0.27955	0.12161	0.84471	0.92179	-0.11749
5-Methylthioadenosine_pos	0.81522	0.93646	0.94013	-0.089075	0.56455	0.76259	0.91787	-0.12363	0.76137	0.90741	1.0459	0.064688	0.19337	0.51565	1.3026	0.38143	0.47539	0.88133	1.1863	0.24647	0.79639	0.93398	1.1335	0.18078	0.26461	0.99034	0.77715	-0.36373	0.051	0.44022	1.2374	0.30731	0.47293	0.94807	1.1612	0.21566	0.016348	0.31843	1.6963	0.76242	0.29809	0.70419	1.2557	0.32848	0.3737	0.90025	1.522	0.60598
Deoxyguanosine_Neg	0.82699	0.94104	0.98866	-0.016448	0.046013	0.31792	1.1145	0.15639	0.72387	0.90741	0.98116	-0.027434	0.41248	0.74914	1.0637	0.089062	0.3181	0.87225	1.0608	0.085139	0.73082	0.89212	0.98055	-0.028337	0.63051	0.99034	0.9549	-0.066576	0.24894	0.74026	0.9039	-0.14577	0.42011	0.94807	0.91863	-0.12244	0.24768	0.65796	0.92588	-0.11111	0.13792	0.6104	0.88406	-0.17778	0.23693	0.86825	0.92564	-0.11148
Hippuric Acid_pos	0.82722	0.94104	0.70451	-0.5053	0.0017816	0.12754	0.28959	-1.7879	0.90243	0.95997	1.0219	0.031246	0.39815	0.74735	1.1628	0.21756	0.99814	0.99861	0.82676	-0.27446	0.22188	0.64131	0.67464	-0.56781	0.068543	0.99034	0.49735	-1.0077	0.49883	0.83954	0.8933	-0.16278	0.63711	0.94807	0.82972	-0.2693	0.65208	0.87727	0.95902	-0.060365	0.50777	0.79363	0.7903	-0.33954	0.11286	0.83784	0.56767	-0.81688
Folic Acid_Neg	0.83244	0.94104	0.98936	-0.015434	0.057769	0.31792	1.0894	0.1235	0.76067	0.90741	0.98919	-0.015681	0.83658	0.94742	1.016	0.022918	0.8616	0.96499	0.9928	-0.010429	0.49612	0.805	1.0433	0.061149	0.82612	0.99034	0.98378	-0.023599	0.56884	0.85305	0.96317	-0.054142	0.77724	0.9787	0.97924	-0.030273	0.43025	0.76094	0.95763	-0.062454	0.45391	0.77931	0.94912	-0.075331	0.047589	0.75509	0.92959	-0.10533
Asparagine_pos	0.83342	0.94104	0.9796	-0.02973	0.83824	0.90905	1.0139	0.019848	0.19942	0.77686	0.84964	-0.23508	0.88863	0.95474	0.9598	-0.059188	0.10477	0.85654	0.74606	-0.42264	0.65247	0.87115	1.1183	0.16134	0.74045	0.99034	1.0337	0.047842	0.6231	0.86638	0.94656	-0.079236	0.22673	0.94807	0.89491	-0.16019	0.65204	0.87727	0.94891	-0.075656	0.40749	0.77771	0.9136	-0.13036	0.59578	0.95667	1.0699	0.097469
8-Hydroxyguanosine_pos	0.83408	0.94104	1.0815	0.11298	0.62845	0.80863	0.93507	-0.09685	0.44934	0.87727	1.42	0.50591	0.3122	0.65306	0.75175	-0.41167	0.24556	0.85654	1.6267	0.70193	0.58665	0.84781	0.91229	-0.13244	0.82611	0.99034	0.92504	-0.11241	0.62833	0.86755	0.82722	-0.27365	0.75727	0.9787	0.98574	-0.020719	0.7299	0.8996	1.1207	0.16445	0.8089	0.92713	1.0168	0.024103	0.49084	0.92756	0.78831	-0.34316
N1-Methylnicotinamide_pos	0.83516	0.94104	0.97765	-0.032617	0.24487	0.51504	1.0737	0.10263	0.50741	0.87906	0.94005	-0.089189	0.22811	0.55843	0.87715	-0.18911	0.11126	0.85654	0.84828	-0.23739	0.63444	0.86392	1.0426	0.06013	0.73936	0.99034	0.96946	-0.044751	0.23718	0.74026	1.1504	0.20212	0.28773	0.94807	1.0944	0.1301	0.15147	0.59525	1.1574	0.21086	0.22213	0.67645	1.1048	0.14373	0.61033	0.96503	1.0695	0.096875
L-Ornithine_Neg	0.83585	0.94104	1.033	0.046829	0.045416	0.31792	1.7646	0.81931	0.69325	0.90741	1.0304	0.043219	0.0083848	0.26458	2.3323	1.2217	0.61944	0.89377	1.0747	0.10398	0.01155	0.36477	2.0398	1.0284	0.75959	0.99034	0.91776	-0.12381	0.86058	0.94636	1.0747	0.10394	0.93197	0.9961	0.94323	-0.084315	0.52496	0.80542	1.1014	0.13928	0.54696	0.8177	0.8402	-0.25119	0.38387	0.90513	1.2419	0.31256
Aminobenzoic Acid_Neg	0.83601	0.94104	1.0075	0.010802	0.4054	0.6586	1.0637	0.089082	0.0467	0.75452	1.1914	0.25268	0.097538	0.36562	0.6027	-0.73048	0.99861	0.99861	1.1145	0.15634	0.922	0.97649	0.99201	-0.011579	0.27163	0.99034	0.64009	-0.64366	0.75799	0.90797	1.0373	0.052828	0.25542	0.94807	1.339	0.42116	0.72305	0.8996	0.96482	-0.051674	0.95661	0.98921	0.9492	-0.07521	0.15664	0.86825	0.62993	-0.66674
L-Arginine_pos	0.84676	0.94955	1.0079	0.011388	0.98691	0.9958	0.9724	-0.040372	0.43575	0.87727	0.88607	-0.17451	0.17657	0.49611	1.374	0.45838	0.89404	0.97182	1.014	0.019988	0.31512	0.69687	1.3762	0.46072	0.045363	0.99034	1.4	0.48542	0.5279	0.83956	1.0442	0.062436	0.34415	0.94807	1.2226	0.28995	0.39818	0.74328	1.1462	0.19681	0.015609	0.5013	1.6111	0.68803	0.62879	0.96871	0.94486	-0.081835
Carbamoyl Phosphates_Neg	0.84781	0.94955	0.97862	-0.031185	0.020177	0.28773	1.4994	0.58442	0.87304	0.94473	0.98598	-0.020371	0.1141	0.3967	1.6059	0.68341	0.2453	0.85654	1.2402	0.31054	0.046747	0.44435	1.9199	0.941	0.81132	0.99034	1.092	0.12703	0.18528	0.70208	0.85092	-0.23291	0.64592	0.94807	0.8963	-0.15795	0.14968	0.59525	1.1685	0.2246	0.51653	0.79363	1.1195	0.16289	0.97538	0.99919	1.0367	0.051946
Imidazole_pos	0.85177	0.94962	1.023	0.032779	0.02272	0.28773	0.79	-0.34008	0.11434	0.75452	1.216	0.28218	0.38957	0.73953	0.9144	-0.1291	0.9561	0.98241	1.0032	0.0045943	0.1352	0.55659	0.57696	-0.79345	0.92198	0.99034	1.0242	0.034471	0.81648	0.92369	0.94679	-0.078886	0.13438	0.94807	1.5723	0.65284	0.37563	0.72785	0.76656	-0.38353	0.17172	0.65048	1.4709	0.55672	0.273	0.86825	0.69851	-0.51764
Picolinic Acid_Neg	0.85447	0.94962	0.98958	-0.015107	0.041737	0.31792	1.2482	0.31981	0.19706	0.77686	1.0852	0.118	0.66574	0.85322	1.0291	0.041351	0.92477	0.97712	1.0079	0.01141	0.89627	0.96059	1.0093	0.013324	0.56462	0.99034	1.1284	0.17432	0.73764	0.89556	0.98065	-0.028184	0.76733	0.9787	1.0861	0.11915	0.90584	0.95923	0.99932	-0.00097713	0.24667	0.67645	0.91017	-0.1358	0.99068	0.99919	1.0052	0.0074236
N-Acetyl Tryptophan_Neg	0.85489	0.94962	0.96153	-0.0566	0.98122	0.99499	0.98339	-0.024165	0.48452	0.87727	0.88274	-0.17994	0.57873	0.82499	0.91427	-0.12931	0.24241	0.85654	0.78488	-0.34946	0.57158	0.84771	1.0862	0.11934	0.70273	0.99034	1.1695	0.22584	0.5236	0.83956	0.929	-0.10625	0.90074	0.9961	1.0263	0.037443	0.74153	0.90273	0.97763	-0.032633	0.2961	0.70419	1.5094	0.59396	0.28363	0.86864	1.273	0.34821
NADP_pos	0.85635	0.94962	1.0478	0.067398	0.16559	0.46988	1.7854	0.83623	0.77992	0.91347	0.97849	-0.031376	0.82609	0.94321	1.4606	0.54654	0.85975	0.96499	0.9011	-0.15024	0.46333	0.79836	0.64108	-0.64143	0.93616	0.99034	0.95705	-0.063334	0.80881	0.92153	1.0063	0.0090183	0.2573	0.94807	2.0116	1.0083	0.31771	0.68761	1.3232	0.404	0.31208	0.71201	2.4198	1.2749	0.73092	0.96871	0.56309	-0.82856
L-Glutamine_pos	0.86254	0.95412	1.0107	0.015364	0.65154	0.8125	1.0328	0.046597	0.085066	0.75452	0.87916	-0.1858	0.025554	0.26458	1.38	0.46468	0.99286	0.99731	1.0053	0.0076362	0.10723	0.52791	1.2916	0.36914	0.11481	0.99034	0.92415	-0.1138	0.10536	0.57564	1.1669	0.22266	0.19649	0.94807	1.1198	0.16326	0.16283	0.60344	1.1329	0.18005	0.061972	0.51885	1.2574	0.33049	0.43742	0.92473	1.1133	0.15479
Tetradecanedioic Acid_Neg	0.86469	0.95414	1.0377	0.053373	0.20301	0.48122	1.1138	0.15546	0.78023	0.91347	0.96208	-0.055766	0.64132	0.84009	1.0331	0.046968	0.56453	0.88885	1.1468	0.19765	0.31212	0.69687	1.1105	0.15122	0.71185	0.99034	0.93913	-0.09061	0.8005	0.92017	0.98359	-0.023875	0.4729	0.94807	0.88428	-0.17742	0.81614	0.92918	1.0441	0.062285	0.98603	0.99636	1.0134	0.019135	0.59128	0.95629	0.97278	-0.03982
Inosine_Neg	0.87152	0.95931	1.0068	0.0097244	0.52616	0.74124	1.1283	0.17412	0.36803	0.87727	1.1876	0.24808	0.29527	0.64215	1.1951	0.25717	0.20377	0.85654	1.1837	0.24334	0.5033	0.80749	0.86038	-0.21695	0.77181	0.99034	0.94423	-0.082785	0.42367	0.82524	1.2102	0.27525	0.63515	0.94807	1.0583	0.081773	0.66982	0.88369	1.0469	0.066103	0.97983	0.99636	0.98015	-0.02892	0.47146	0.92473	1.1458	0.19636
S-Adenosylhomocysteine_pos	0.87579	0.96136	0.94173	-0.08661	0.76634	0.89362	1.0608	0.085195	0.19397	0.77686	0.74492	-0.42484	0.31324	0.65306	0.72222	-0.46948	0.27937	0.85912	0.78225	-0.3543	0.88096	0.9561	0.94826	-0.076644	0.966	0.99034	1.0217	0.031034	0.79792	0.92017	1.127	0.1725	0.99657	0.99657	0.96858	-0.046054	0.71587	0.8996	0.9644	-0.052296	0.96242	0.98921	0.95898	-0.06042	0.4654	0.92473	0.90912	-0.13746
Serine_pos	0.87767	0.96136	1.0206	0.029485	0.57385	0.76742	0.9645	-0.052152	0.40988	0.87727	0.86609	-0.20741	0.09602	0.36562	1.5221	0.60604	0.92027	0.97712	1.029	0.041259	0.14167	0.55908	1.6051	0.68268	0.067641	0.99034	1.3435	0.42598	0.25289	0.74026	1.2626	0.33635	0.57959	0.94807	1.0982	0.13511	0.75757	0.90477	0.95554	-0.065619	0.11521	0.58521	1.6112	0.68809	0.67667	0.96871	1.1443	0.19446
Atrolactic Acid_Neg	0.88426	0.96289	1.0214	0.030493	0.036657	0.31792	1.2081	0.27272	0.80824	0.91901	1.1234	0.16787	0.29257	0.64215	1.1423	0.19188	0.50521	0.88133	0.88612	-0.17443	0.020146	0.39242	1.3177	0.398	0.87289	0.99034	0.97143	-0.041815	0.18966	0.70222	0.88336	-0.17893	0.26892	0.94807	0.84037	-0.2509	0.10548	0.54946	0.82057	-0.28529	0.26745	0.69465	0.84093	-0.24995	0.074161	0.75509	0.89182	-0.16517
Dodecenoylcarnitine_pos	0.88503	0.96289	0.9523	-0.070517	0.25001	0.5177	0.76044	-0.3951	0.23566	0.83103	0.68082	-0.55465	0.11525	0.39718	0.71909	-0.47575	0.60235	0.88885	0.8674	-0.20523	0.014412	0.36477	0.54258	-0.88209	0.046166	0.99034	0.66377	-0.59125	0.80718	0.92153	0.98485	-0.02203	0.94825	0.9961	1.0047	0.0067582	0.0096894	0.27418	1.2017	0.26511	0.73076	0.87574	1.1477	0.19875	0.046483	0.75509	1.4125	0.49828
L-Dopa_pos	0.88658	0.96289	0.92798	-0.10783	0.047406	0.31792	1.7583	0.8142	0.5676	0.88601	1.1609	0.2152	0.07978	0.35215	2.0305	1.0219	0.22879	0.85654	1.3674	0.45146	0.057202	0.47457	2.4192	1.2745	0.94568	0.99034	1.0393	0.055659	0.88419	0.9578	1.1265	0.17188	0.079972	0.94807	1.5158	0.60011	0.19497	0.63081	1.4159	0.50177	0.010917	0.5013	1.9096	0.93328	0.29332	0.87025	1.4809	0.56647
Myristic Acid_Neg	0.88802	0.96289	0.99452	-0.0079297	0.11813	0.41025	0.62193	-0.68519	0.38925	0.87727	0.84983	-0.23475	0.31007	0.65306	0.81667	-0.29218	0.88105	0.97182	1.0229	0.032623	0.48413	0.80033	0.88337	-0.17891	0.76088	0.99034	0.97441	-0.037393	0.54827	0.84878	1.2147	0.2806	0.43649	0.94807	0.94456	-0.082278	0.59463	0.8543	1.174	0.23142	0.8296	0.93475	0.98309	-0.024603	0.97396	0.99919	0.99512	-0.0070566
GTP_pos	0.89169	0.96289	1.1185	0.16158	0.89736	0.95364	1.0544	0.07638	0.8354	0.9241	1.0435	0.061422	0.041032	0.26458	0.2364	-2.0807	0.12673	0.85654	0.42677	-1.2285	0.077514	0.51068	0.2624	-1.9302	0.2466	0.99034	0.4132	-1.2751	0.49785	0.83954	0.81688	-0.2918	0.30115	0.94807	0.4424	-1.1766	0.078318	0.537	0.485	-1.0439	0.2417	0.67645	0.3939	-1.3441	0.37761	0.90465	0.76741	-0.38192
Epinephrine_pos	0.89299	0.96289	0.98063	-0.028227	0.0081652	0.26871	0.26393	-1.9217	0.38929	0.87727	0.5017	-0.99511	0.038901	0.26458	0.4276	-1.2257	0.96745	0.98818	0.8421	-0.24794	0.31509	0.69687	0.70903	-0.49607	0.74017	0.99034	1.2672	0.34165	0.44987	0.83784	1.2813	0.35764	0.91247	0.9961	1.3925	0.47767	0.60259	0.8543	1.223	0.29048	0.2665	0.69465	1.6792	0.74777	0.69289	0.96871	0.97344	-0.038843
Ureidosuccinic Acid_pos	0.89411	0.96289	0.99001	-0.014481	0.202	0.48122	1.0631	0.088248	0.29172	0.85982	0.92983	-0.10497	0.99742	0.99742	1.0008	0.0010918	0.95368	0.98218	1.0016	0.0023102	0.42365	0.77153	1.0684	0.095457	0.51449	0.99034	0.943	-0.084669	0.19328	0.70222	1.0439	0.062025	0.81126	0.97971	0.97523	-0.036181	0.84335	0.93864	1.0076	0.010971	0.59958	0.83171	0.95212	-0.07079	0.71473	0.96871	0.98008	-0.029031
N-Isovalerylglycine_Neg	0.90526	0.97256	0.90964	-0.13664	0.74449	0.8847	0.96241	-0.055274	0.70152	0.90741	1.0914	0.12622	0.36974	0.71782	0.87923	-0.18569	0.4977	0.88133	0.63634	-0.65212	0.85304	0.95065	1.0495	0.069766	0.41949	0.99034	1.2873	0.36432	0.82331	0.92674	0.99518	-0.0069729	0.74473	0.9787	0.99056	-0.013683	0.77956	0.90477	1.0671	0.093633	0.85586	0.93998	0.96135	-0.056872	0.27833	0.86825	0.79285	-0.33487
N-Acetyl-Aspartyl-Glutamate_Neg	0.90923	0.97257	0.81222	-0.30006	0.16796	0.46988	2.6093	1.3836	0.52619	0.87906	1.4378	0.52388	0.52756	0.79846	1.0476	0.067021	0.48648	0.88133	0.57288	-0.80371	0.29006	0.69687	1.116	0.15839	0.51107	0.99034	0.65785	-0.60417	0.46146	0.83954	2.8477	1.5098	0.9834	0.99654	1.0358	0.050732	0.25835	0.65796	2.4747	1.3073	0.97806	0.99636	1.1374	0.18569	0.25796	0.86825	2.5439	1.347
2-Ketoisovalerate_Neg	0.91101	0.97257	0.80387	-0.31497	0.088709	0.36798	2.1961	1.135	0.74606	0.90741	1.1313	0.17803	0.084859	0.35215	1.9475	0.9616	0.58713	0.88885	0.6741	-0.56896	0.3103	0.69687	1.8491	0.88679	0.61948	0.99034	0.8126	-0.29938	0.78629	0.91786	0.96921	-0.045115	0.77426	0.9787	0.75913	-0.39759	0.45736	0.76516	1.2144	0.28023	0.56215	0.82388	0.75289	-0.40949	0.63839	0.96871	0.89755	-0.15594
Cysteine-S-Sulfate_Neg	0.91178	0.97257	1.0213	0.030458	0.60639	0.79203	0.67211	-0.57323	0.13099	0.76648	0.67914	-0.55821	0.62337	0.84005	1.1729	0.23008	0.49222	0.88133	1.3465	0.42923	0.68158	0.87463	1.0938	0.12938	0.7239	0.99034	0.8007	-0.32066	0.17695	0.70208	1.353	0.43613	0.83909	0.98662	0.85877	-0.21966	0.60577	0.85544	1.1179	0.16077	0.34082	0.73924	1.957	0.96866	0.082255	0.78404	1.5019	0.58678
Guanine_pos_2	0.92118	0.97816	1.0066	0.0094298	0.2266	0.49912	0.88553	-0.17539	0.015413	0.74418	0.92678	-0.1097	0.71149	0.87779	0.96018	-0.058625	0.55459	0.88885	0.96643	-0.04927	0.52013	0.81823	0.93585	-0.095645	0.58527	0.99034	0.96912	-0.045251	0.43315	0.82945	0.98376	-0.023621	0.77758	0.9787	1.0354	0.050146	0.97226	0.98769	1.0049	0.0070195	0.368	0.76867	1.0835	0.11575	0.90726	0.99333	1.0099	0.014185
Acadesine_Neg	0.92158	0.97816	1.0124	0.017748	0.031325	0.28773	1.1308	0.17734	0.32698	0.86557	1.0365	0.051757	0.048177	0.27906	1.1673	0.22317	0.3434	0.87225	1.0584	0.081923	0.12786	0.55614	1.1144	0.1563	0.70862	0.99034	0.97262	-0.04005	0.93288	0.96968	0.99895	-0.0015124	0.21648	0.94807	0.92231	-0.11668	0.64924	0.87727	0.97325	-0.039117	0.6893	0.85361	0.97701	-0.033554	0.2889	0.86864	0.94091	-0.087871
Indoleacrylic Acid_Neg	0.92357	0.97816	1.0063	0.0089997	0.3627	0.62308	0.83607	-0.25831	0.090042	0.75452	0.92721	-0.10904	0.51163	0.78718	1.071	0.098934	0.2574	0.85912	0.93953	-0.089985	0.5589	0.84315	0.90934	-0.13711	0.70028	0.99034	1.0293	0.041692	0.50035	0.83954	1.1027	0.14102	0.85555	0.98855	0.97016	-0.043701	0.26359	0.65796	1.1597	0.21375	0.87988	0.94544	0.94247	-0.085479	0.21024	0.86825	1.0686	0.095766
Succinyl-CoA_pos	0.92775	0.98026	1.378	0.46262	0.53223	0.74124	2.4296	1.2807	0.086103	0.75452	2.1924	1.1325	0.85687	0.94742	0.89464	-0.16063	0.0024387	0.36417	2.8445	1.5082	0.62749	0.8614	1.3347	0.41651	0.0525	0.99034	0.32527	-1.6203	0.48438	0.83954	2.0018	1.0013	0.46856	0.94807	0.71715	-0.47966	0.23059	0.65778	2.2511	1.1706	0.014345	0.5013	0.20846	-2.2622	0.13394	0.8572	2.5621	1.3573
Phosphorylcholine_pos	0.93317	0.98263	1.0014	0.0020785	0.39272	0.65057	0.92916	-0.106	0.12547	0.75452	0.90971	-0.13652	0.47873	0.77147	0.9289	-0.1064	0.088512	0.85654	0.89535	-0.15948	0.99227	0.99881	1.001	0.0013911	0.409	0.99034	0.95277	-0.069793	0.20608	0.70222	1.0329	0.046755	0.69114	0.97063	1.0344	0.048811	0.4381	0.76094	1.0398	0.056308	0.43939	0.77931	1.0909	0.12557	0.97787	0.99919	1.0068	0.0098171
dTMP_Neg	0.93438	0.98263	1.0822	0.11393	0.49349	0.72965	1.3047	0.38374	0.78235	0.91347	1.1332	0.18039	0.24603	0.58011	1.549	0.63136	0.82067	0.95745	0.91374	-0.13014	0.67781	0.87463	0.66941	-0.57903	0.55153	0.99034	1.2543	0.32684	0.72722	0.88828	1.0661	0.092377	0.84127	0.98662	1.1899	0.25089	0.67752	0.88369	0.84015	-0.25129	0.10079	0.57261	1.8539	0.89056	0.47064	0.92473	1.1598	0.21383
Citric Acid_Neg	0.93733	0.98342	1.0361	0.051186	0.10905	0.40807	0.42802	-1.2243	0.082803	0.75452	0.60235	-0.73134	0.34767	0.69533	0.68683	-0.54197	0.25842	0.85912	0.52922	-0.91806	0.58435	0.84781	0.89483	-0.16031	0.75441	0.99034	1.3081	0.38749	0.45403	0.83915	1.1809	0.23986	0.78254	0.9787	1.0091	0.013015	0.67811	0.88369	1.1915	0.25284	0.82446	0.93475	1.586	0.66537	0.89756	0.99333	1.2658	0.34005
Phenylacetylglycine_pos	0.94197	0.98396	0.88974	-0.16854	0.056774	0.31792	0.6462	-0.62995	0.43091	0.87727	1.3821	0.46688	0.097934	0.36562	0.71145	-0.49116	0.7139	0.92542	1.0272	0.03867	0.28702	0.69687	0.76744	-0.38187	0.77769	0.99034	0.81572	-0.29385	0.34236	0.77856	1.2345	0.30398	0.56658	0.94807	1.1853	0.24529	0.025336	0.42039	2.1059	1.0744	0.66023	0.84563	1.1515	0.20358	0.93553	0.99333	1.0444	0.062725
Mopeg Sulfate_Neg	0.94223	0.98396	1.0005	0.00075969	0.53464	0.74124	0.95239	-0.070382	0.3641	0.87727	1.0959	0.13208	0.4505	0.74923	1.0588	0.082468	0.17579	0.85654	1.1276	0.17326	0.91049	0.96659	0.99871	-0.0018579	0.8498	0.99034	0.98784	-0.017657	0.88982	0.9578	1.0197	0.02809	0.66742	0.96142	0.96981	-0.044229	0.91494	0.95923	0.98969	-0.014947	0.56831	0.82748	1.0557	0.078173	0.201	0.86825	0.90077	-0.15076
L-Tartaric Acid_Neg	0.95244	0.98793	0.82608	-0.27564	0.18433	0.47106	1.4529	0.5389	0.33644	0.87631	0.56691	-0.81881	0.12315	0.40566	1.5774	0.65755	0.46664	0.88133	0.69792	-0.51887	0.17684	0.60943	1.4746	0.5603	0.82674	0.99034	0.88627	-0.17419	0.38881	0.80051	0.69523	-0.52443	0.5803	0.94807	1.0792	0.10991	0.8966	0.95923	0.97059	-0.043073	0.62369	0.83647	0.8911	-0.16635	0.82422	0.99333	0.89705	-0.15674
Hydroxyphenyllactic Acid_Neg	0.95439	0.98793	1.0523	0.073584	0.37352	0.62908	1.063	0.088097	0.92215	0.96741	0.98939	-0.015391	0.47663	0.77087	1.1234	0.16793	0.71678	0.92542	1.1039	0.14262	0.0051066	0.36477	1.5723	0.65283	0.74661	0.99034	1.1009	0.13868	0.88657	0.9578	1.0146	0.020895	0.79765	0.9787	0.88586	-0.17485	0.071183	0.537	0.8251	-0.27736	0.42022	0.77771	1.2491	0.32083	0.73369	0.96871	0.97514	-0.036318
N-Acetylaspartate_pos	0.95583	0.98793	0.99752	-0.0035818	0.363	0.62308	0.93124	-0.10278	0.55802	0.88108	0.97867	-0.031105	0.54325	0.80588	0.95976	-0.05926	0.059428	0.85654	0.91609	-0.12644	0.76791	0.91005	0.97608	-0.034931	0.15983	0.99034	0.94215	-0.085968	0.28159	0.74026	1.0798	0.11081	0.89281	0.9961	1.0045	0.0064206	0.33575	0.69992	0.94918	-0.075252	0.90048	0.95836	0.99622	-0.0054644	0.65288	0.96871	1.0602	0.084335
Alpha-Ketoisovaleric Acid_pos	0.95767	0.98793	1.0334	0.047432	0.020209	0.28773	1.3783	0.46289	0.7886	0.91347	0.97397	-0.038053	0.29458	0.64215	1.103	0.1414	0.54766	0.88885	0.91741	-0.12436	0.2925	0.69687	1.2003	0.26334	0.73985	0.99034	0.93599	-0.09543	0.77837	0.91766	1.0391	0.055289	0.95632	0.9961	0.972	-0.040972	0.094695	0.537	1.3279	0.40909	0.27257	0.69465	1.2005	0.26364	0.27606	0.86825	1.4416	0.52767
Pyridoxal-5-Phosphate_Neg	0.95872	0.98793	1.0576	0.080794	0.13205	0.42974	1.6074	0.68474	0.78653	0.91347	0.94633	-0.079592	0.088891	0.35877	1.8306	0.87235	0.24746	0.85654	1.4524	0.53848	0.14409	0.55908	1.5882	0.66737	0.18418	0.99034	1.6437	0.71699	0.35163	0.79161	0.79853	-0.32458	0.1238	0.94807	1.7379	0.79736	0.41211	0.7544	0.89264	-0.16384	0.041948	0.51885	2.1023	1.0719	0.11878	0.84465	0.83126	-0.26662
Methylsuccinate_Neg	0.96041	0.98793	0.94585	-0.08031	0.26982	0.53908	1.2765	0.35223	0.99631	0.99854	0.93788	-0.092528	0.030236	0.26458	1.6161	0.69251	0.80127	0.94965	0.90038	-0.15139	0.10035	0.52791	1.4092	0.49486	0.84067	0.99034	0.94811	-0.07688	0.69813	0.88666	1.1752	0.23293	0.21648	0.94807	0.69048	-0.53432	0.73043	0.8996	0.87403	-0.19424	0.28283	0.69465	0.72026	-0.47342	0.72764	0.96871	1.1189	0.16205
Acetylornithine_pos	0.96146	0.98793	0.99085	-0.013264	0.56415	0.76259	0.87344	-0.19522	0.21445	0.80063	0.86467	-0.20977	0.67028	0.85322	0.89975	-0.1524	0.088135	0.85654	0.81474	-0.29559	0.99007	0.99881	0.97913	-0.030434	0.87066	0.99034	1.0121	0.017394	0.18268	0.70208	1.1467	0.19743	0.77688	0.9787	1.0305	0.043281	0.092538	0.537	1.2463	0.31767	0.348	0.74289	1.1668	0.22251	0.24341	0.86825	1.1318	0.17857
Glutamine_pos	0.96857	0.99092	0.99907	-0.0013488	0.81299	0.89709	0.98275	-0.025106	0.0040471	0.74418	0.83755	-0.25575	0.047333	0.27906	1.2805	0.35666	0.49054	0.88133	0.95438	-0.067361	0.21941	0.64131	1.1954	0.25751	0.076512	0.99034	0.95555	-0.065596	0.11141	0.58039	1.1502	0.20184	0.15888	0.94807	1.164	0.21907	0.2058	0.63149	1.113	0.15443	0.036239	0.51885	1.2309	0.29967	0.36998	0.90025	1.1139	0.15564
N-Acetyltyrptophan_Neg	0.9709	0.99092	0.99259	-0.01073	0.83149	0.90897	1.0219	0.03129	0.34975	0.87727	0.84258	-0.24712	0.48871	0.77267	0.90518	-0.14372	0.26595	0.85912	0.79346	-0.33377	0.62874	0.8614	1.0987	0.13576	0.55913	0.99034	1.188	0.24859	0.19308	0.70222	0.84485	-0.24324	0.61107	0.94807	1.0614	0.086025	0.19998	0.63081	0.87185	-0.19786	0.21584	0.67645	1.7108	0.77466	0.47582	0.92473	1.1715	0.22833
Glyoxylate_Neg	0.97101	0.99092	1.0171	0.024429	0.028893	0.28773	1.1329	0.18005	0.22429	0.81693	0.88648	-0.17384	0.72657	0.88655	1.0125	0.017891	0.16015	0.85654	0.89142	-0.16583	0.69517	0.87479	1.0567	0.079583	0.98312	0.99034	0.99973	-0.00039511	0.70321	0.88666	0.96571	-0.050336	0.30928	0.94807	0.85382	-0.22799	0.50615	0.78627	1.0464	0.065458	0.58671	0.83171	0.91615	-0.12635	0.73795	0.96871	1.0274	0.039044
Acetylcholine_pos	0.97539	0.9911	1.0074	0.010583	0.8286	0.90897	1.0111	0.015868	0.17994	0.77686	0.91867	-0.12238	0.92671	0.96332	1.0188	0.026855	0.89425	0.97182	1.0159	0.022807	0.35568	0.72251	1.1233	0.16777	0.51012	0.99034	0.95969	-0.059352	0.81587	0.92369	1.0095	0.013588	0.97428	0.9961	1.0122	0.017464	0.25756	0.65796	1.0777	0.108	0.43022	0.77771	1.052	0.073085	0.53202	0.93599	1.052	0.073135
Theobromine_pos	0.97561	0.9911	1.0018	0.0025749	0.16955	0.46988	0.89222	-0.16453	0.085834	0.75452	0.91348	-0.13055	0.40114	0.74735	0.91765	-0.12398	0.27708	0.85912	0.92997	-0.10475	0.48149	0.80033	0.93858	-0.091442	0.49891	0.99034	0.95738	-0.06284	0.34797	0.78732	1.0248	0.035393	0.79931	0.9787	1.0321	0.045617	0.48382	0.77688	1.0318	0.045147	0.23923	0.67645	1.1068	0.14641	0.87657	0.99333	1.0075	0.010768
Gluconolactone_pos	0.98004	0.99165	0.99133	-0.012564	0.58102	0.77011	0.94691	-0.078695	0.25042	0.83103	0.87973	-0.18486	0.40486	0.74914	0.90176	-0.14919	0.35921	0.87342	0.9004	-0.15137	0.48185	0.80033	0.92419	-0.11374	0.42182	0.99034	0.95874	-0.06079	0.25118	0.74026	1.067	0.093587	0.76569	0.9787	1.032	0.045388	0.21921	0.64608	1.1219	0.16596	0.4718	0.78967	1.0975	0.1342	0.4977	0.92756	1.0879	0.12153
5,6-Dihydrouracil_pos	0.98059	0.99165	1.0229	0.032622	0.43147	0.68303	1.0925	0.1276	0.80731	0.91901	0.97874	-0.030997	0.97218	0.98094	0.98141	-0.027079	0.50569	0.88133	0.9239	-0.1142	0.52264	0.81868	0.90143	-0.14971	0.81217	0.99034	1.0232	0.033074	0.48621	0.83954	1.0688	0.096059	0.63277	0.94807	0.93892	-0.090932	0.24816	0.65796	1.1839	0.24359	0.50296	0.79363	1.0926	0.12776	0.21938	0.86825	1.2457	0.317
Gentisate_Neg	0.98494	0.99168	0.97327	-0.039084	0.50918	0.73405	0.95177	-0.071309	0.98891	0.99558	1.1876	0.24809	0.81961	0.94321	1.1272	0.17277	0.67242	0.90705	1.0987	0.13582	0.61124	0.86111	0.95119	-0.072201	0.02322	0.99034	0.63283	-0.66011	0.082361	0.51377	0.75394	-0.40748	0.077181	0.94807	0.72433	-0.46528	0.0097923	0.27418	0.63488	-0.65545	0.010018	0.5013	0.56143	-0.83281	0.010323	0.5781	0.69814	-0.51842
Selenomethionine_pos	0.98504	0.99168	0.99327	-0.0097491	0.18321	0.47106	2.1227	1.0859	0.33173	0.8691	1.2259	0.29389	0.071988	0.34203	3.2335	1.6931	0.48488	0.88133	1.3808	0.46548	0.11271	0.54294	2.0549	1.039	0.13468	0.99034	0.64633	-0.62965	0.57338	0.85305	1.6305	0.70531	0.1583	0.94807	1.4458	0.53183	0.26014	0.65796	1.7745	0.82742	0.23879	0.67645	1.6533	0.72532	0.32519	0.89633	2.1441	1.1004
2,3-Dihydroxybenzoic Acid_Neg	0.99056	0.99239	0.96092	-0.057519	0.23369	0.50301	0.86985	-0.20117	0.98097	0.9898	1.0946	0.13043	0.77582	0.91706	1.1202	0.16379	0.78097	0.94371	1.0358	0.050758	0.43099	0.77541	0.90381	-0.14591	0.0092832	0.99034	0.64845	-0.62494	0.14342	0.64524	0.77058	-0.37599	0.12103	0.94807	0.78936	-0.34124	0.0068756	0.27418	0.66327	-0.59232	0.0067078	0.5013	0.62645	-0.67473	0.047961	0.75509	0.73183	-0.45042
DHAP/G-3-P_Neg	0.99187	0.99239	0.98333	-0.024246	0.0081264	0.26871	1.6633	0.73403	0.50319	0.87727	1.1254	0.17041	0.082769	0.35215	1.3735	0.4579	0.76725	0.94371	1.0756	0.10518	0.090287	0.52791	1.5038	0.58864	0.98218	0.99034	1.0073	0.010501	0.33429	0.77856	0.87259	-0.19663	0.88868	0.9961	0.95448	-0.067216	0.64095	0.87014	0.93921	-0.090473	0.62008	0.83647	0.88582	-0.17491	0.2028	0.86825	0.82094	-0.28466
Dephospho-CoA_pos	0.99239	0.99239	0.94626	-0.079698	0.93109	0.9746	0.95233	-0.070467	0.67331	0.90741	0.86448	-0.21009	0.53815	0.80588	0.7922	-0.33606	0.65538	0.90705	0.85247	-0.23028	0.50402	0.80749	0.77234	-0.3727	0.35481	0.99034	0.82042	-0.28557	0.64721	0.86804	1.073	0.10159	0.10512	0.94807	0.67456	-0.56798	0.031732	0.43973	1.4052	0.49079	0.016822	0.5013	0.56378	-0.8268	0.16083	0.86825	1.3079	0.3872
