# Supplementary figures and images for: Effects of Whole and Partial Heart Irradiation on Collagen, Mast Cells, and Toll-like Receptor 4 in the Mouse Heart
Source: MDPI journal article supplement (doi:10.3390/cancers15020406), 2023-01-07

Figure S2

Top part of the heart

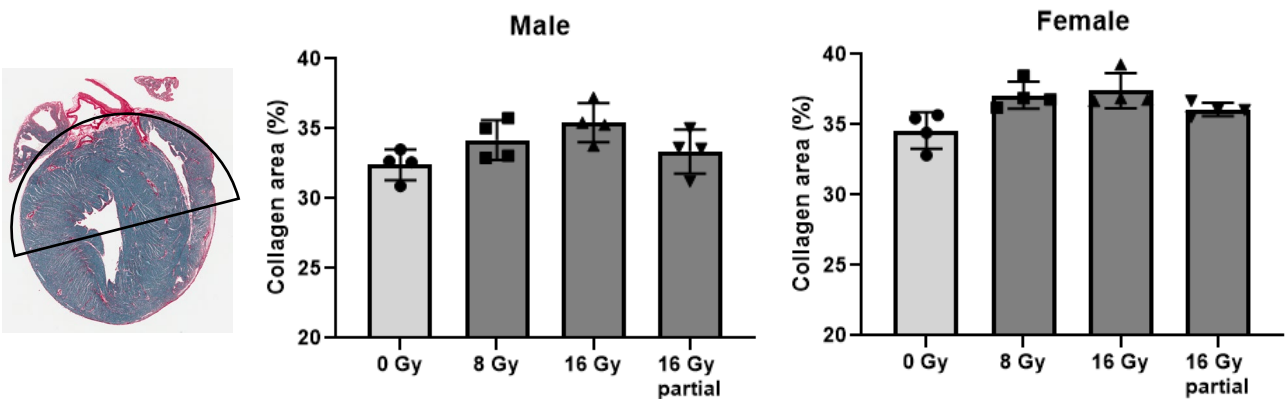

Bottom part of the heart

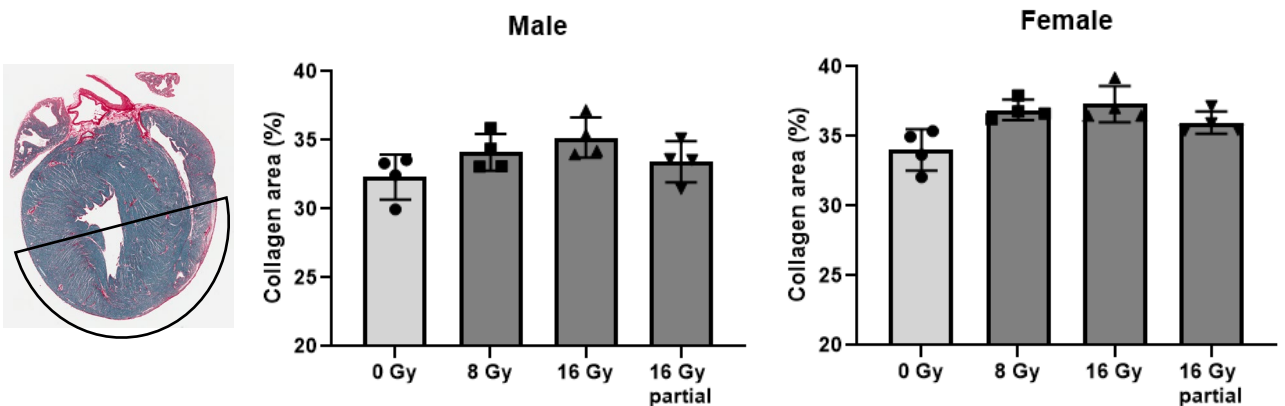

Supplement: s1 [file s1]

Figure S1

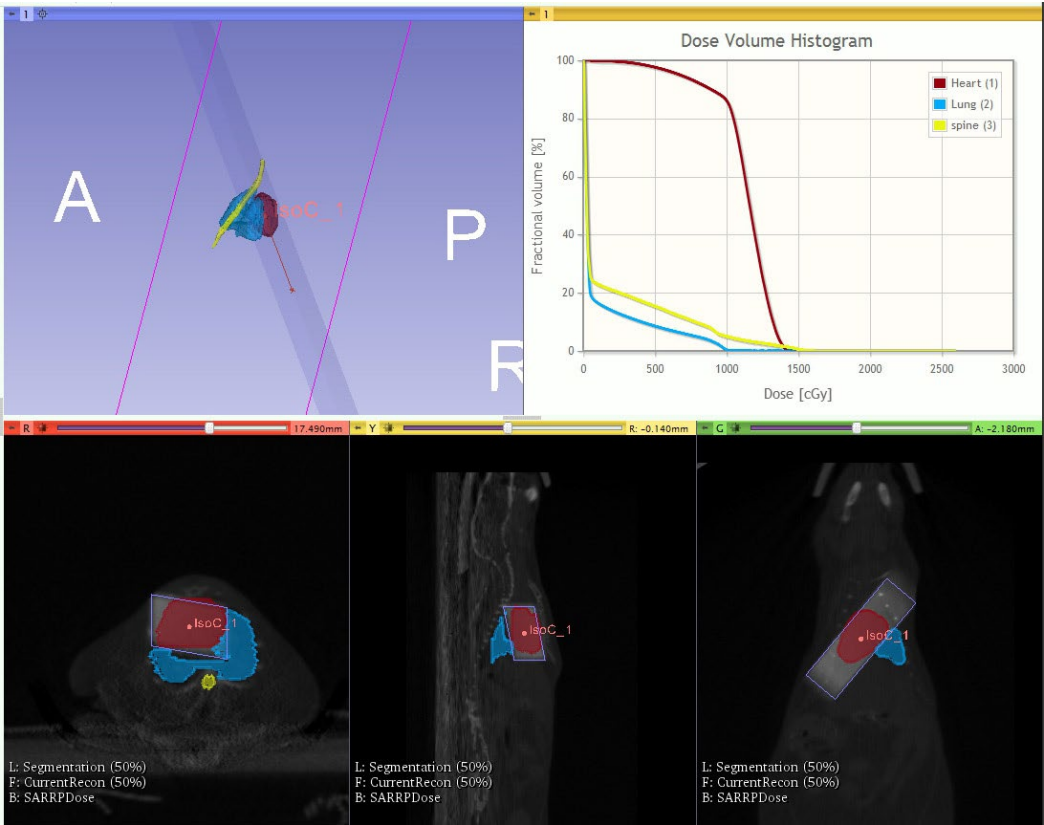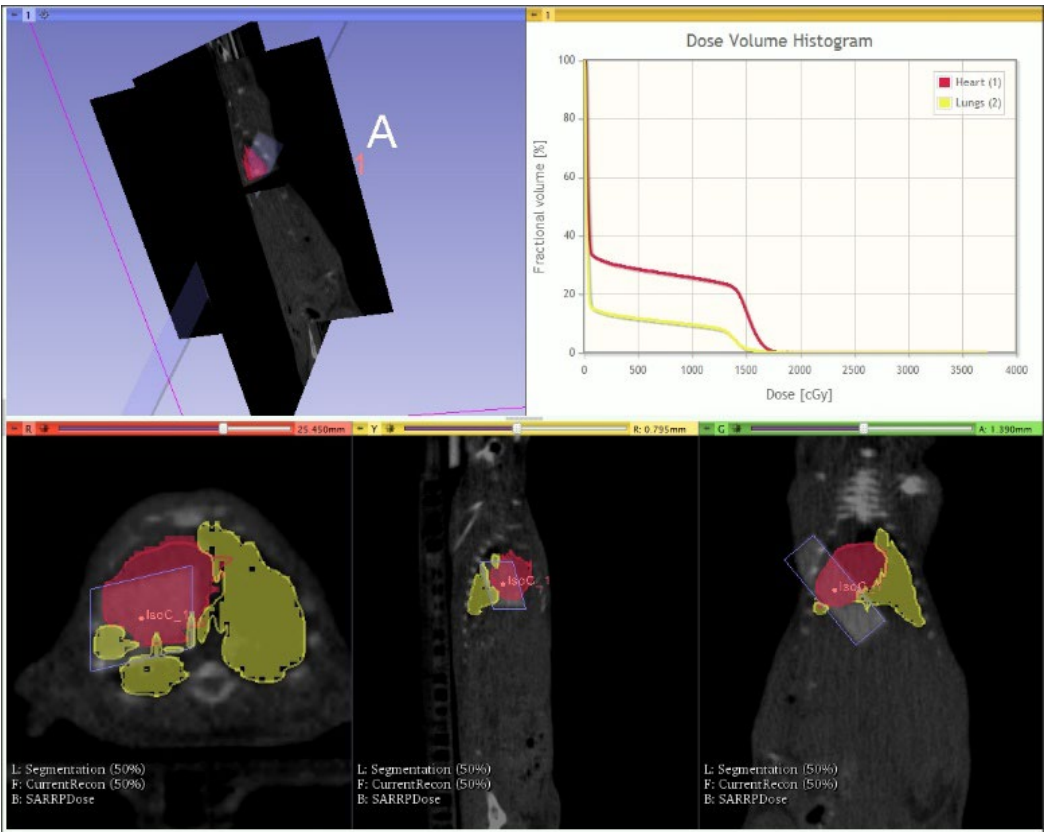

Supplement: s1 [file s1]

**Figure S3**

**Top part of the heart**

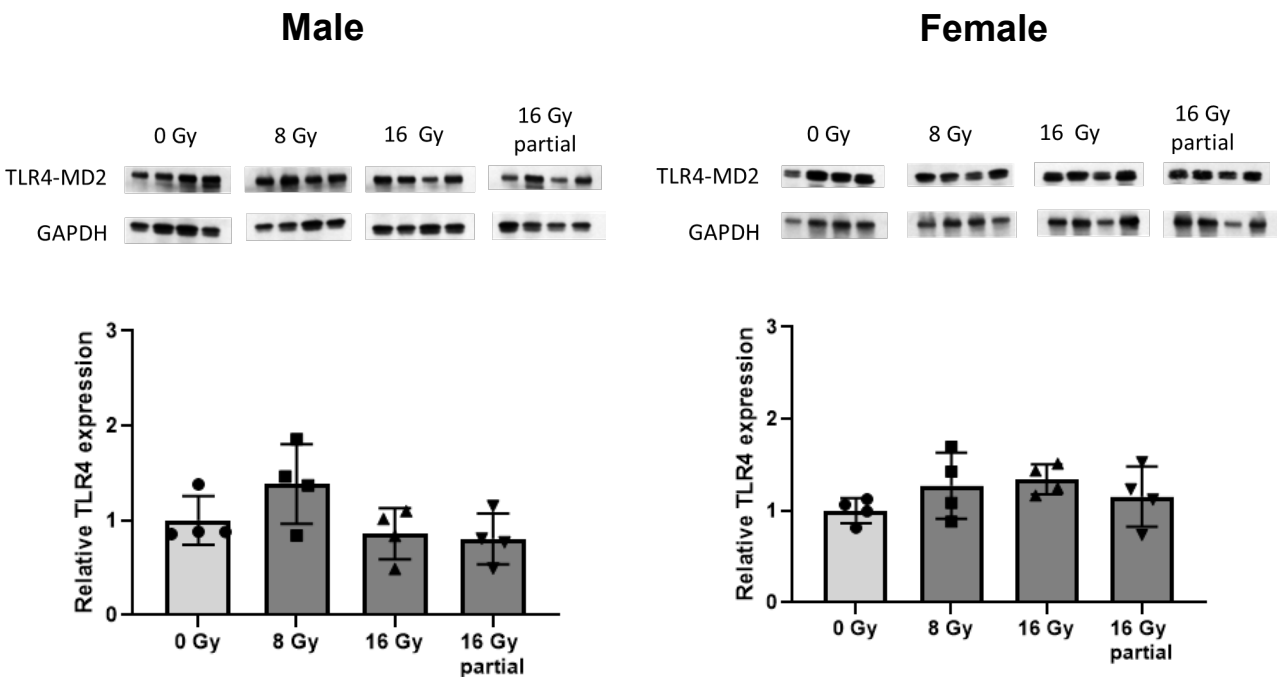

**Bottom part of the heart**

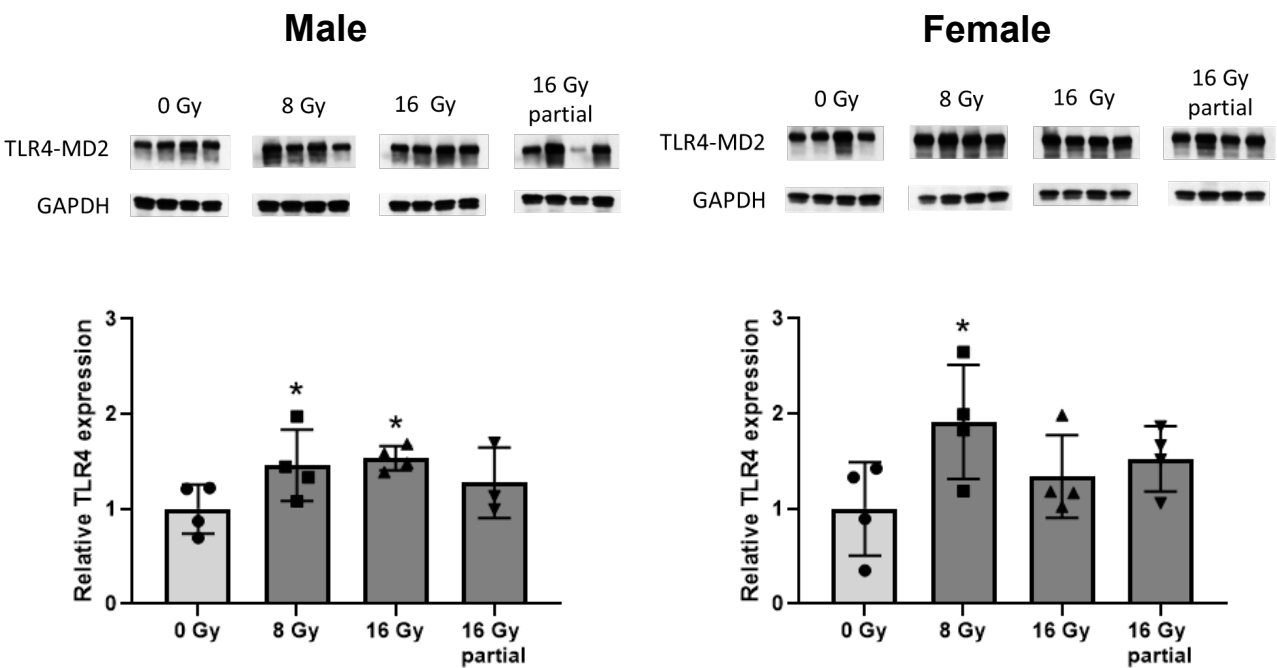

Supplement: s1 [file s1]
